# Supplementary material
Source: MDPI journal article supplement (https://www.mdpi.com/2071-1050/12/11/4677)

# **River Restoration Integrated With Sustainable Urban Water Management For Resilient Cities**

Aline Pires Veról, Ianic Bigate Lourenço, João Paulo Rebechi Fraga, Bruna Peres Battemarco,  
Mylenna Linares Merlo, Paulo Canedo de Magalhães and Marcelo Gomes Miguez

## **Urban and Landscape Design**

Dona Eugênia Watershed  
Brazil

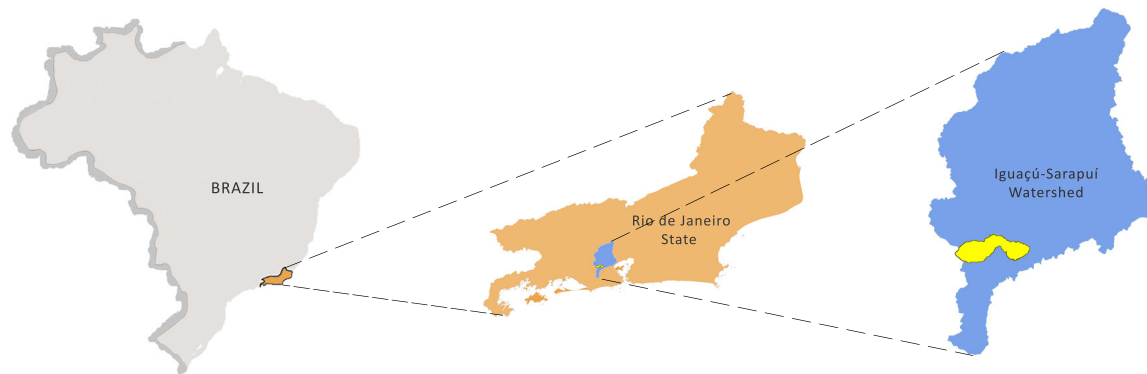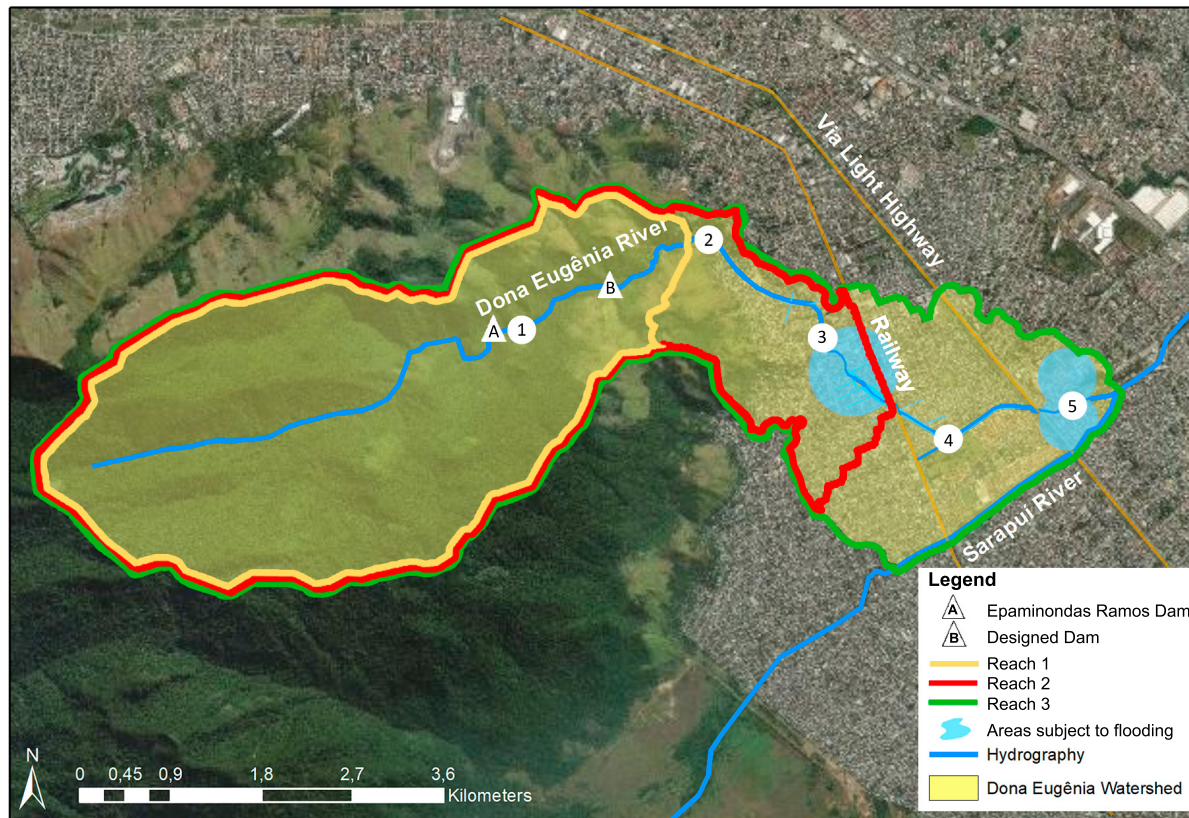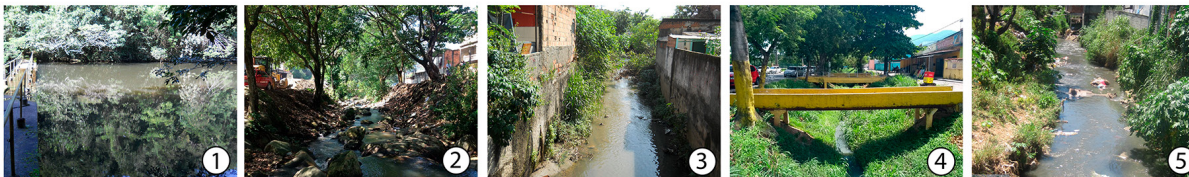

## Dona Eugênia Watershed

- Dona Eugênia watershed has a drainage area of 18 km<sup>2</sup>.
- Dona Eugênia River is about 10 km long - the first 4 km are located inside an Environmental Protection Area called Gericinó/Mendanha, in the city of Nova Iguaçu and the subsequent 6 km are in the city of Mesquita, where it crosses the urban area until its outfall, on Sarapuí River.
- Inside the Environmental Protection Area, there is a park named Nova Iguaçu Natural Municipal Park, an area of 11 km<sup>2</sup>, with an altitude between 150 m and 956 m, which is an important representative of the Atlantic Forest with several examples of natural local flora and fauna.
- Inside the park, there is a desactiveted dam called Epaminondas Ramos ("A"), used as a water supply in the past.
- In 2009 a revision of the Water Resources Master Plan of the Iguaçu-Sarapuí Watersheds pointed to a laminating dam ("B") for flood control.
- The critical points are the city center, where the city hall is located, and the areas along and upstream of the railway and at the river mouth, as indicated in the map.



## Epaminondas Ramos Reservoir

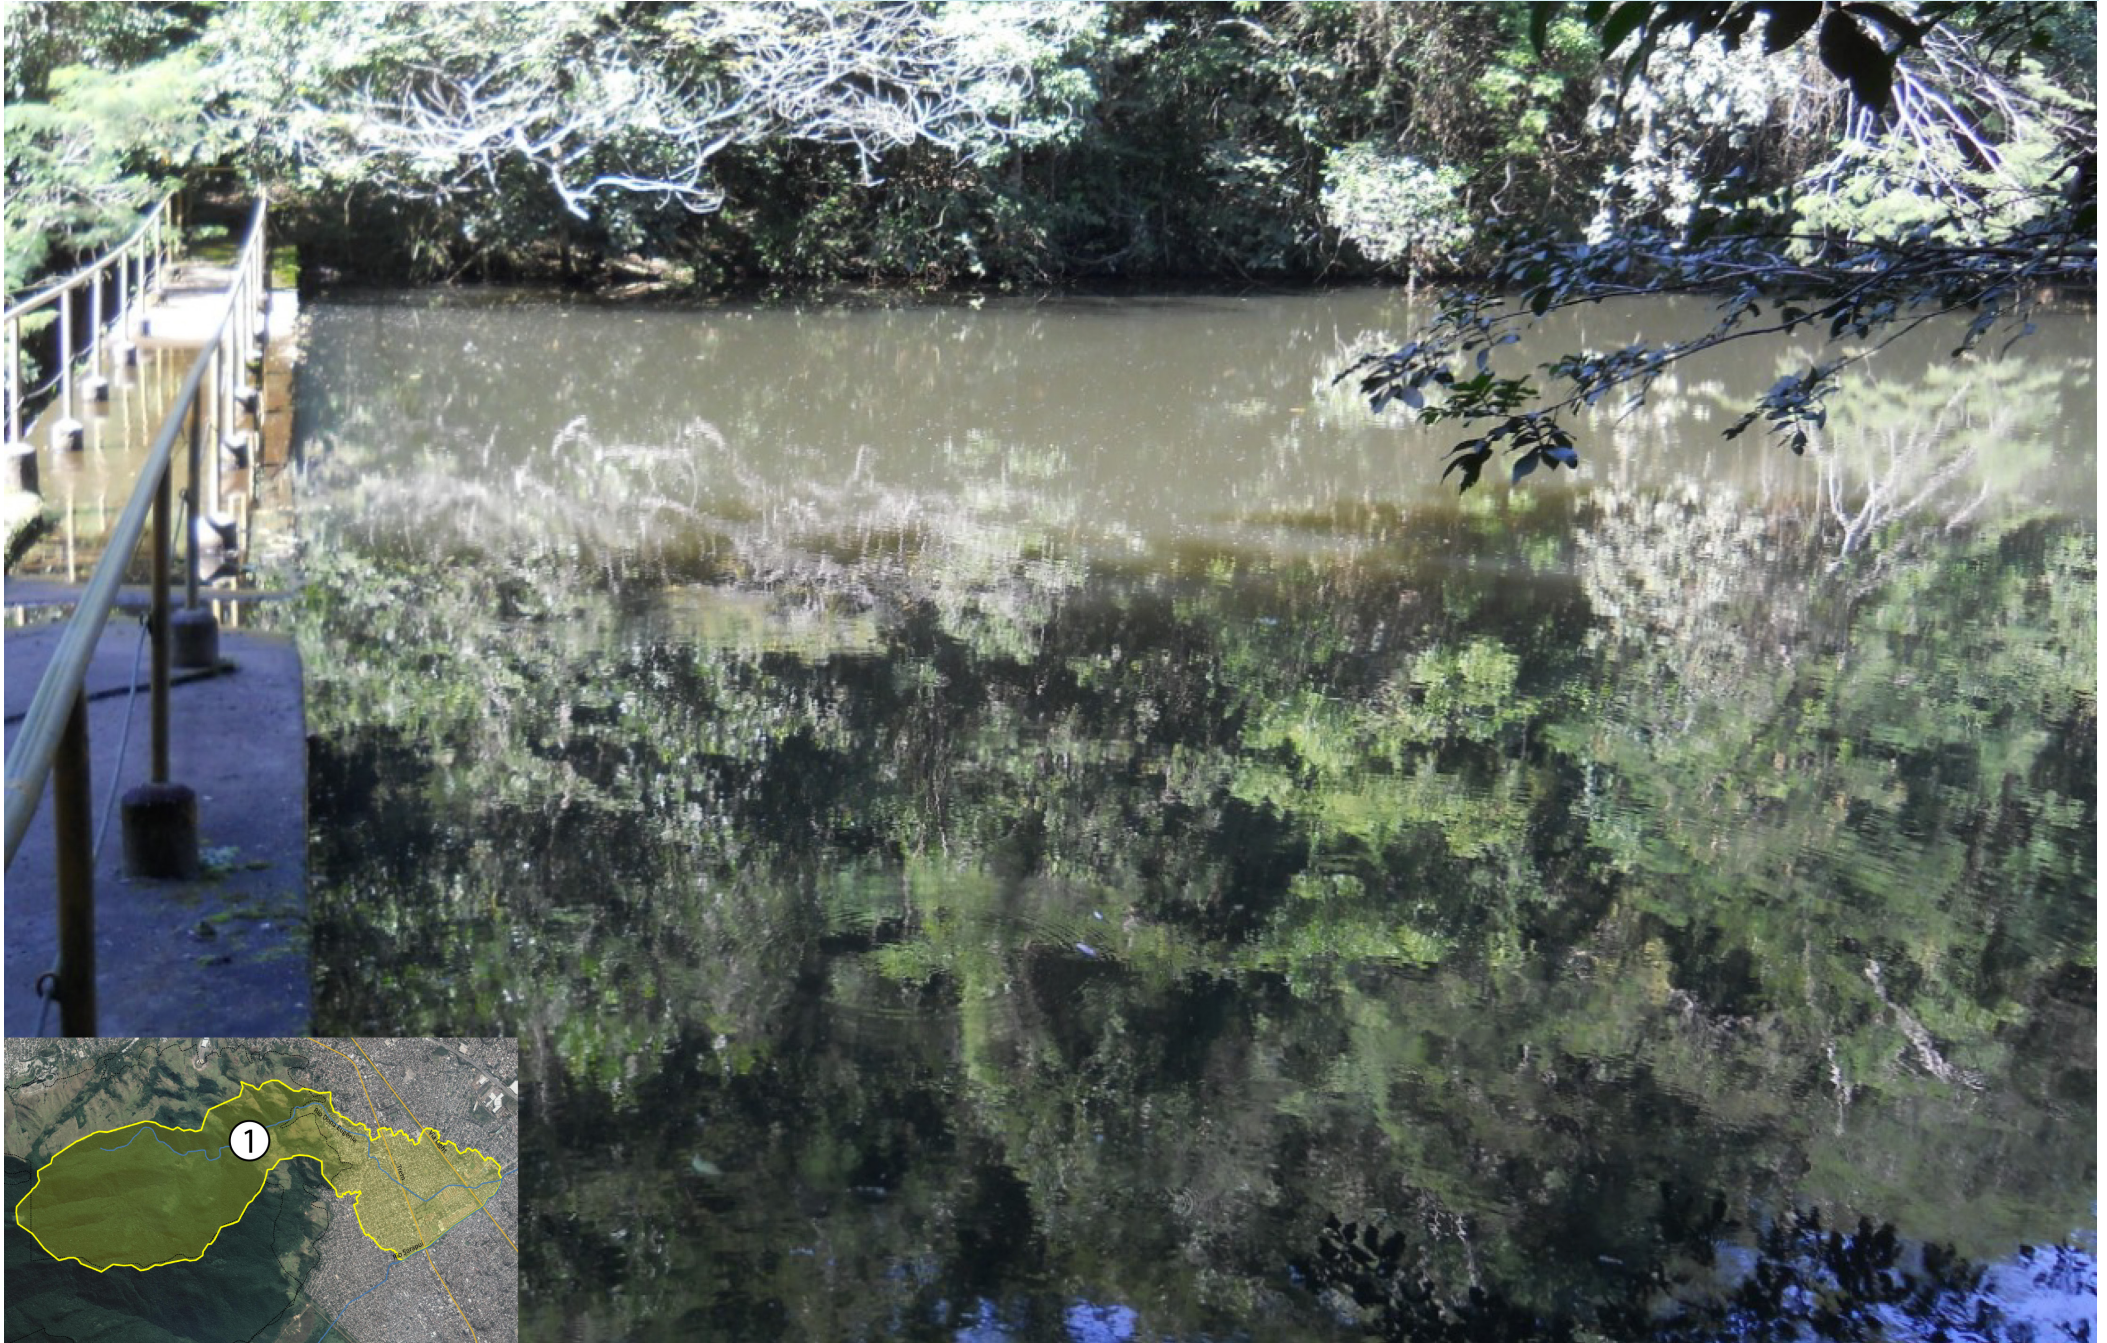



## The first reach of Dona Eugênia River inside the urban area

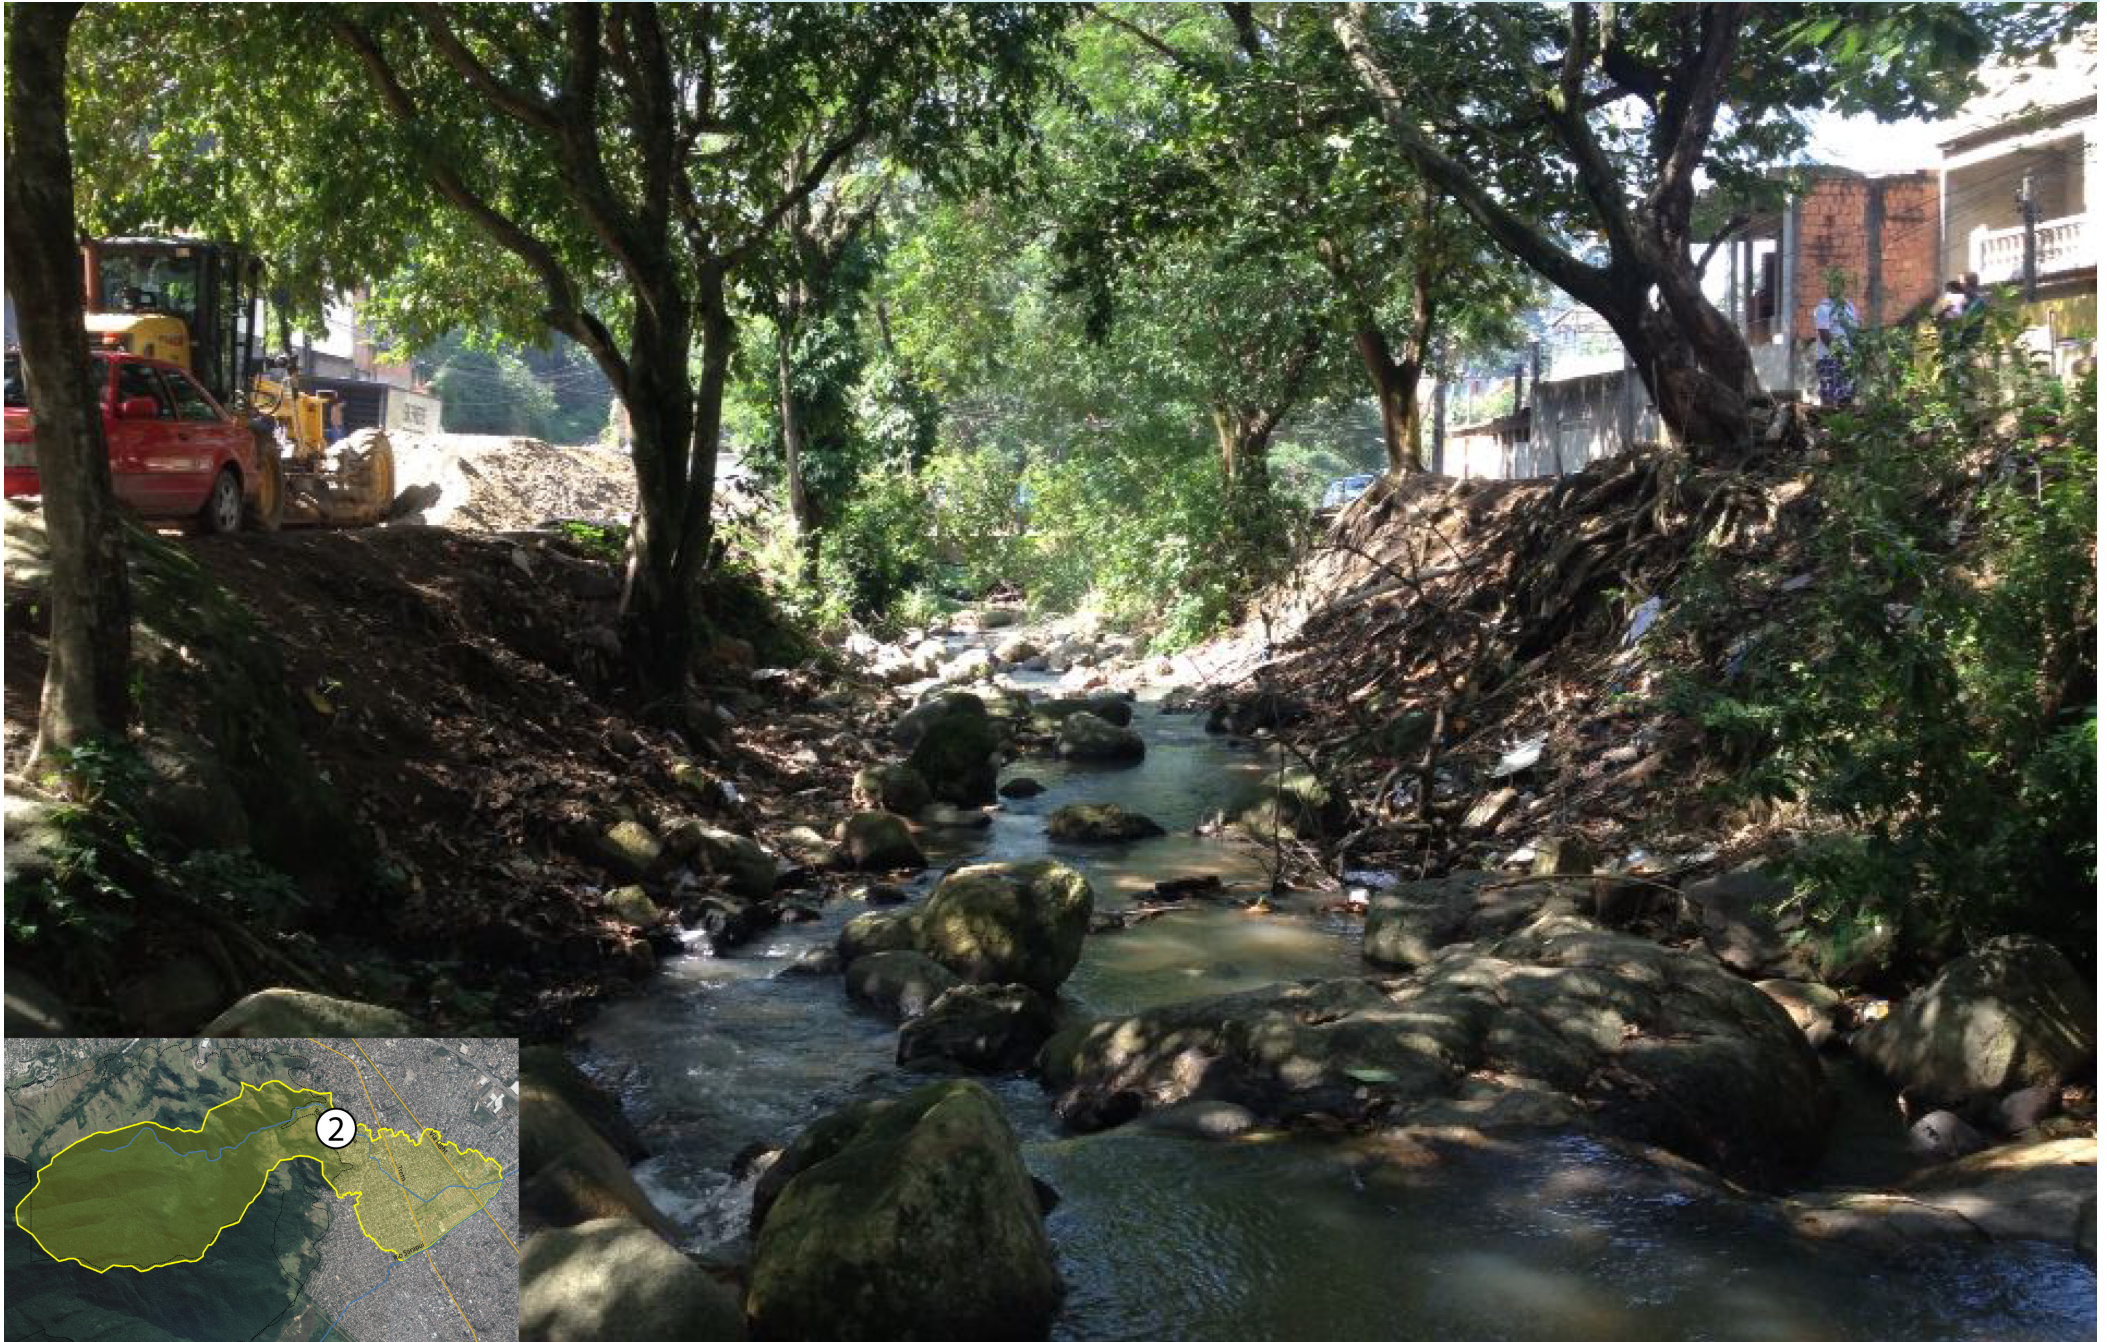



## Mesquita City Center – a Critical Area

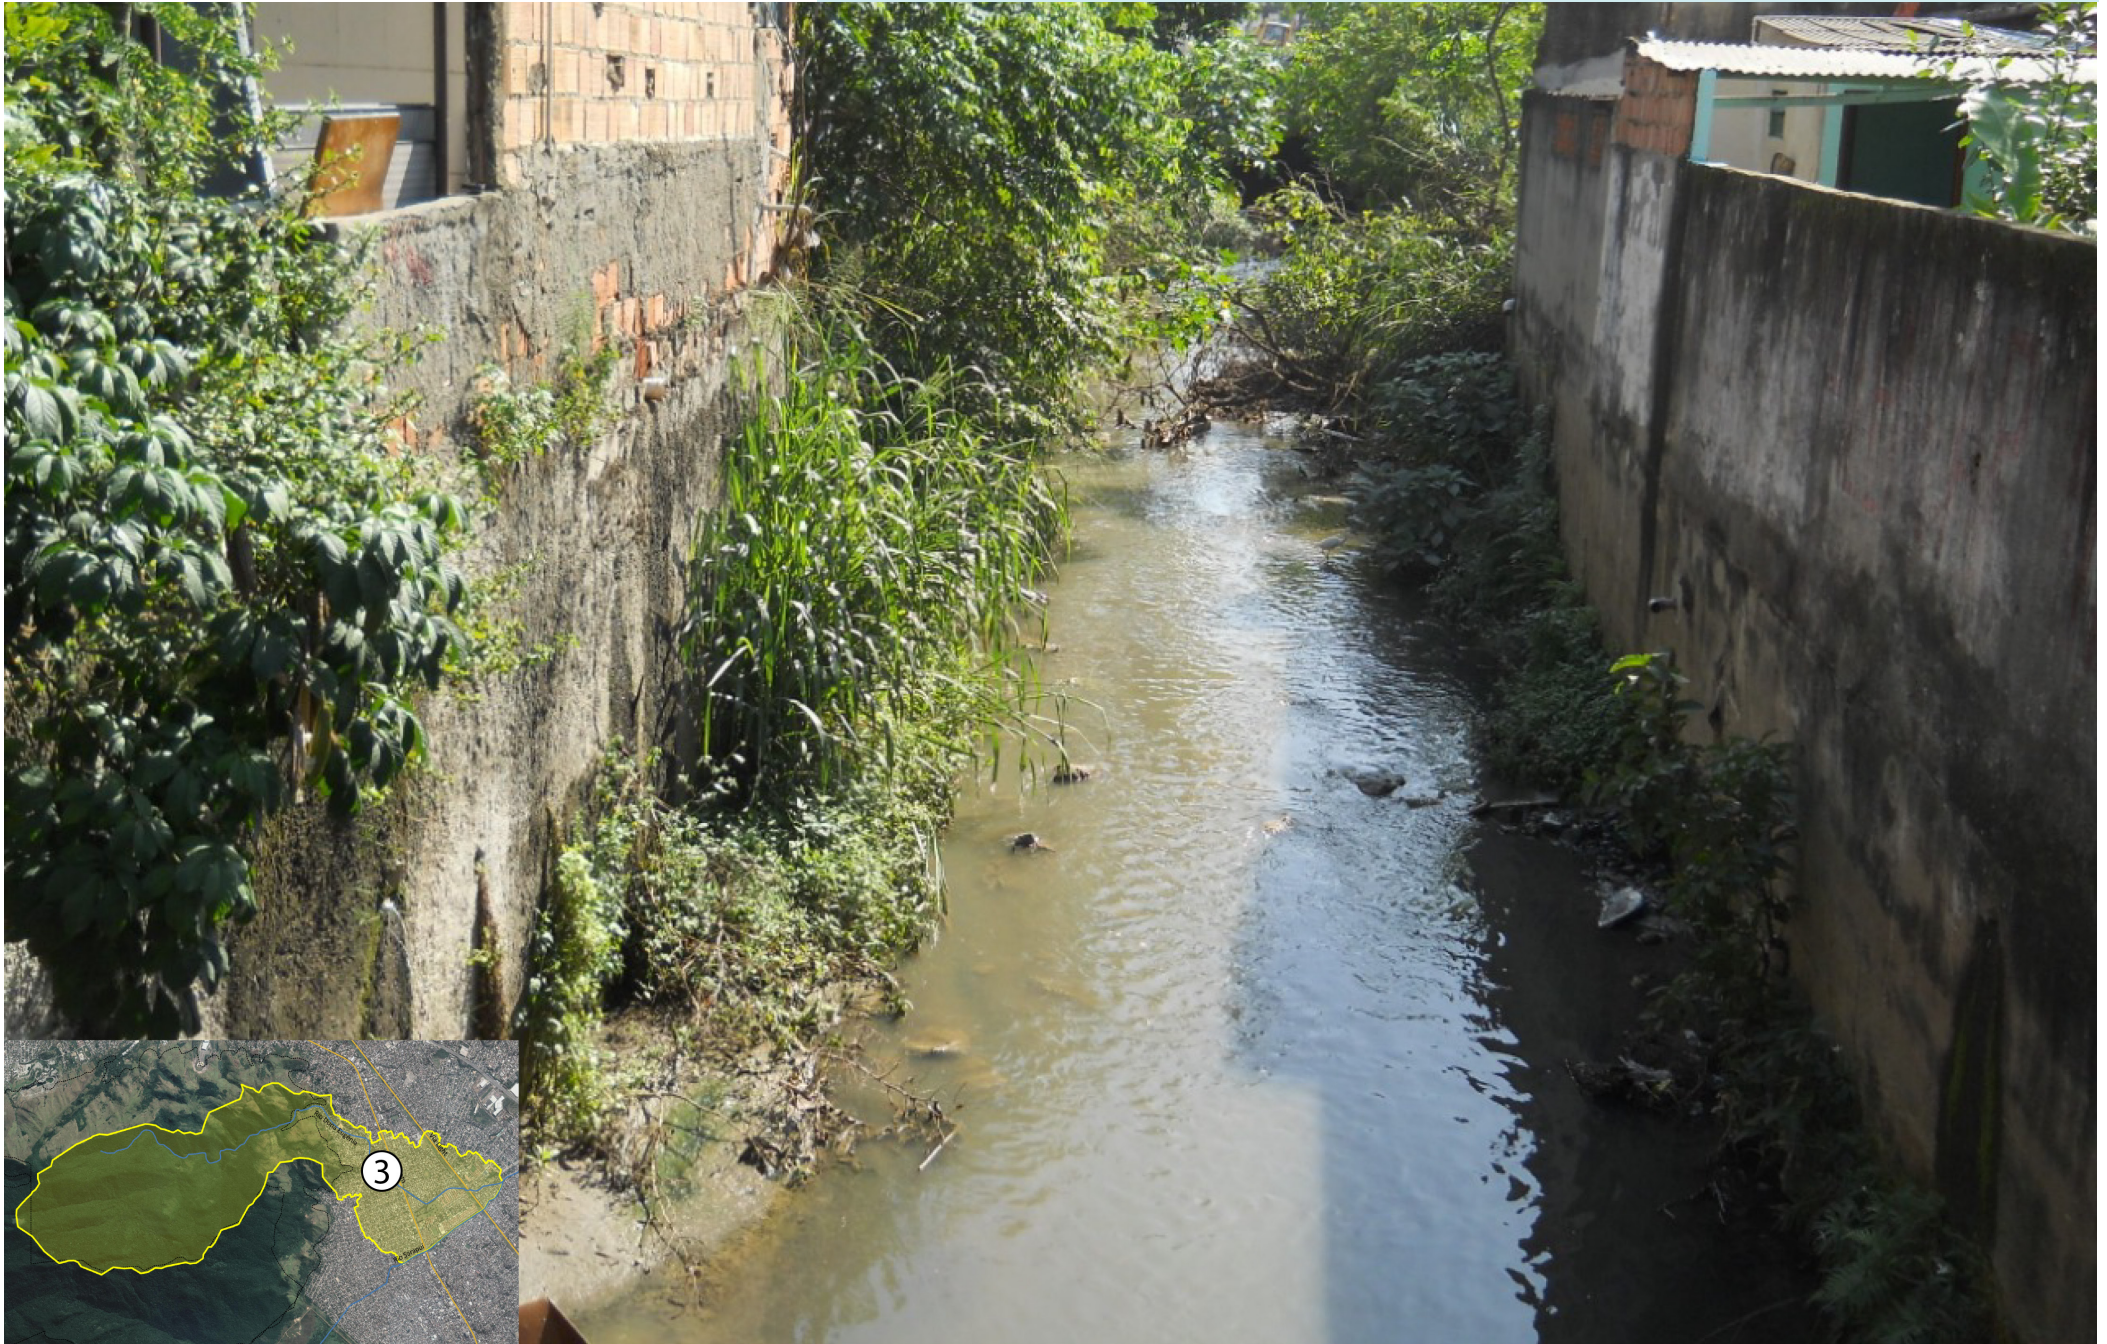



## The river downstream the railway

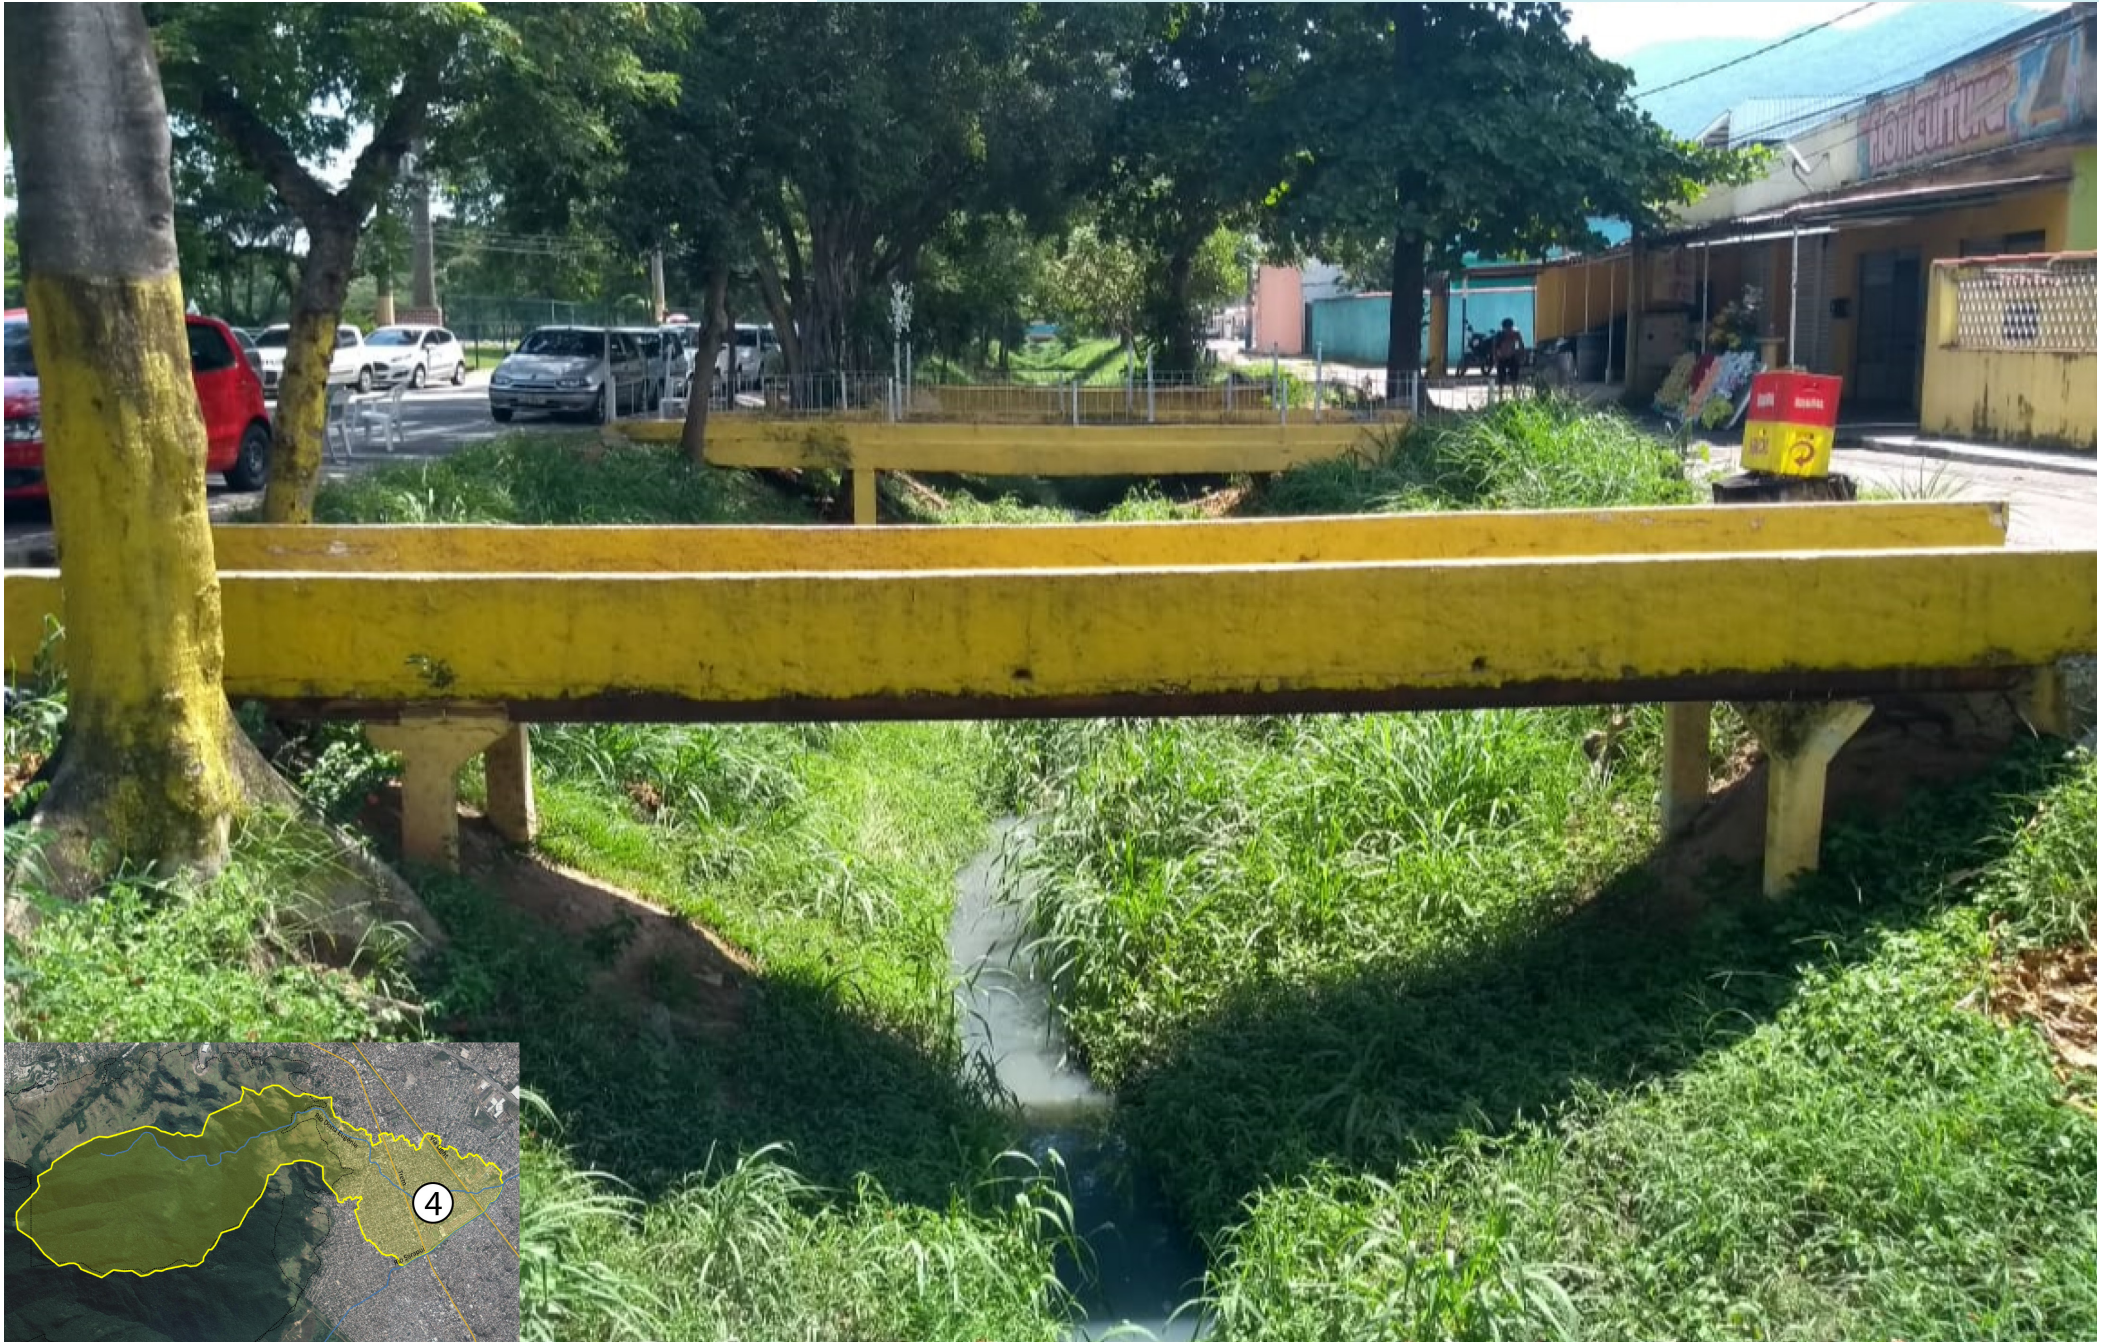



## Dona Eugênia River Mouth

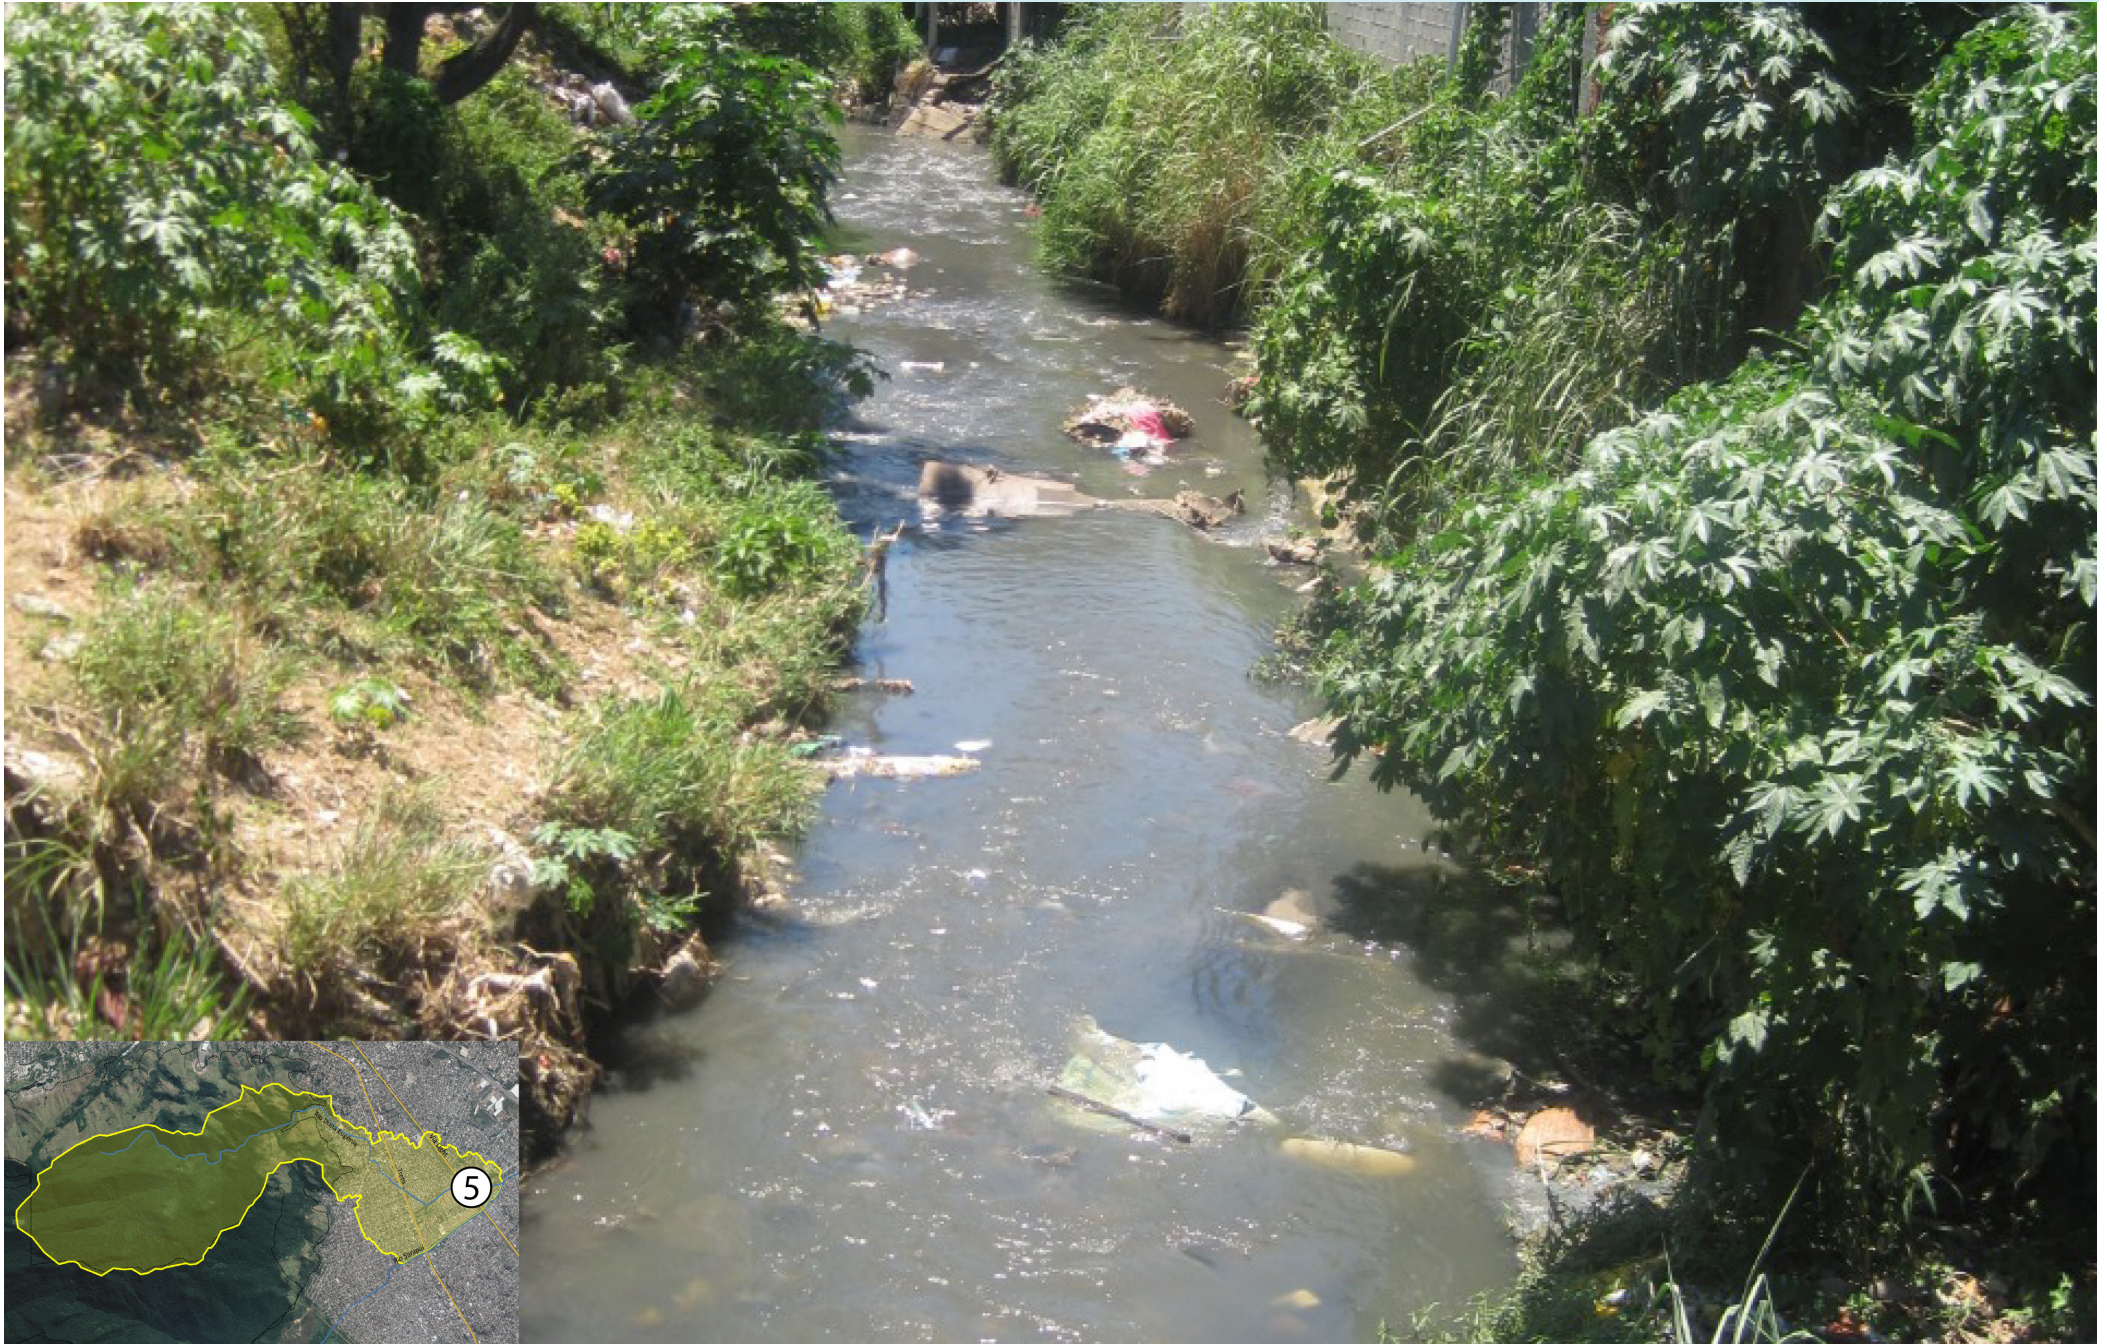



# A Systemic View

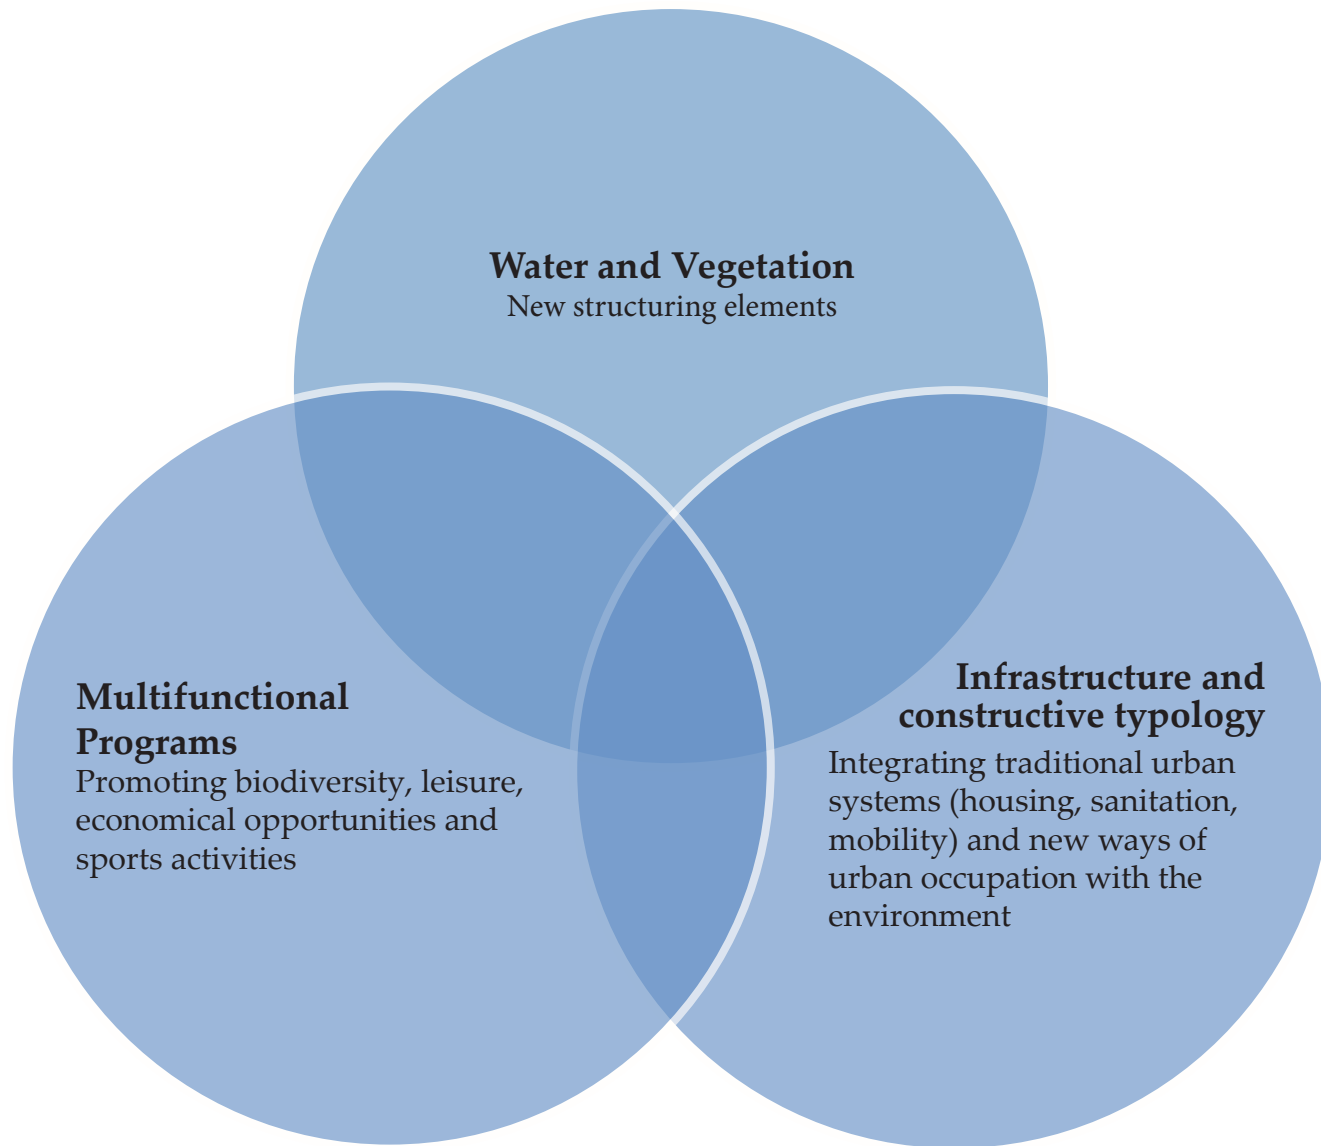



# Water

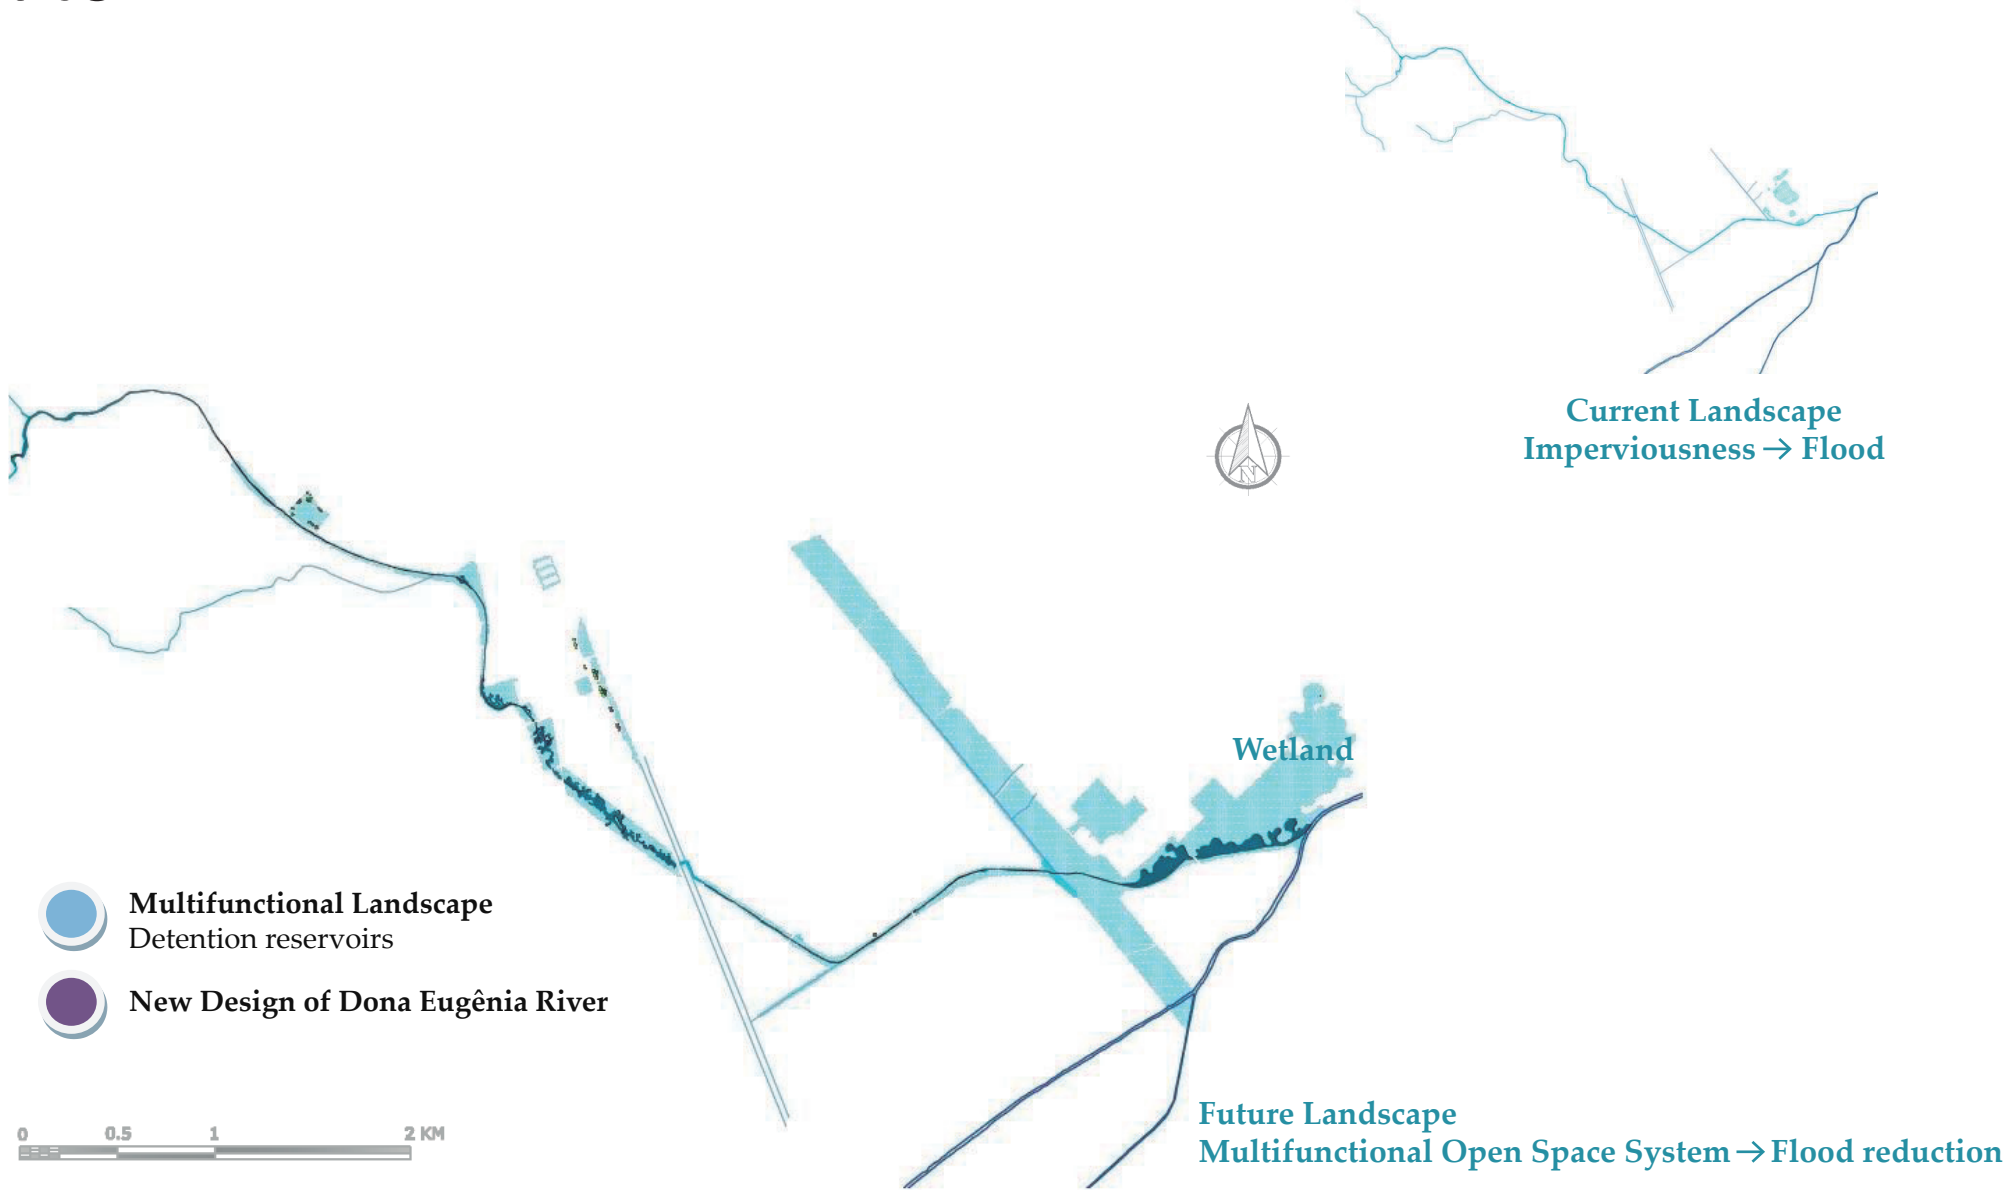

# Vegetation

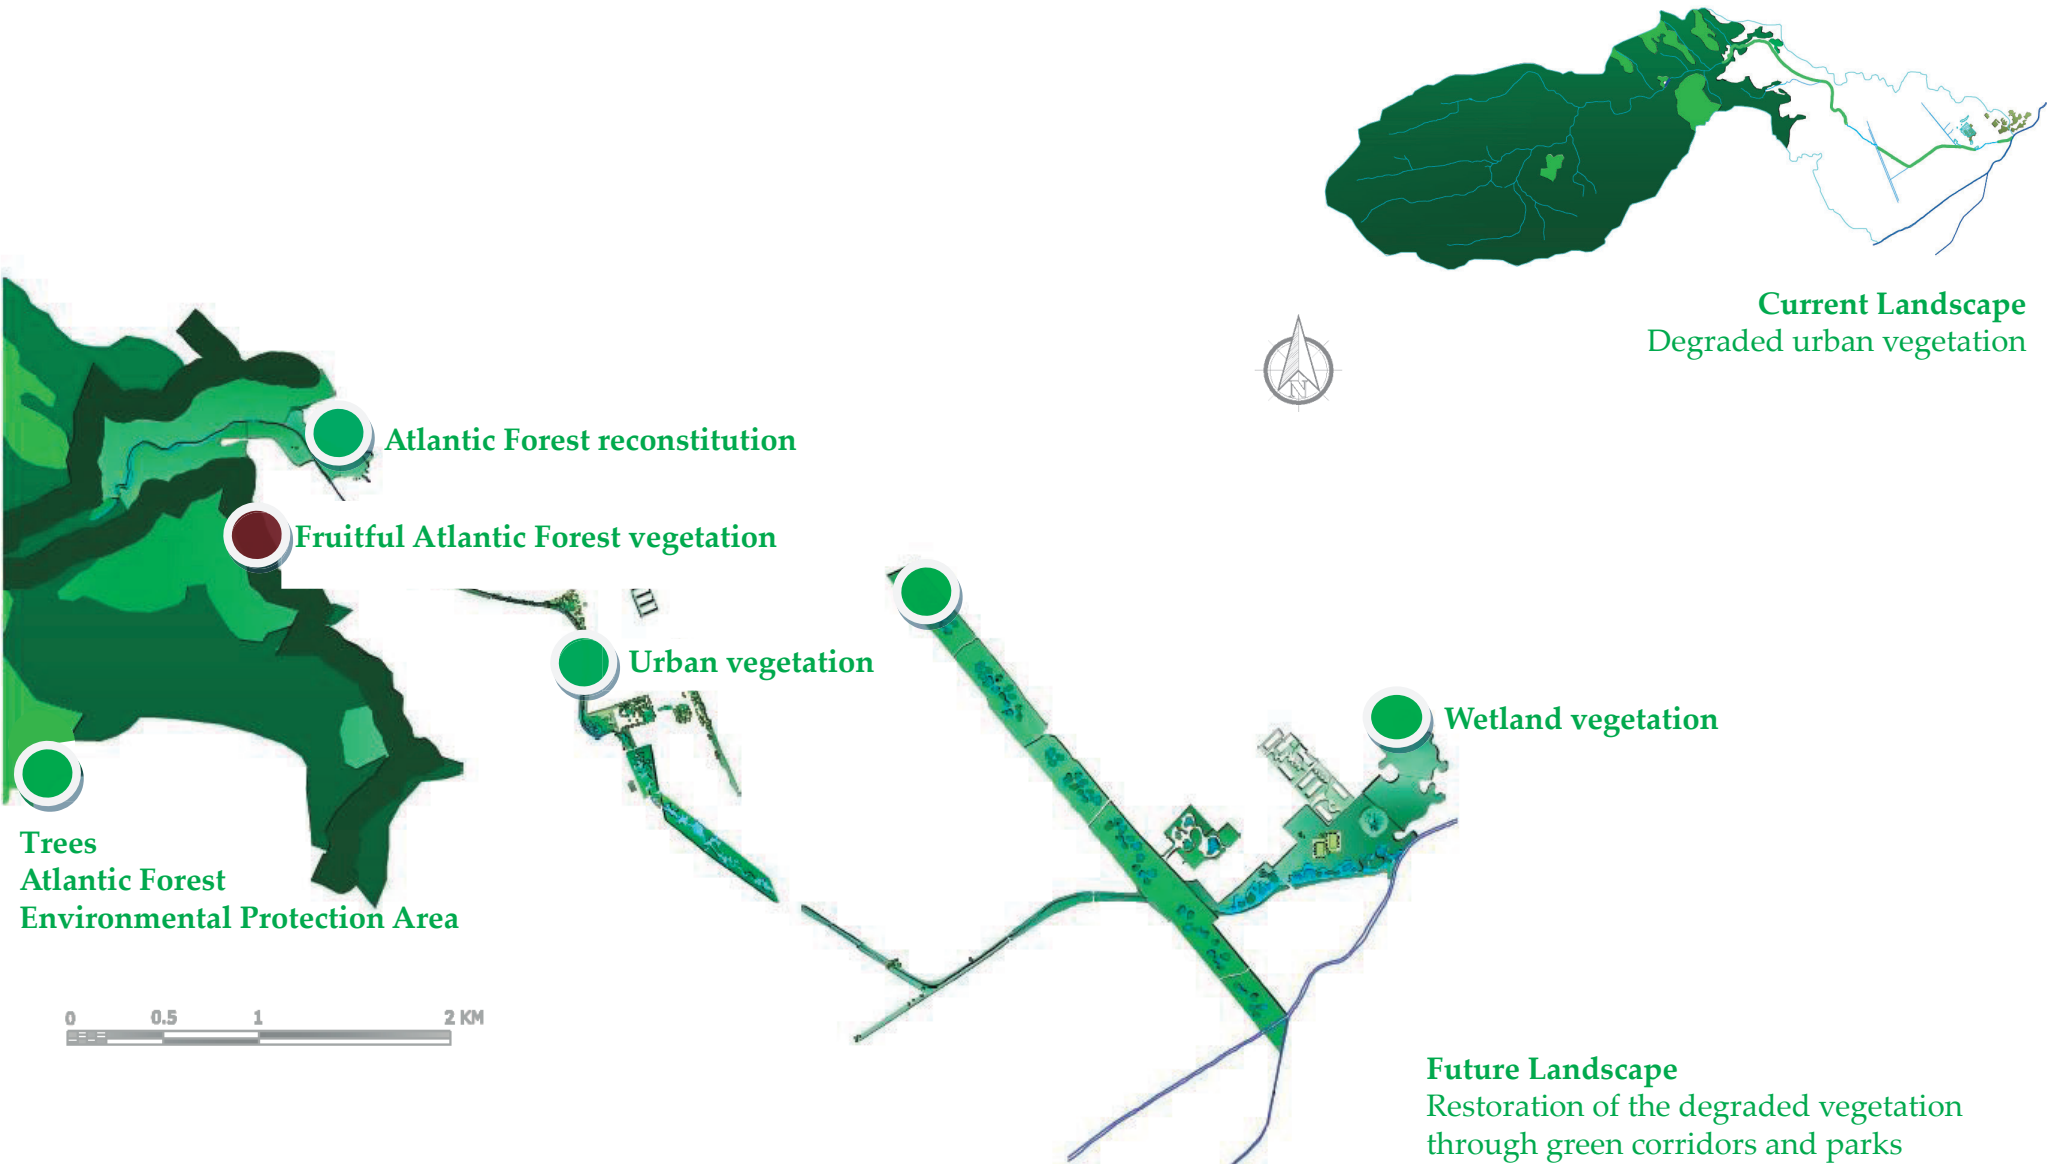

# Infrastructure - Services

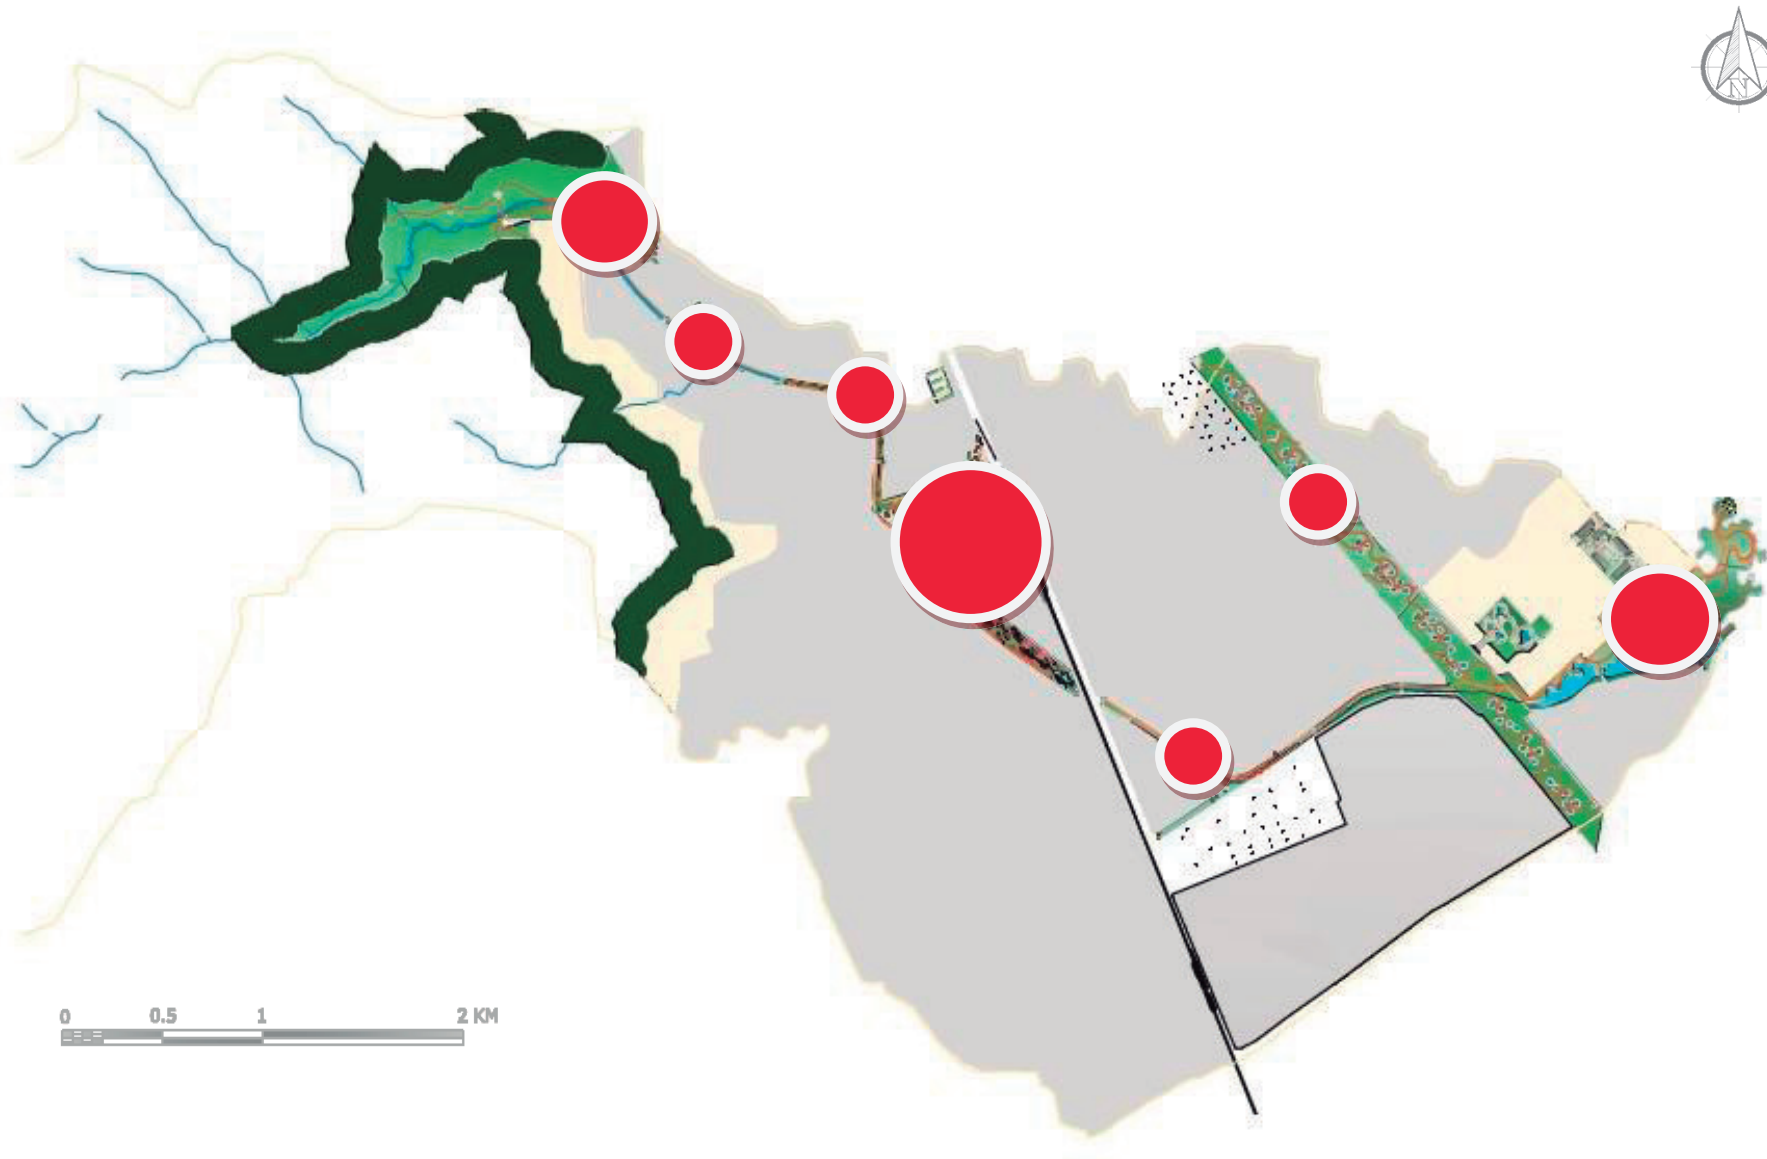

- Reestructuring of the comercial city center
- New business opportunities arising from revitalized city areas



# Infrastructure - Housing

- New settlements that consider the biophysical aspects, such as water, vegetation and soil original characteristics

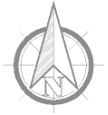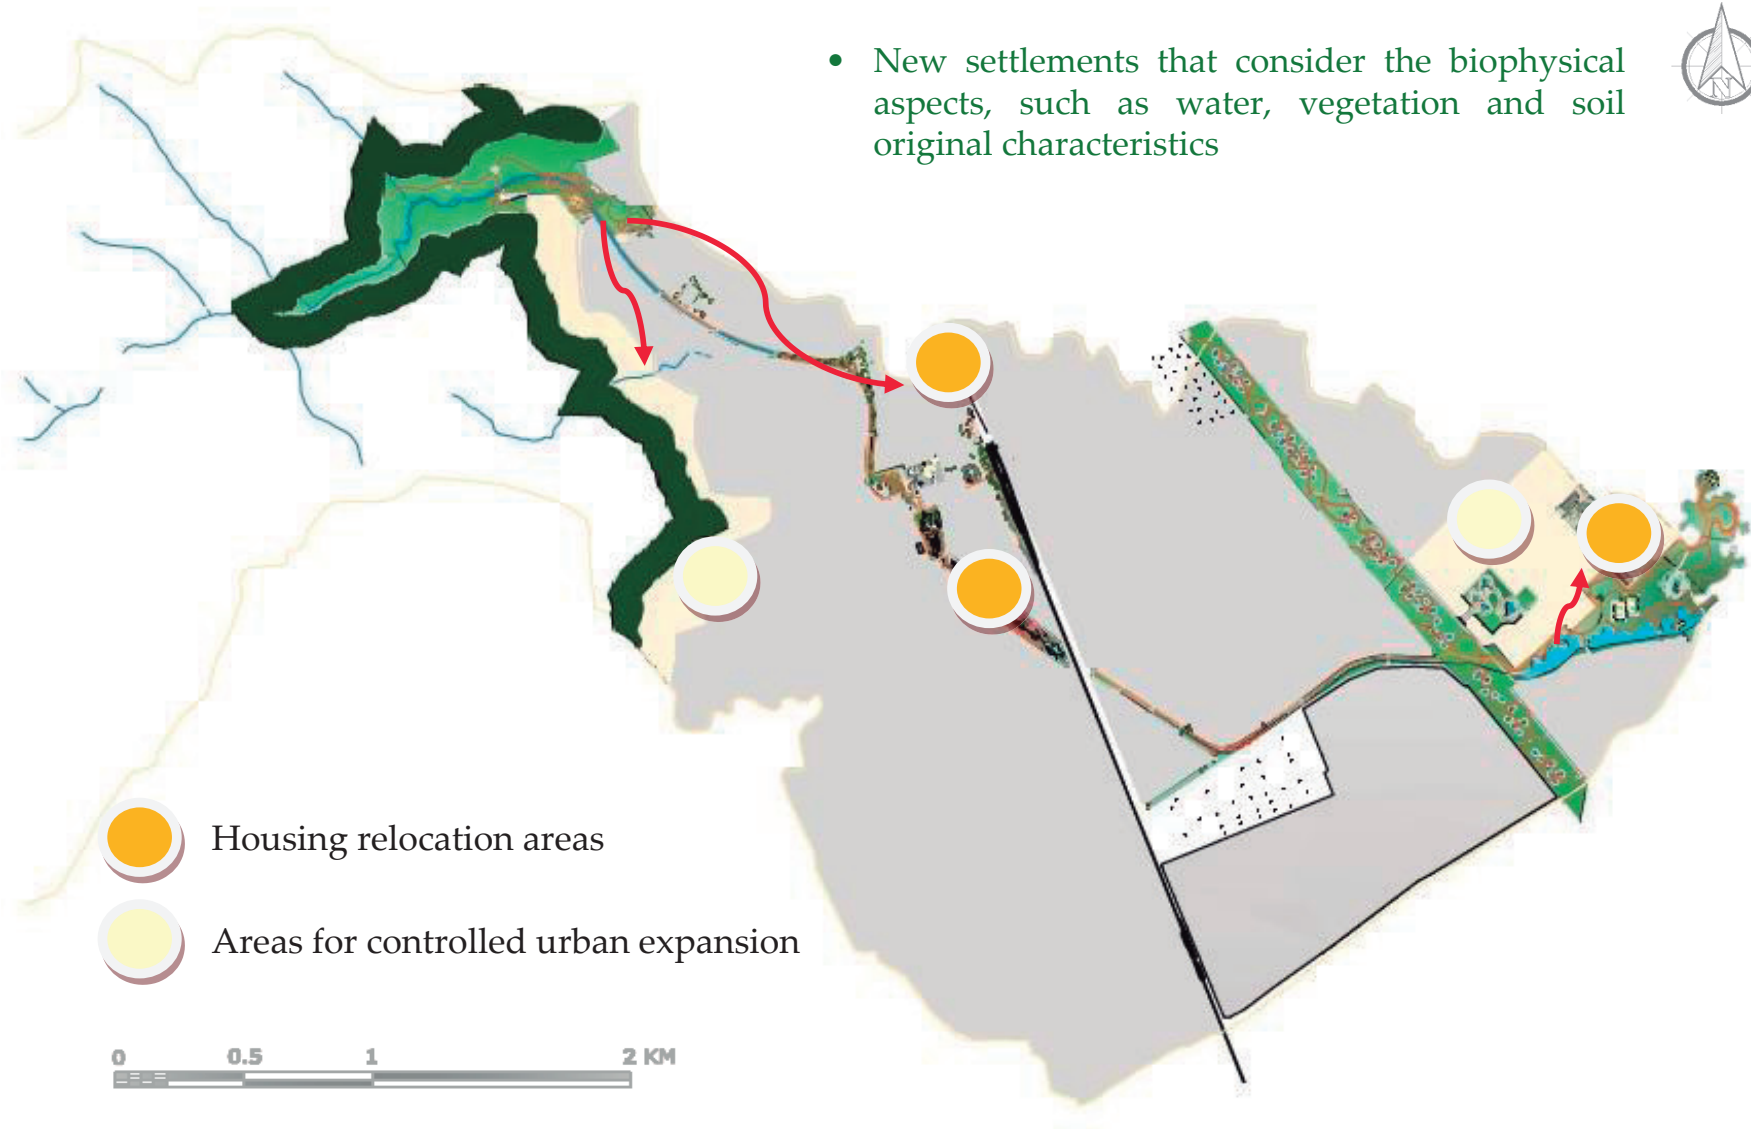

# Multifunctional Systems

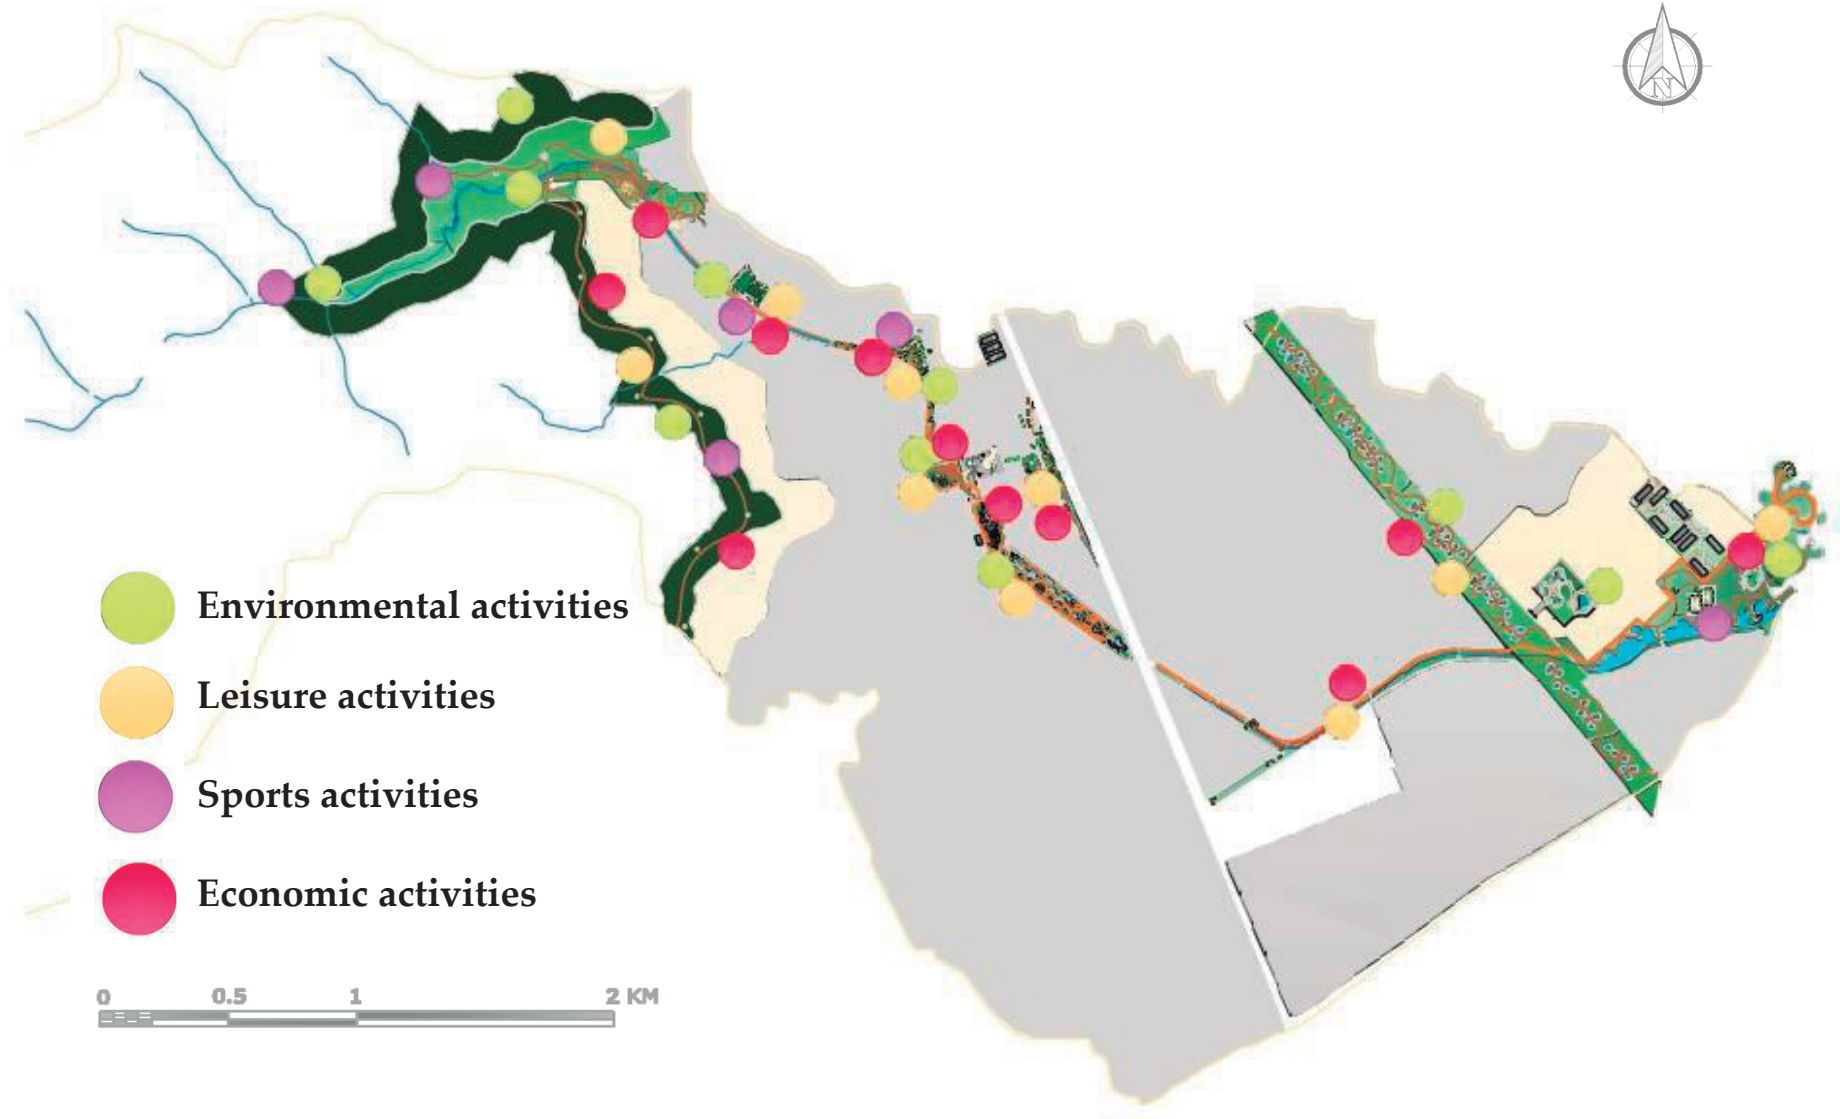



# Design Concept

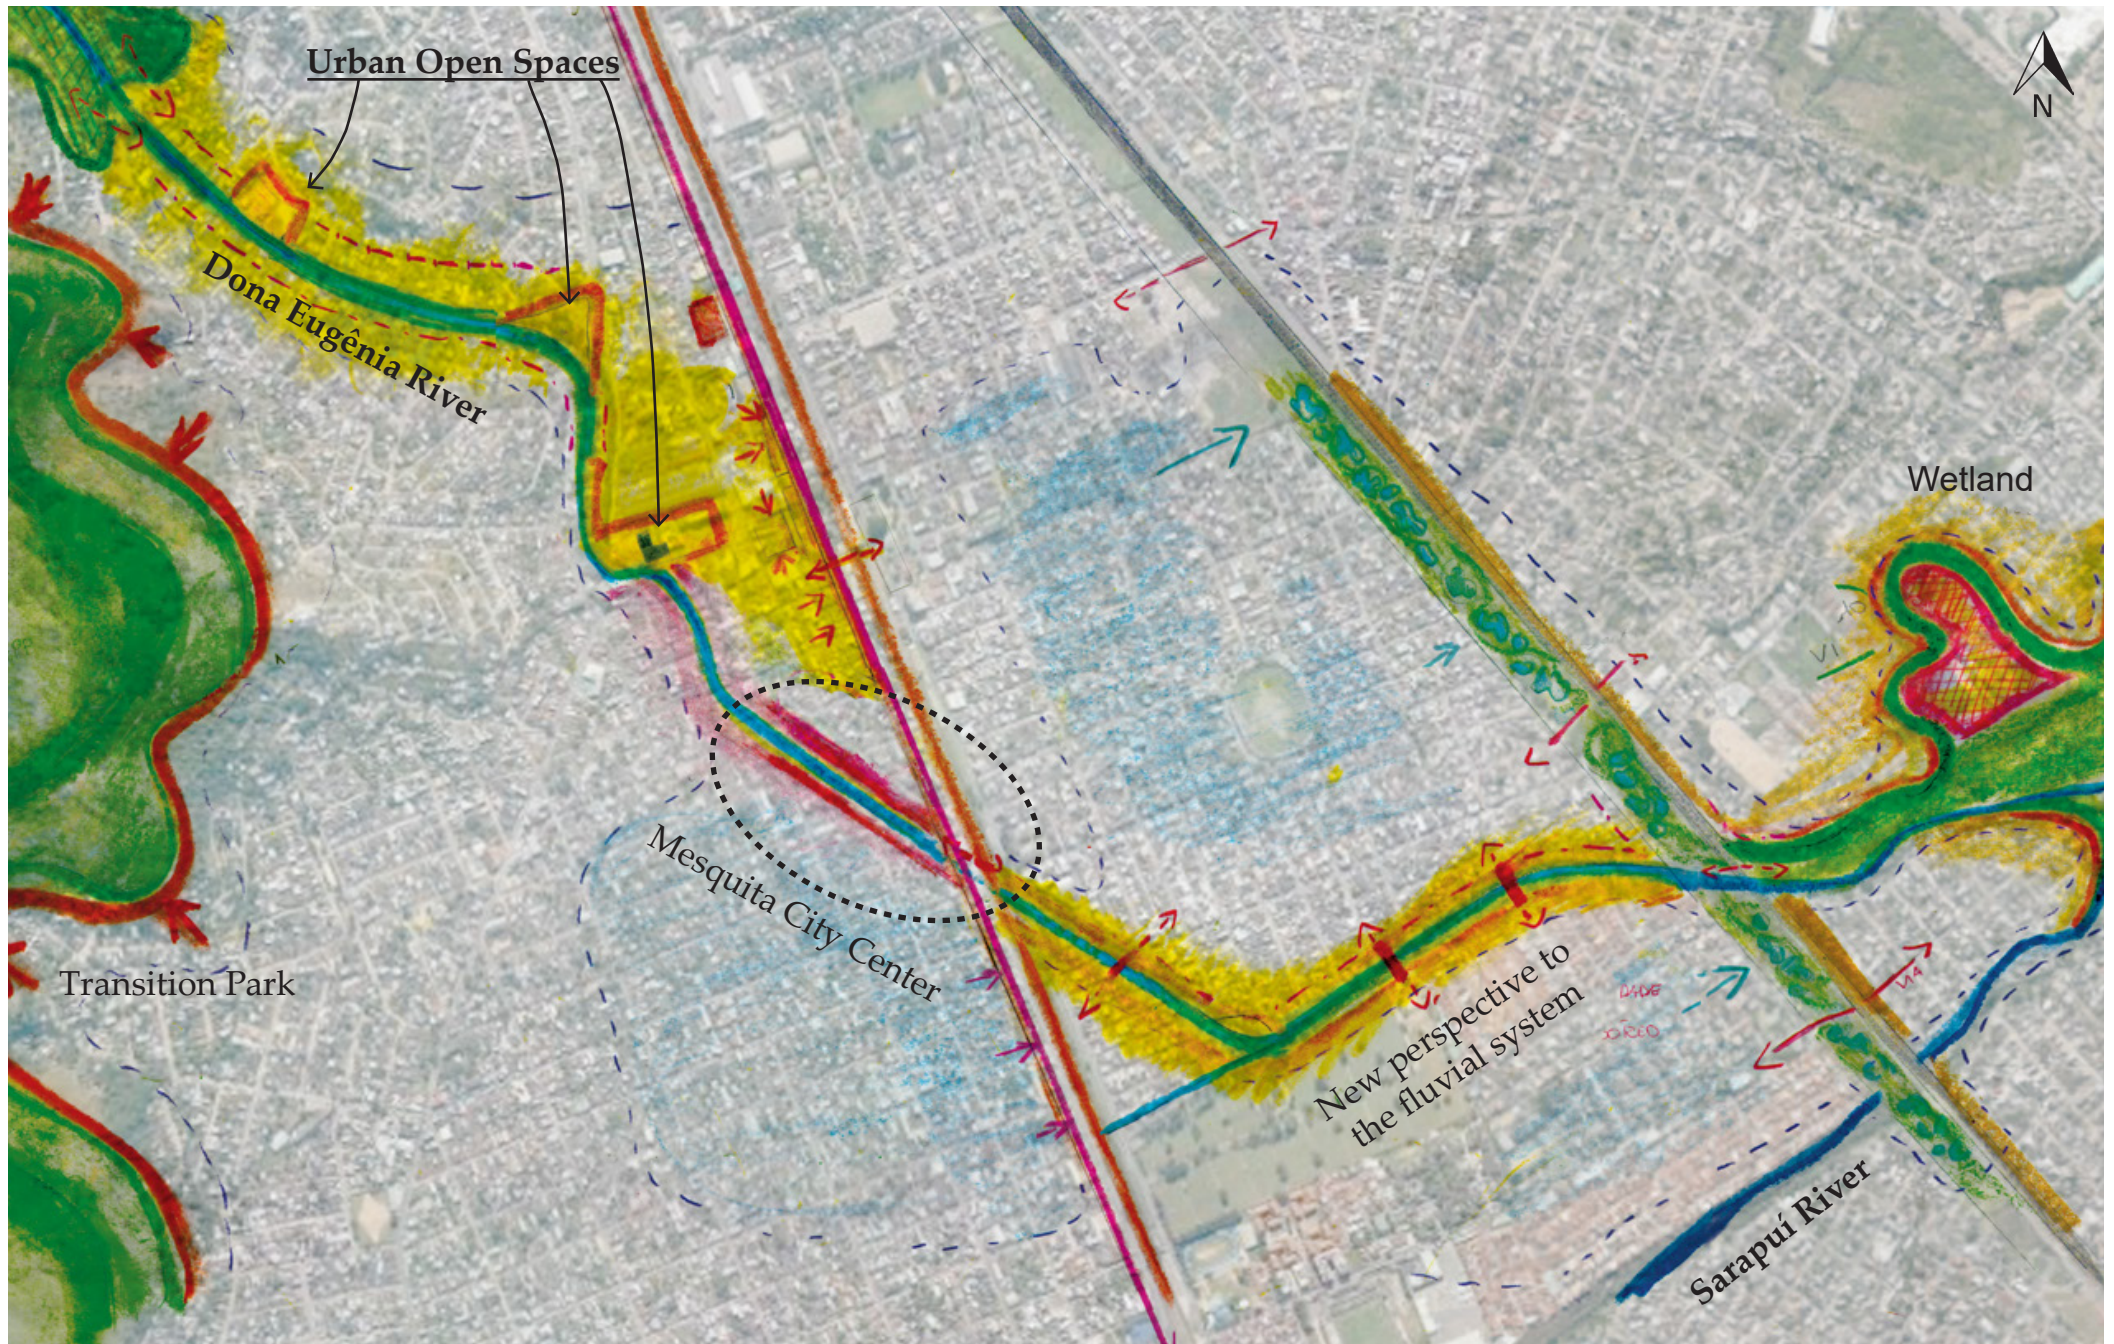



# Masterplan

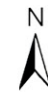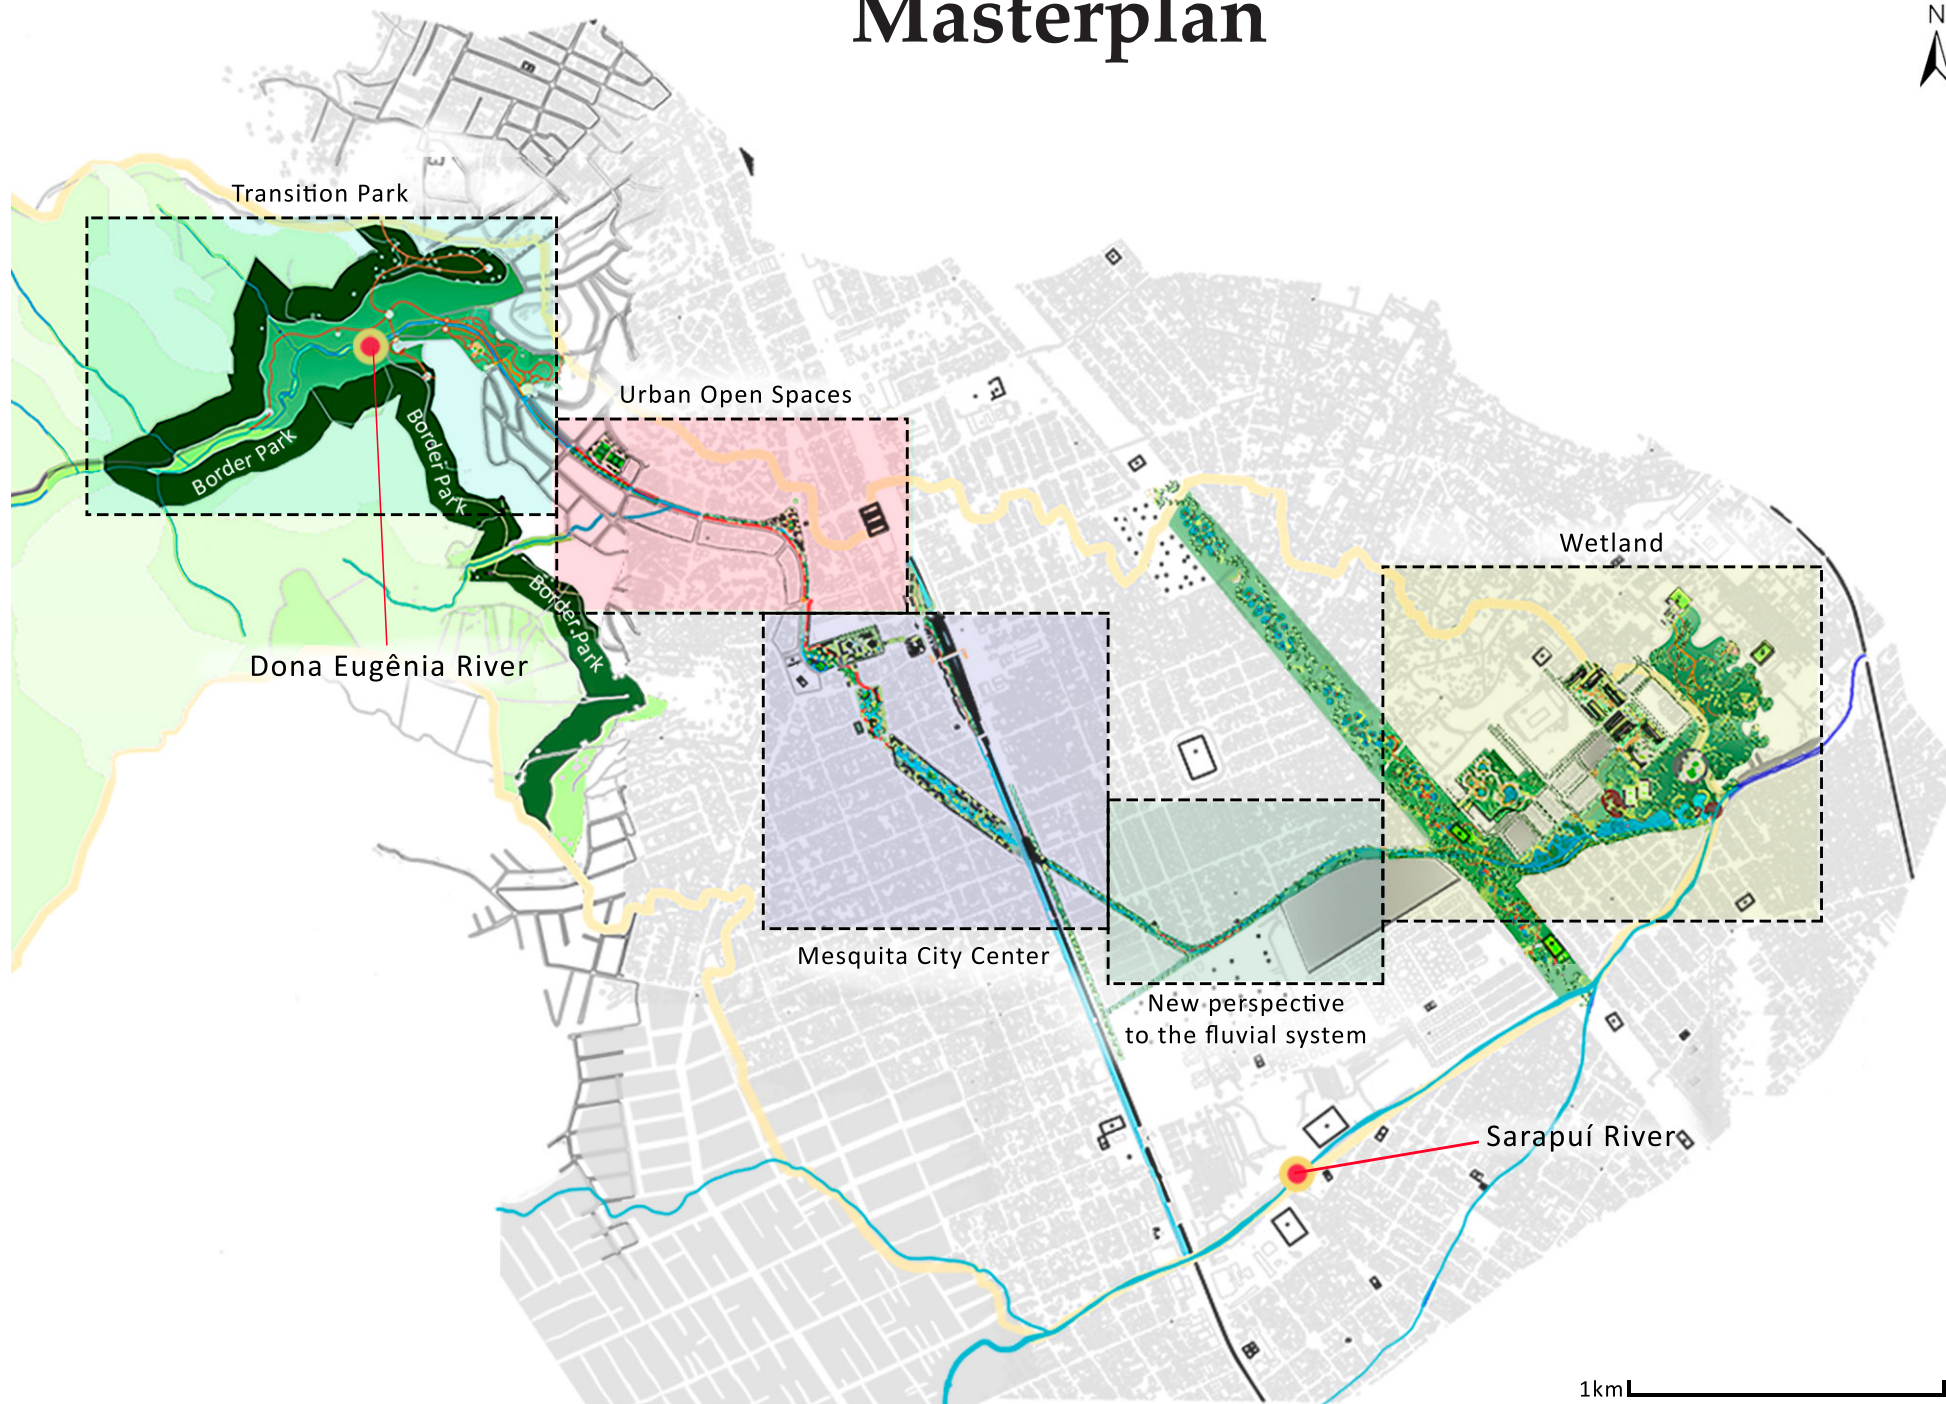

# Border Park/Transition Park Project

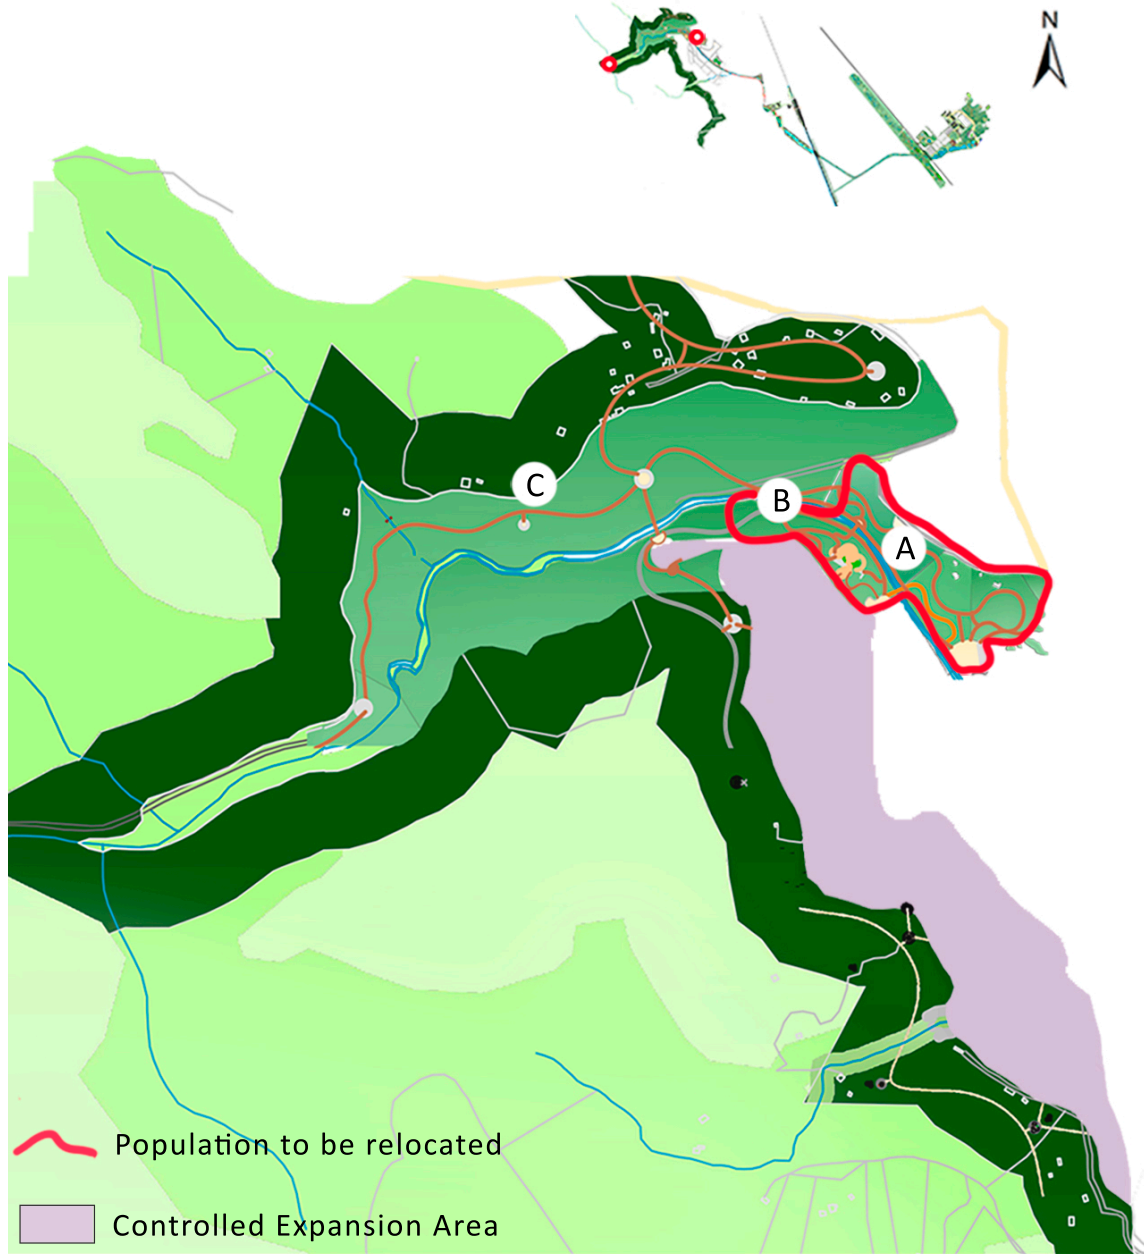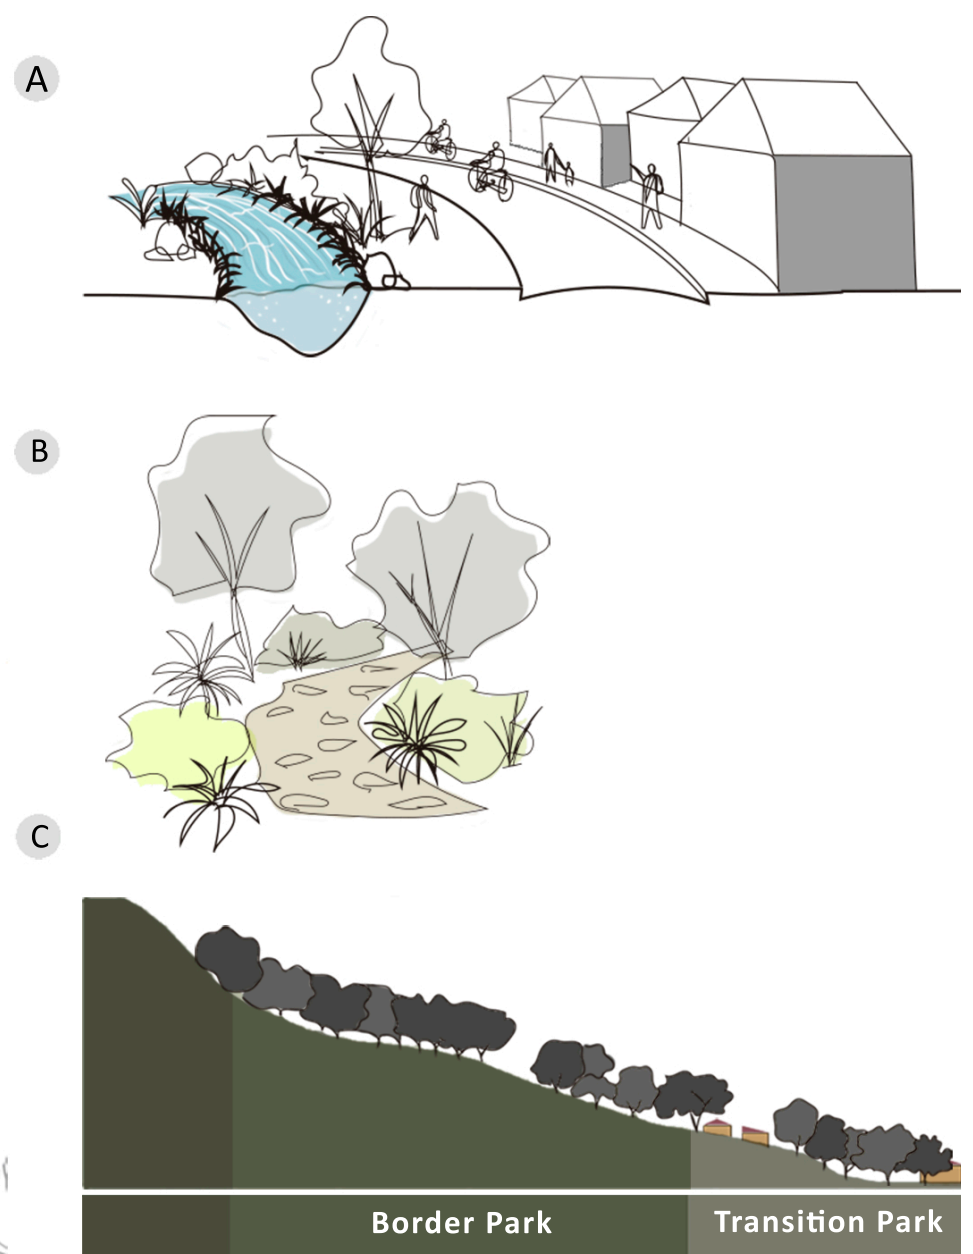



# Urban Open Spaces

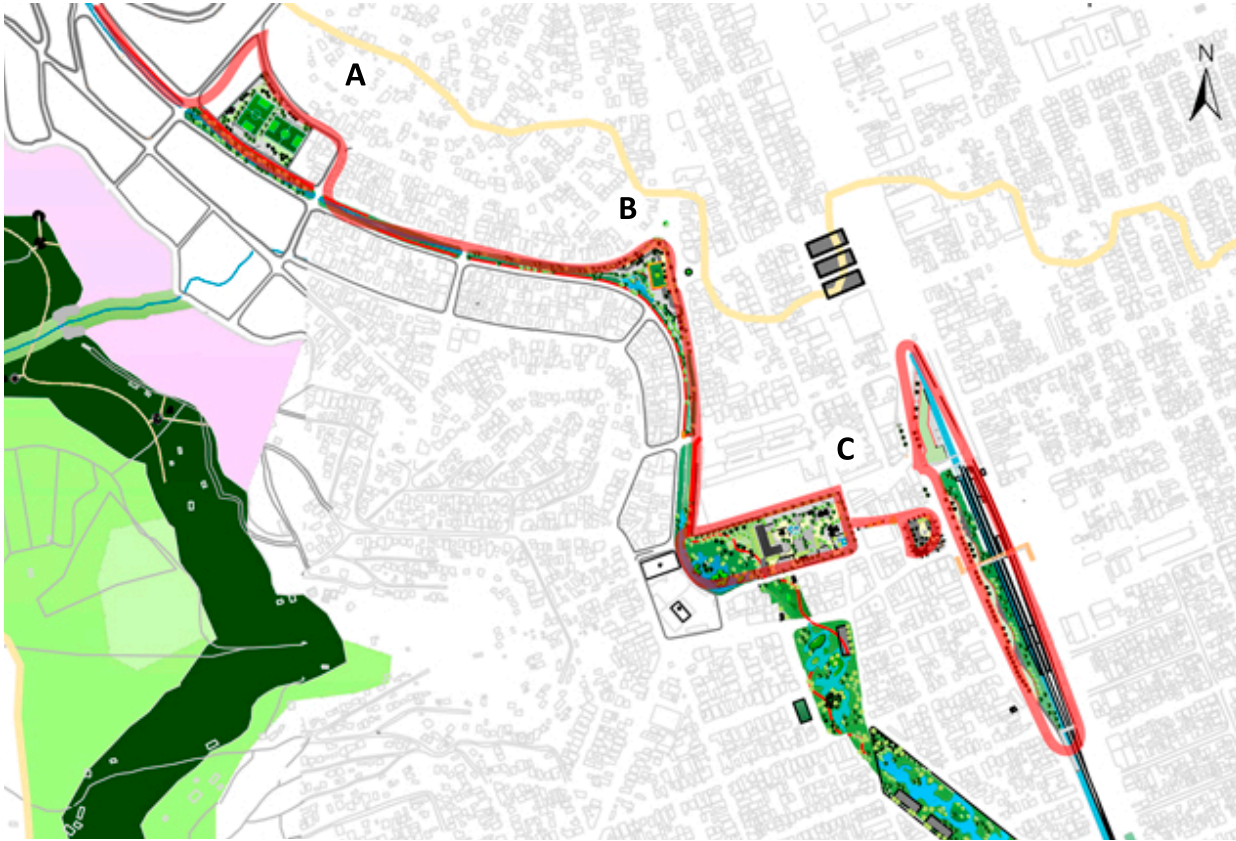

A Soccer Field

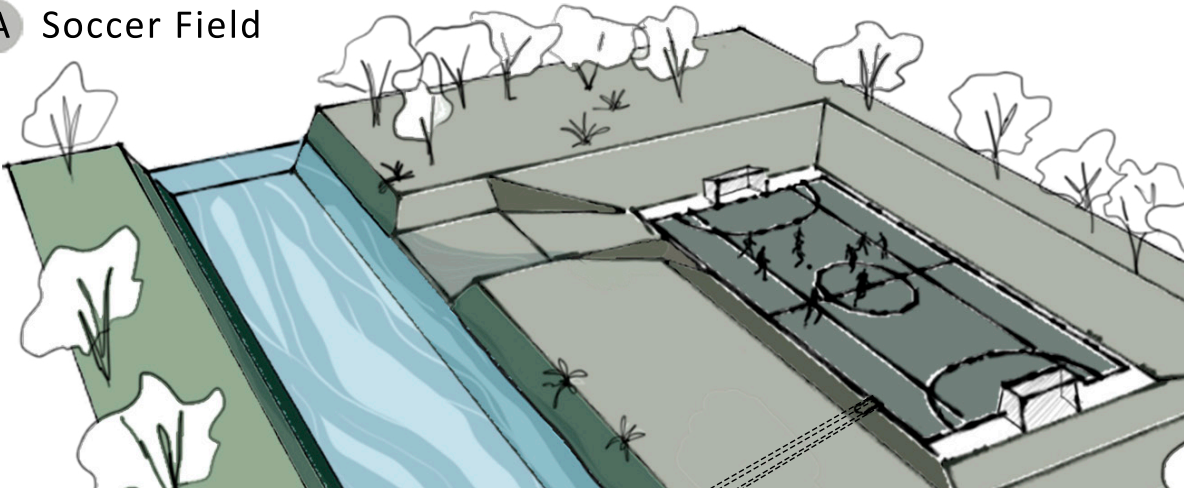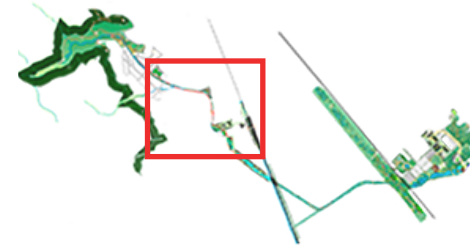

B Brazil Plaza

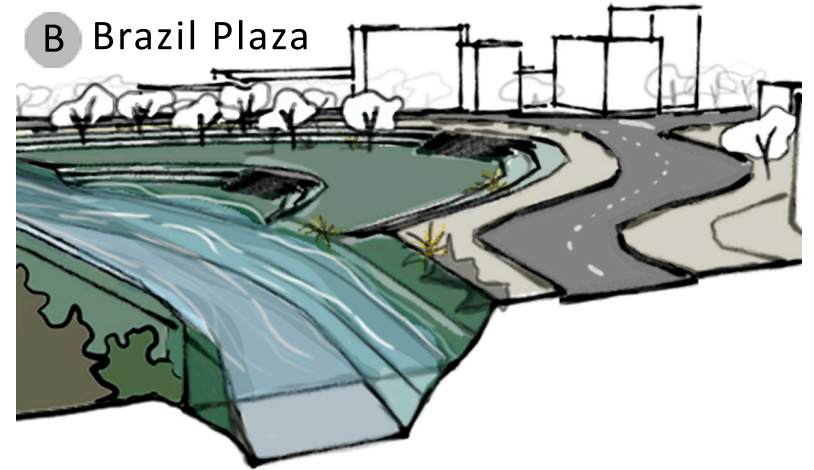

C Municipal Government Complex

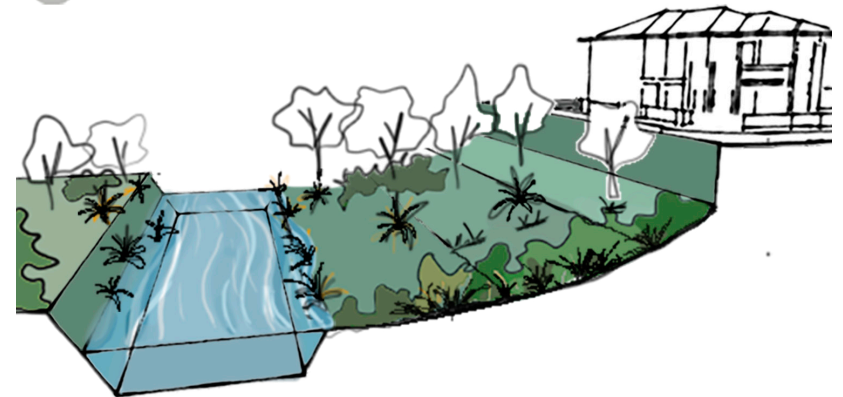

# Urban open Spaces - Soccer Field

A Soccer Field

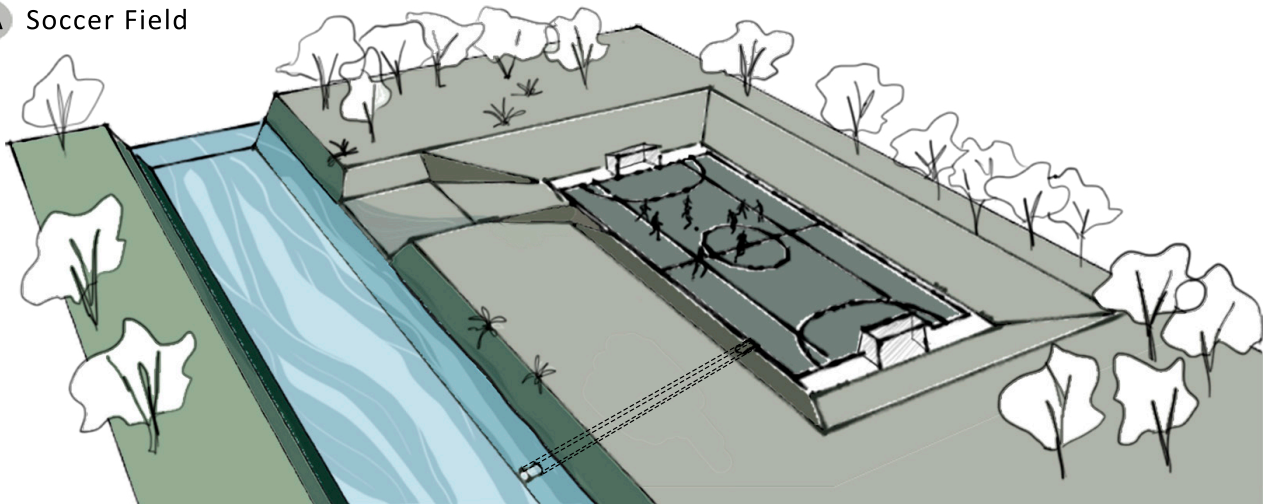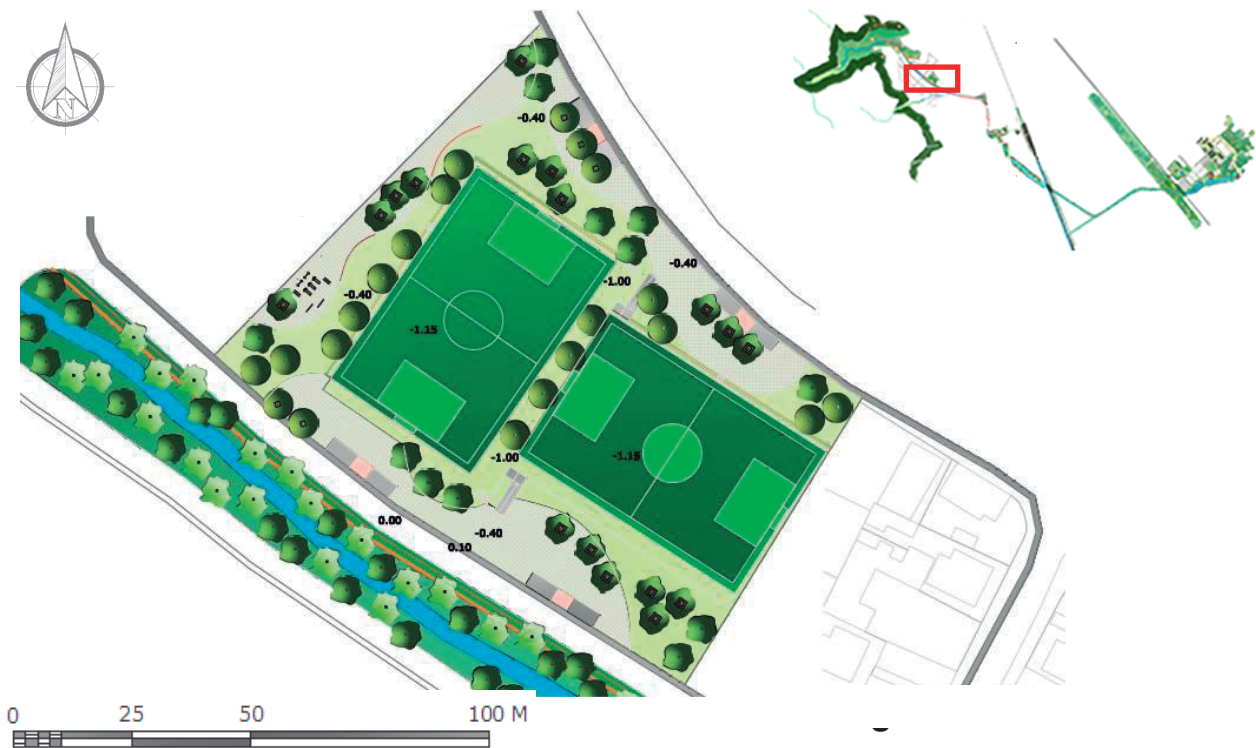

- The proposal calls for lowering the soccer field by 1.86 m concerning its original level, so it can function as a detention reservoir in high water periods.
- The water would exit the reservoir through a large pipe connected to the downstream reach. The river would be widened in this segment to handle the water from the reservoir in case of upstream overflow.
- The *depth x area x volume* curve of this reservoir is presented in the Table above, where the functional strip of the reservoir is indicated.

Depth x Area x Volume Curve – Soccer Field

| Depth (m) | Area (m <sup>2</sup> ) | Volume (m <sup>3</sup> ) |
|-----------|------------------------|--------------------------|
| 26.34     | 5,819                  | 0                        |
| 26.80     | 8,622                  | 3,321                    |
| 27.40     | 10,033                 | 8,917                    |
| 28.20     | 12,366                 | 17,877                   |
| 28.45     | 16,778                 | -                        |
| 30.00     | 16,778                 | -                        |



# Urban open Spaces - Brazil Plaza

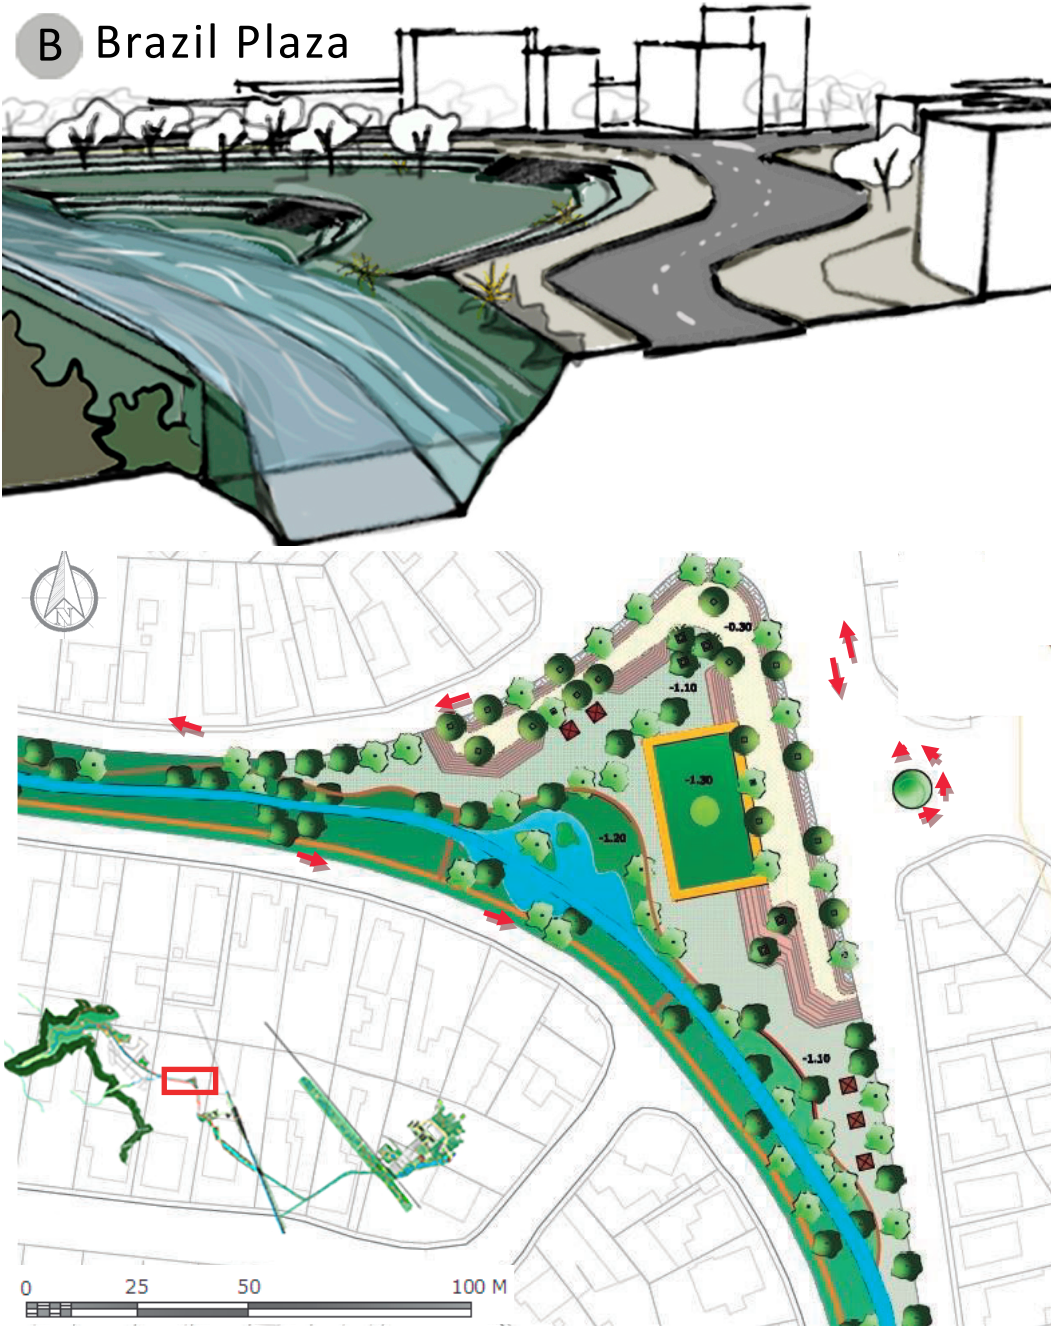

- The project also envisions the implementation of another detention reservoir, through lowering an existing public plaza called Brazil Plaza. It would not fill with water during light precipitation, would start to be flooded during stronger and/or more prolonged rainfall, and would fill almost totally during heavy rainstorms (design precipitation).
- This configuration facilitates the multifunctionality of the plaza, which would be unaffected by rain most of the time, providing a landscaped space for leisure, so that it would only require cleanup after sporadic events with large magnitude.
- The *depth x area x volume* curve data of this reservoir is presented in the Table above, with a highlight on the functional strip of the reservoir.

*Depth x Area x Volume Curve – Brazil Plaza*

| Depth (m) | Area (m <sup>2</sup> ) | Volume (m <sup>3</sup> ) | Remarks               |
|-----------|------------------------|--------------------------|-----------------------|
| 19.80     | 2,080                  | -                        | River bottom          |
| 20.80     | 4,480                  | 0                        | Limit of the channel  |
| 21.30     | 6,600                  | 2,770                    | Limit of the plaza    |
| 21.90     | 8,650                  | -                        | Level of urbanization |

# Urban open Spaces - Municipal Government Complex

## C Municipal Government Complex

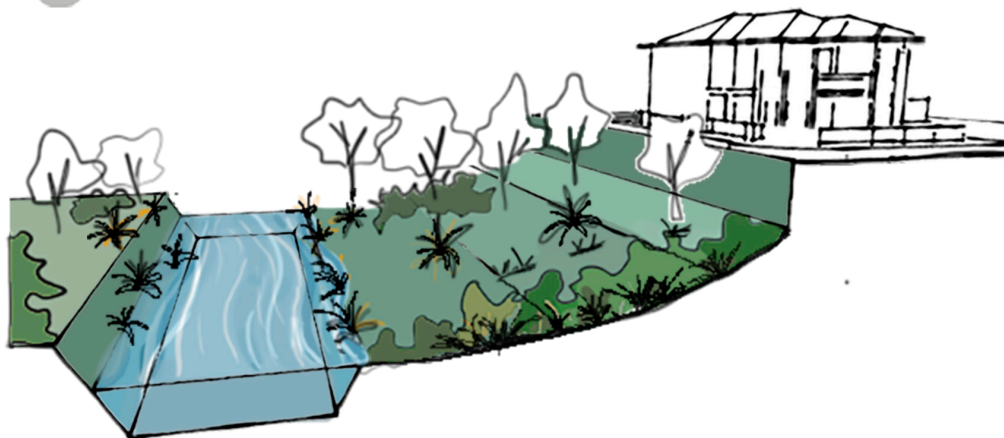

- The region where the buildings of the Mesquita municipal government are located, in the downtown region, would be beautified through landscaping in the front areas, also to increase infiltration.
- The reach of the river in this region, which is now channeled, would be opened to allow it to overflow on the left bank, where there is uninhabited land.
- The final depth x area x volume curve data is reported in the Table above, where the functional strip of the reservoir is highlighted.

Depth x Area x Volume Curve – Municipal Government Complex

| Depth (m) | Area (m <sup>2</sup> ) | Volume (m <sup>3</sup> ) | Remarks                    |
|-----------|------------------------|--------------------------|----------------------------|
| 17.38     | 3,481                  | -                        | River bottom               |
| 18.38     | 6,962                  | 0                        | Limit of the channel       |
| 20.00     | 6,962                  | 11,278                   | Overflow to the urban area |

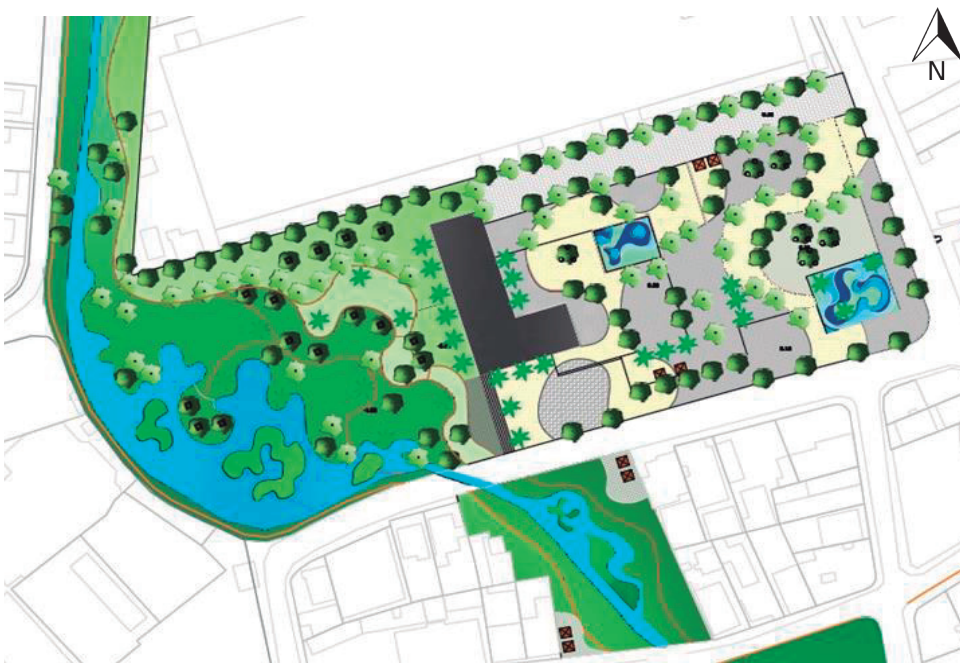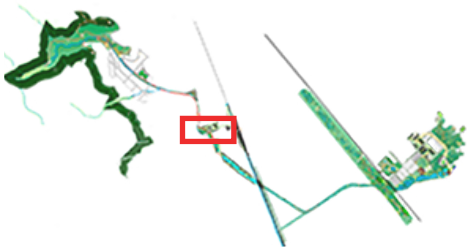



# Mesquita City Center

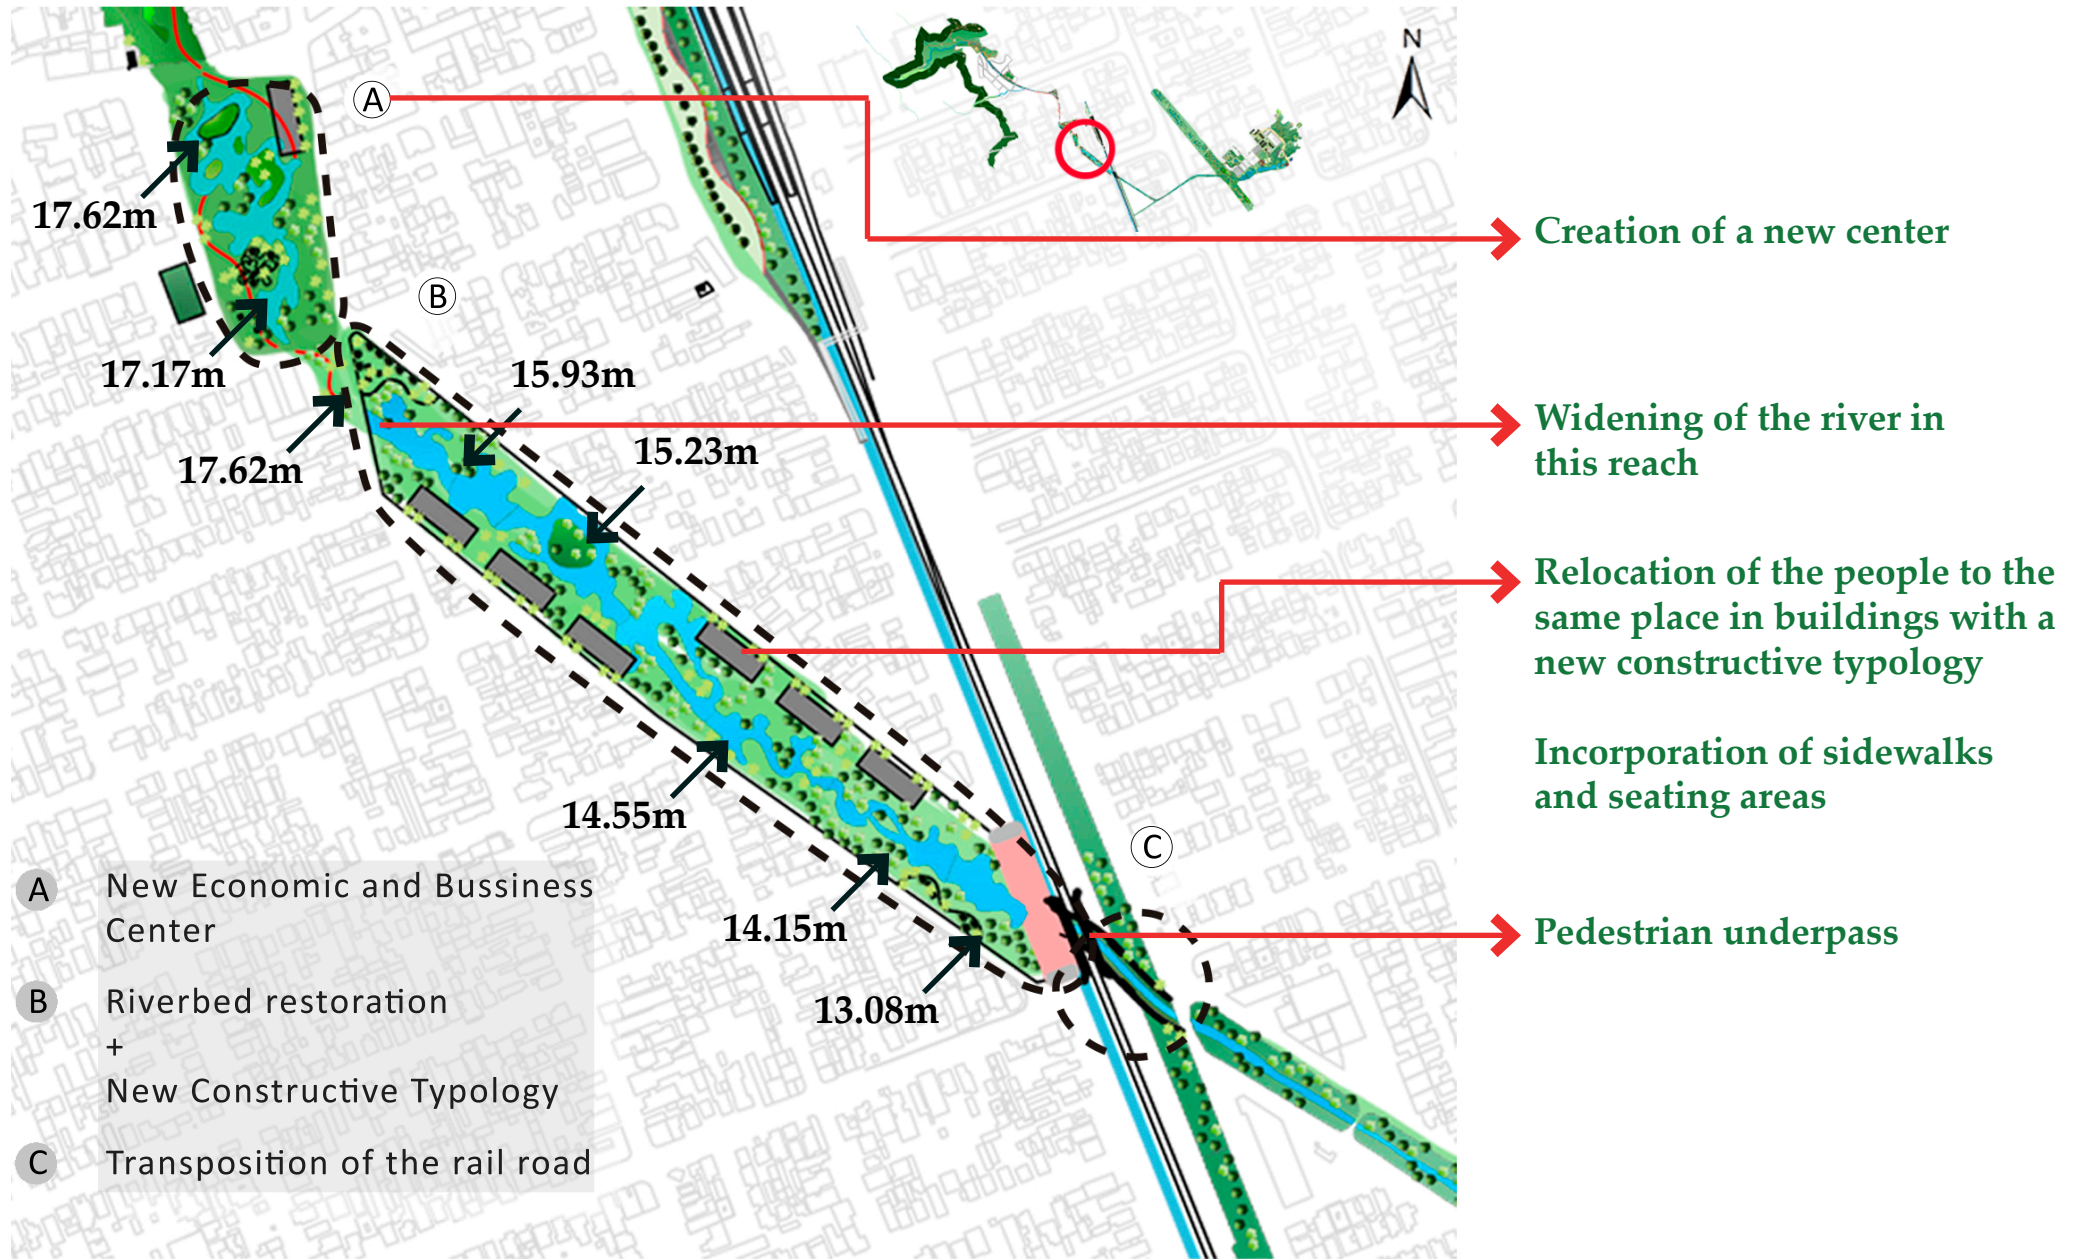



# Mesquita City Center

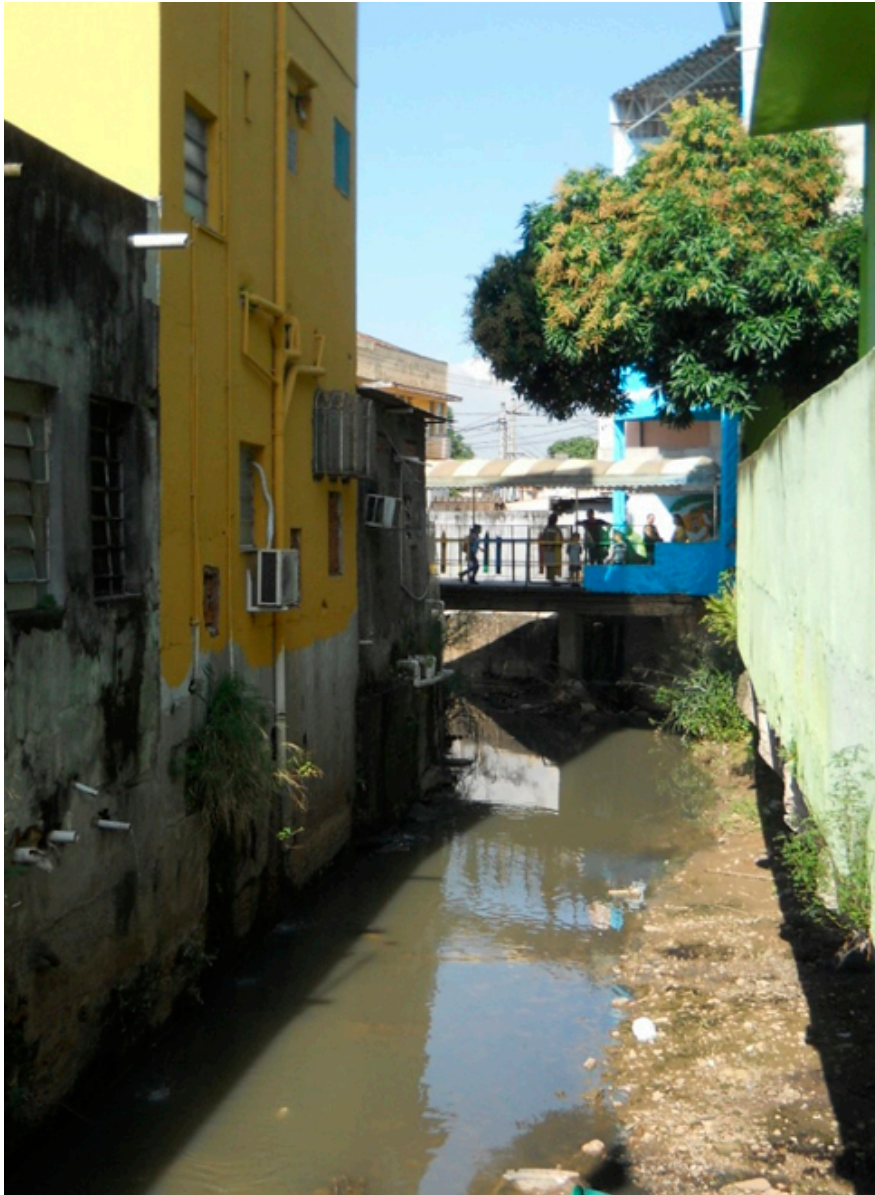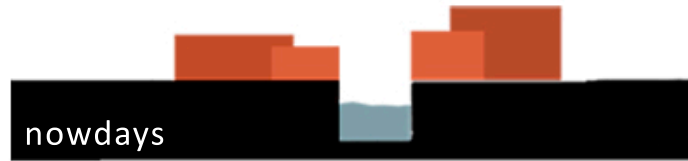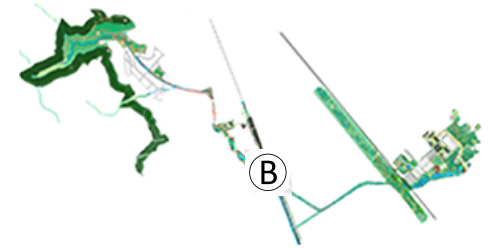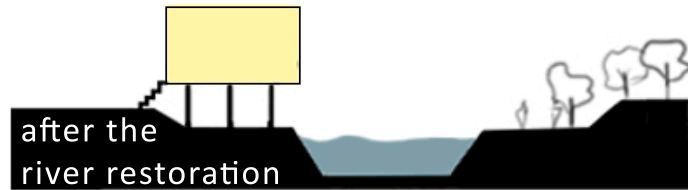

B

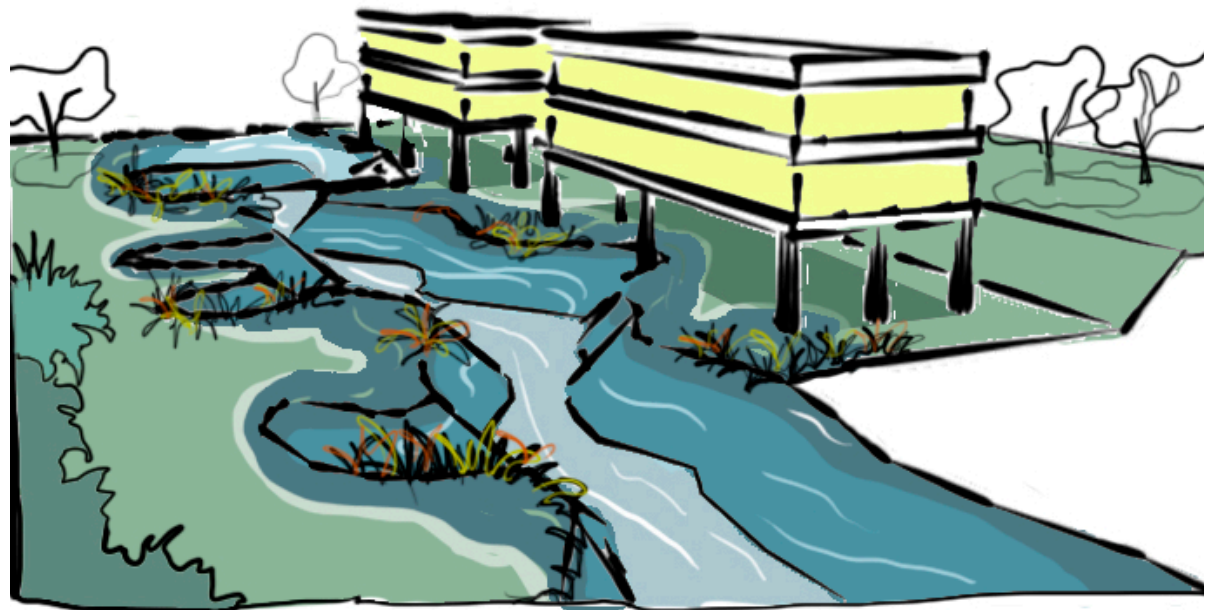



# A new perspective for the fluvial system

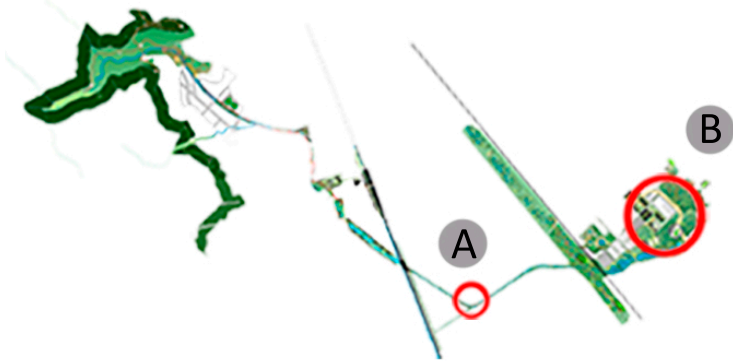

Suspended walkway allowing  
the observation and perception of  
the river from above - a different  
perspective from everyday life

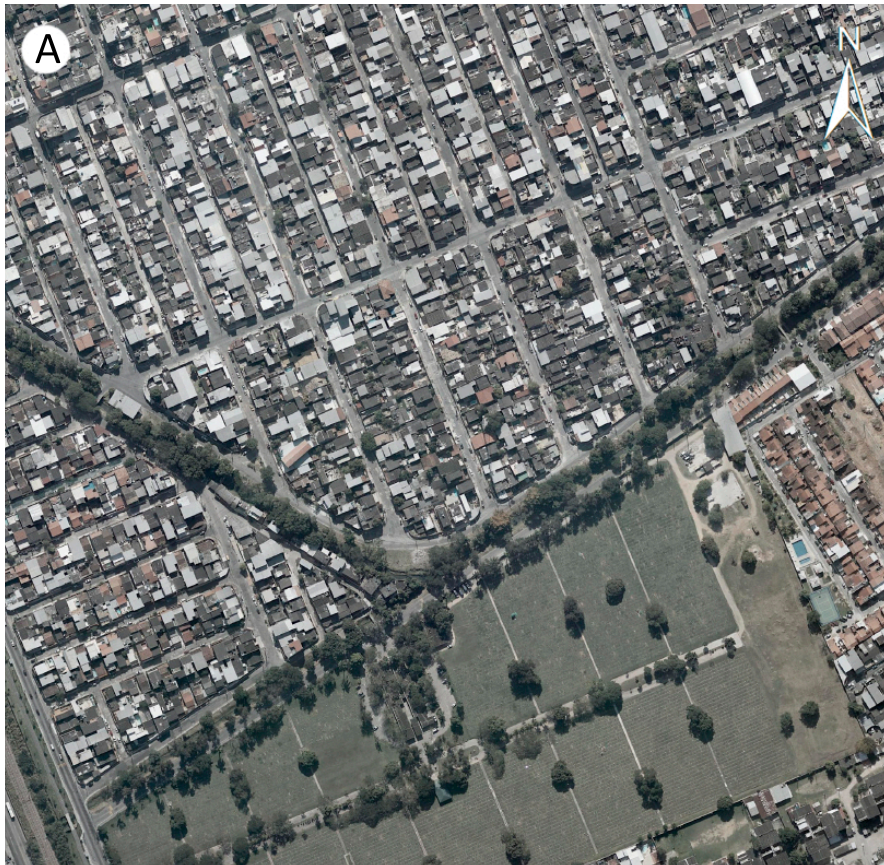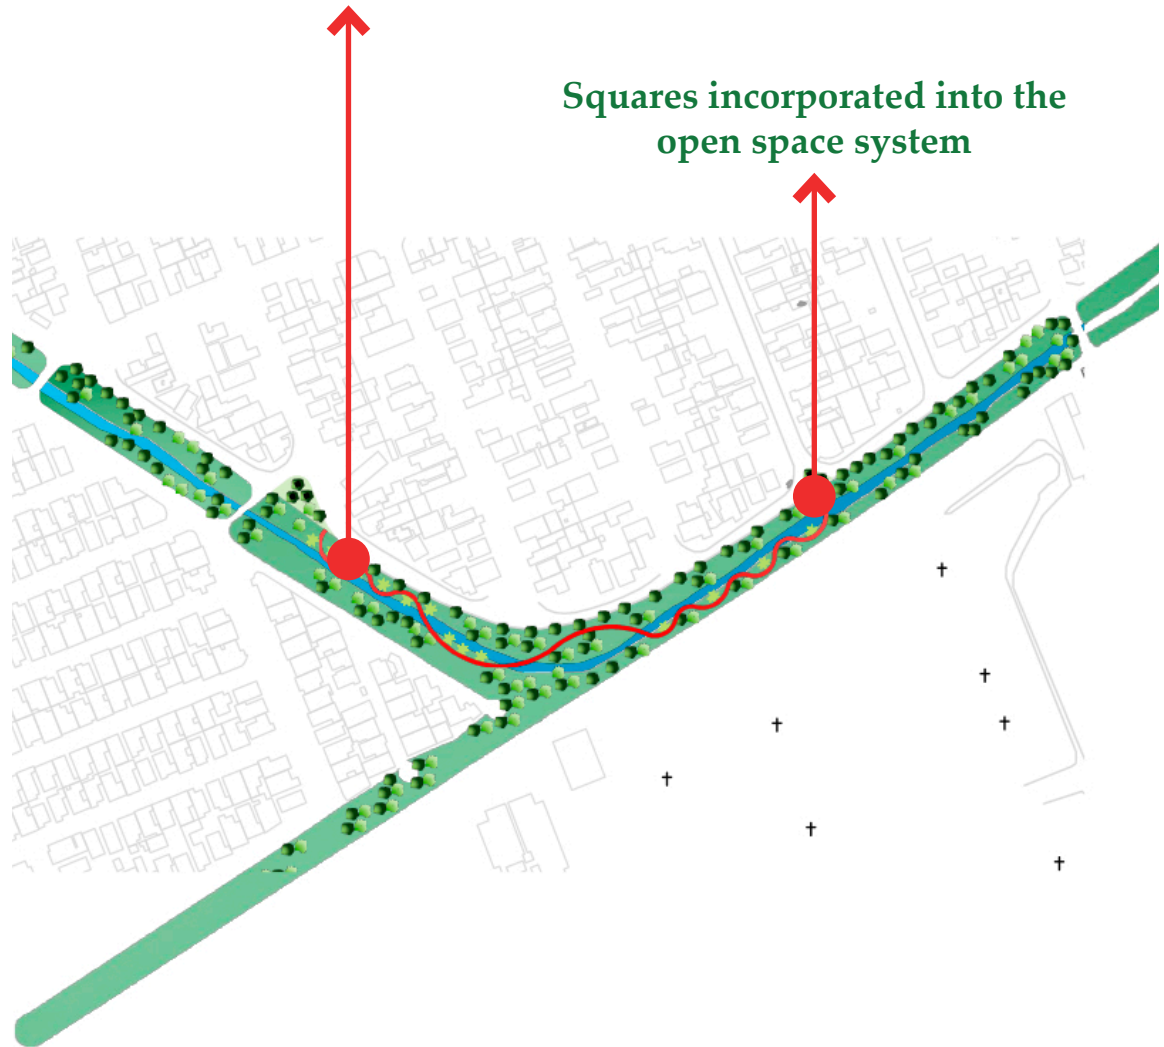



# Wetland

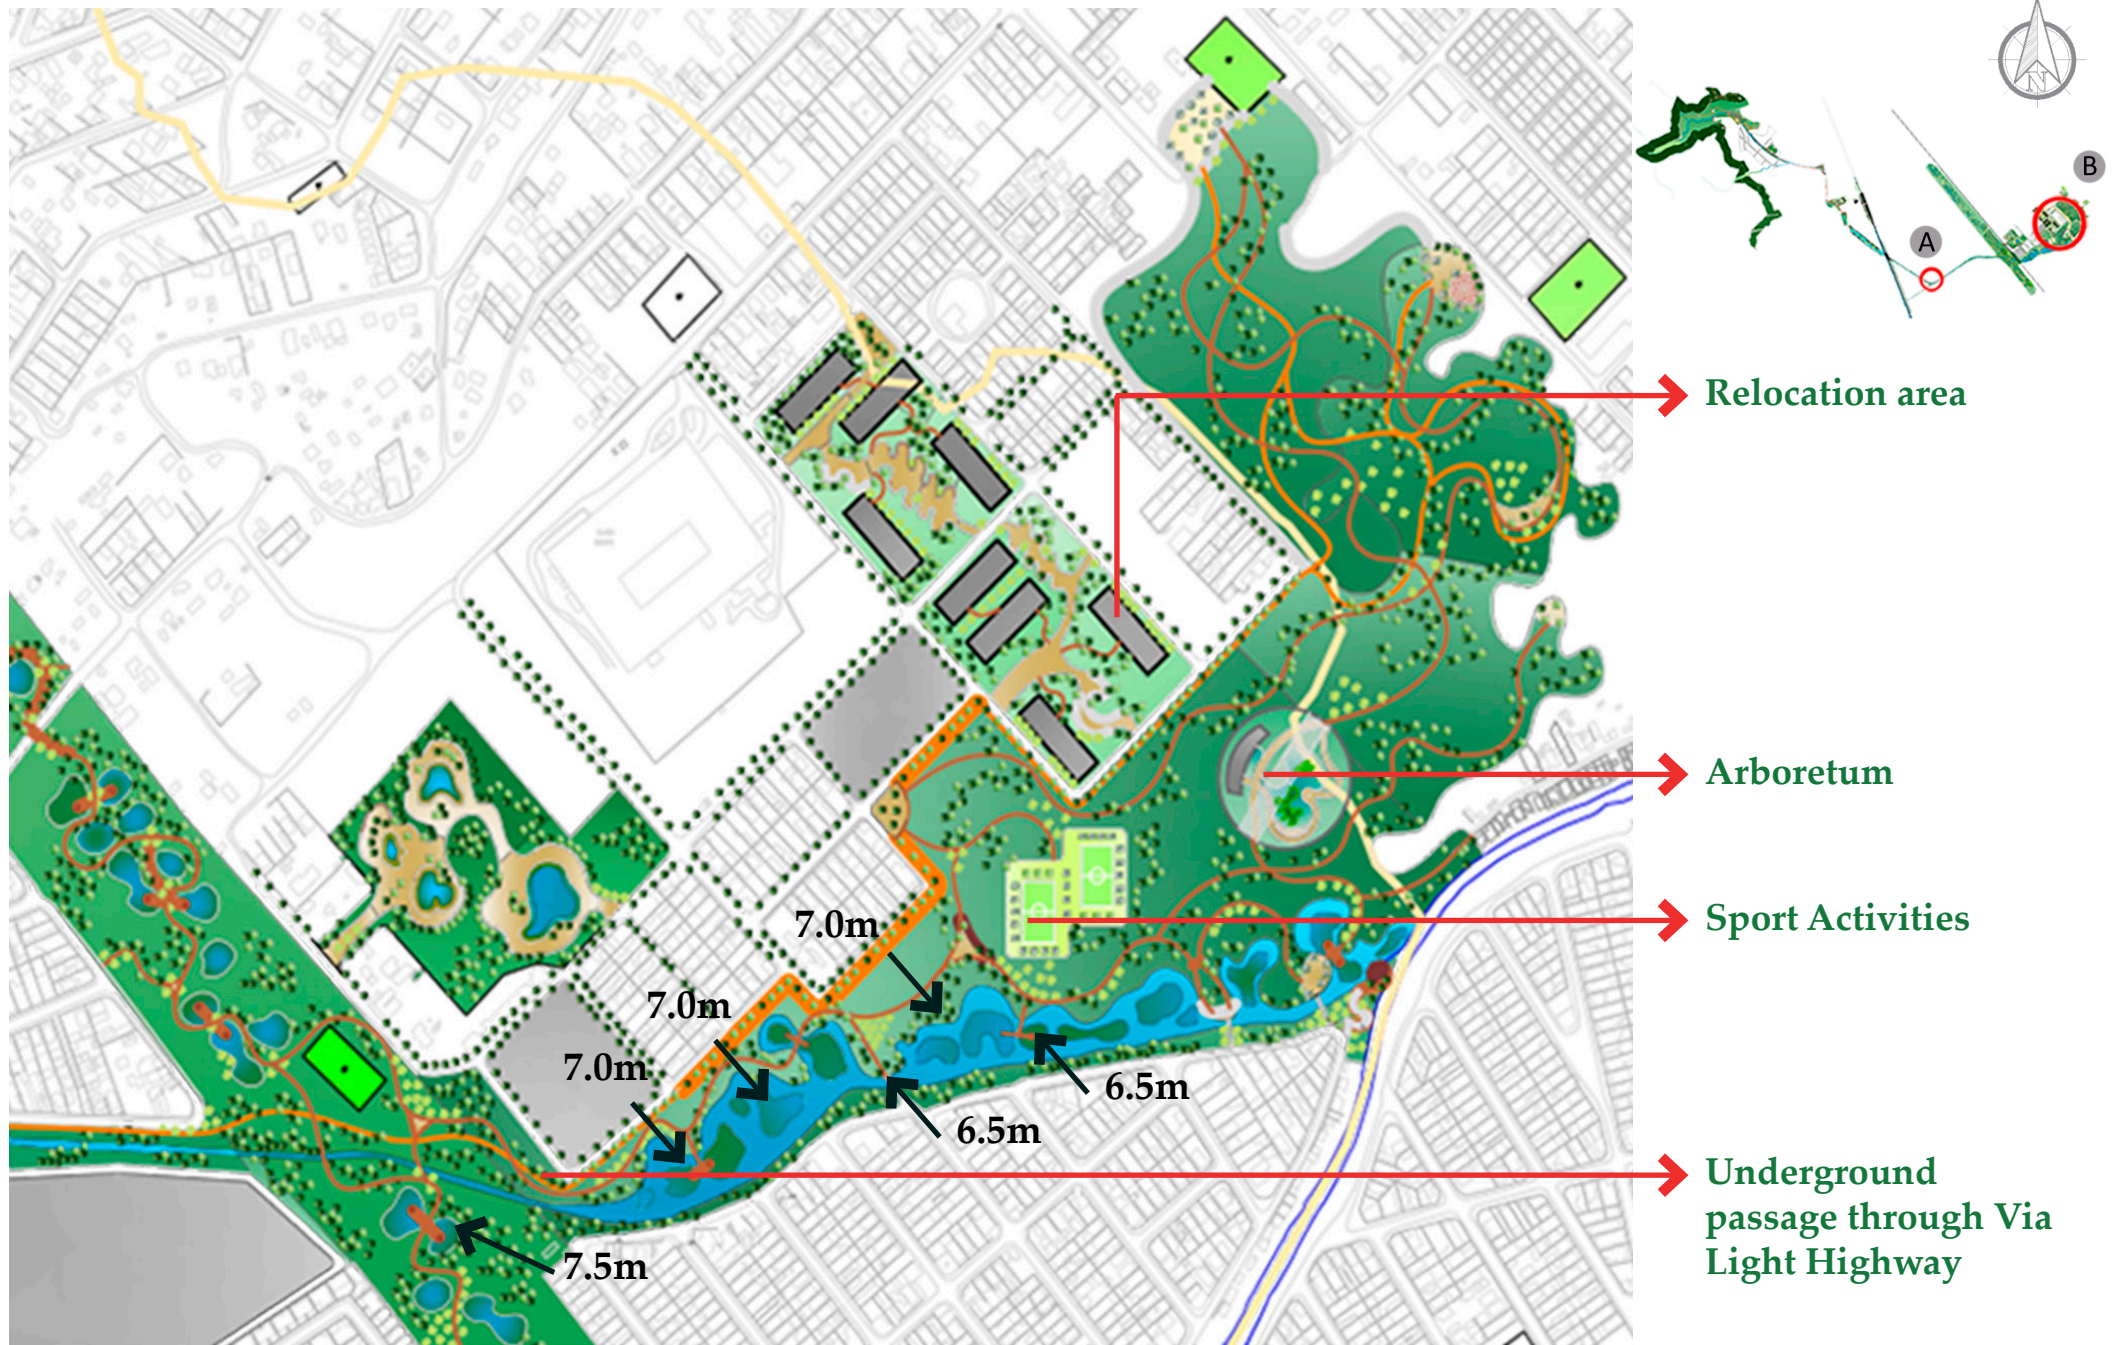



# Mathematical Modelling

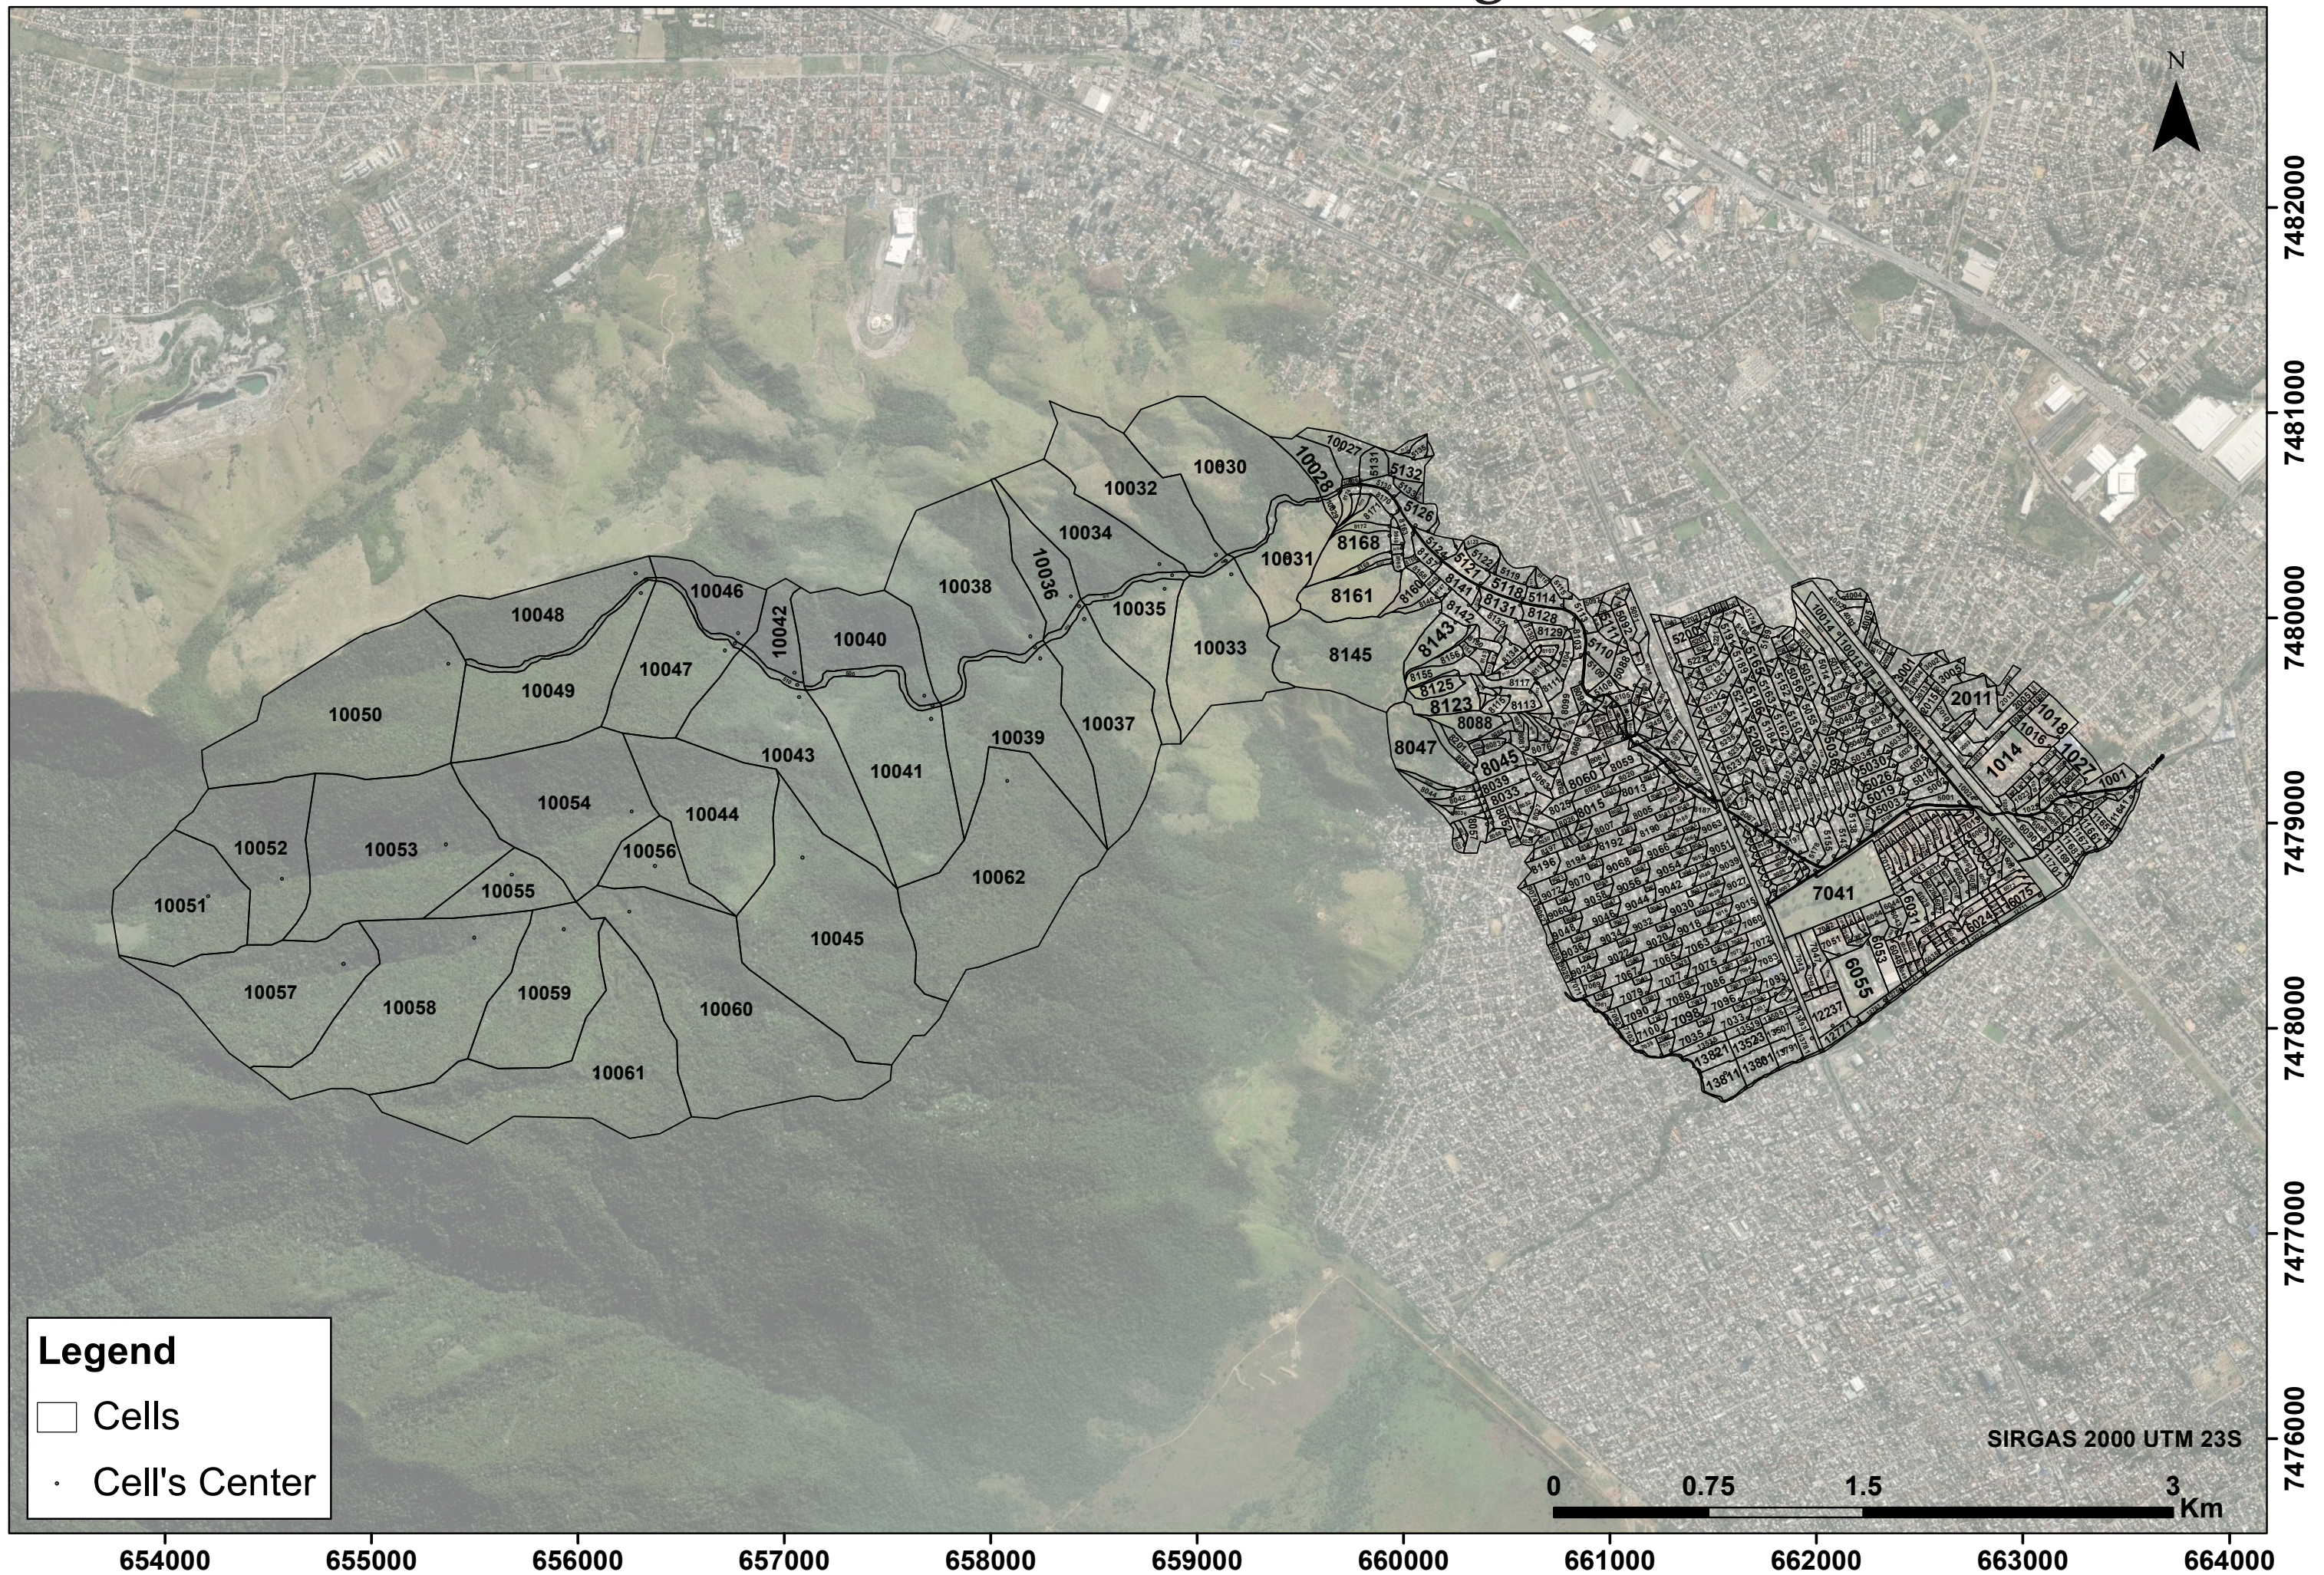



# Mathematical Modelling

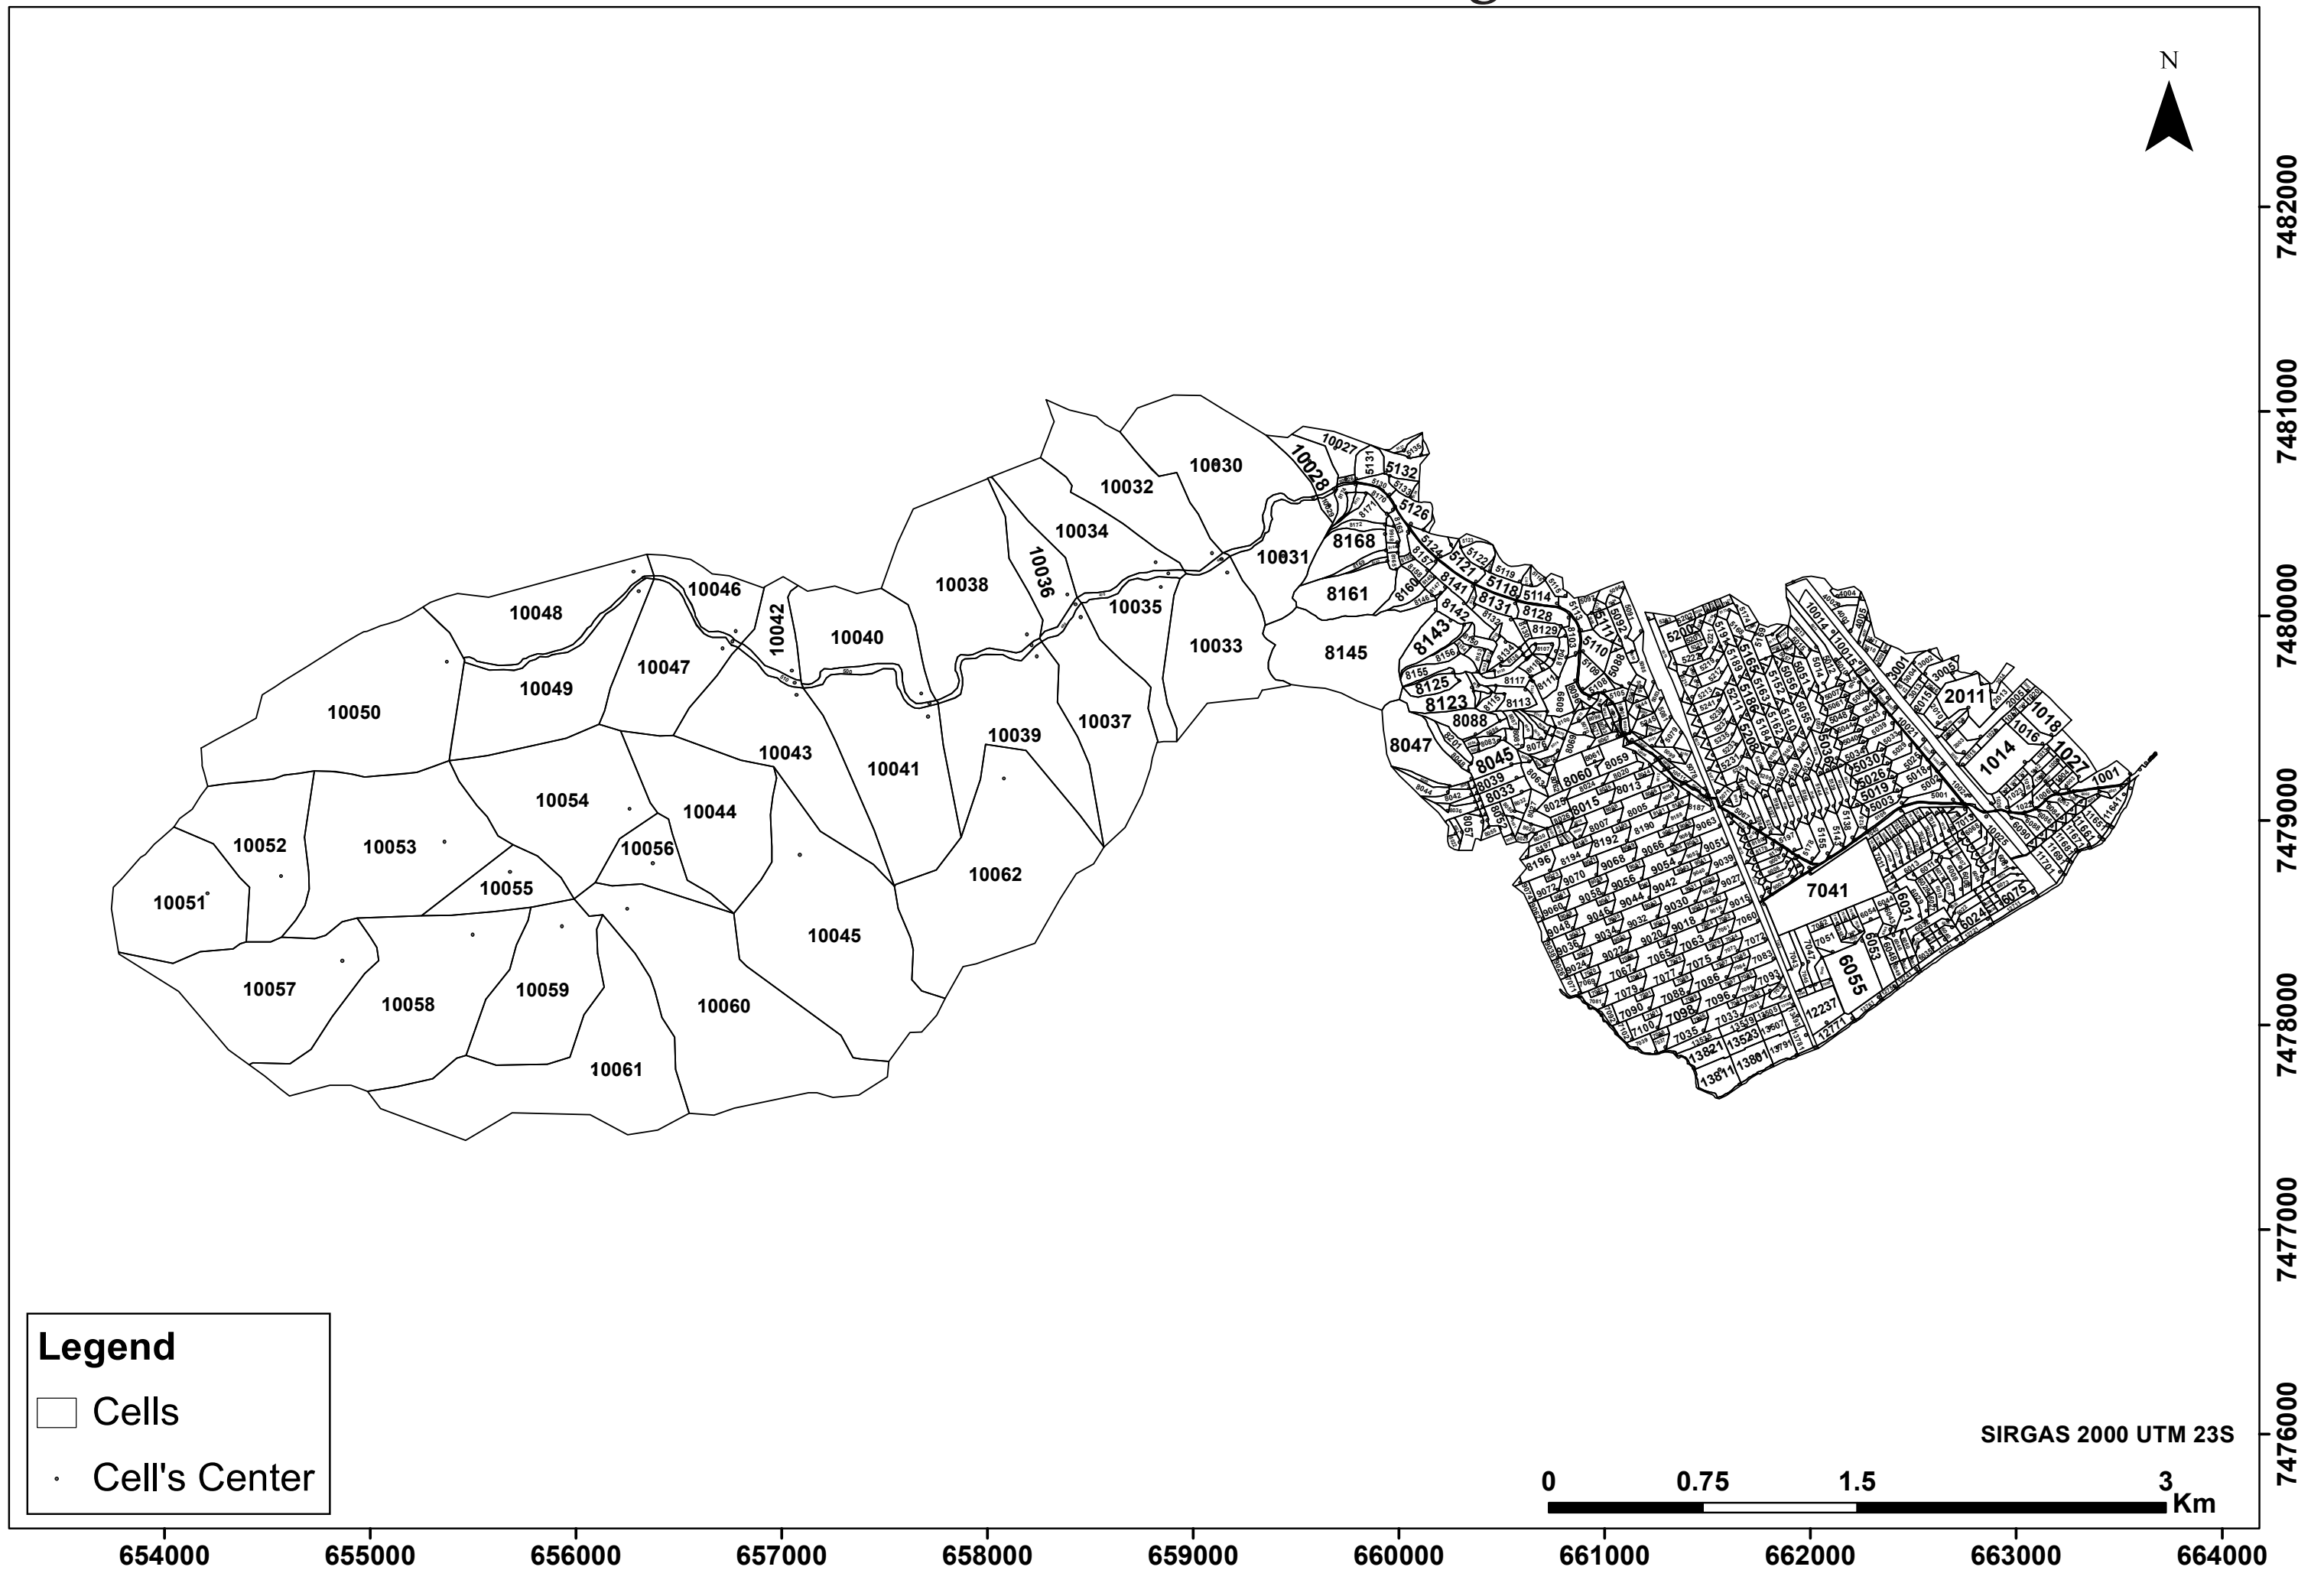

# Multicriteria indexes

## Flood Risk Index

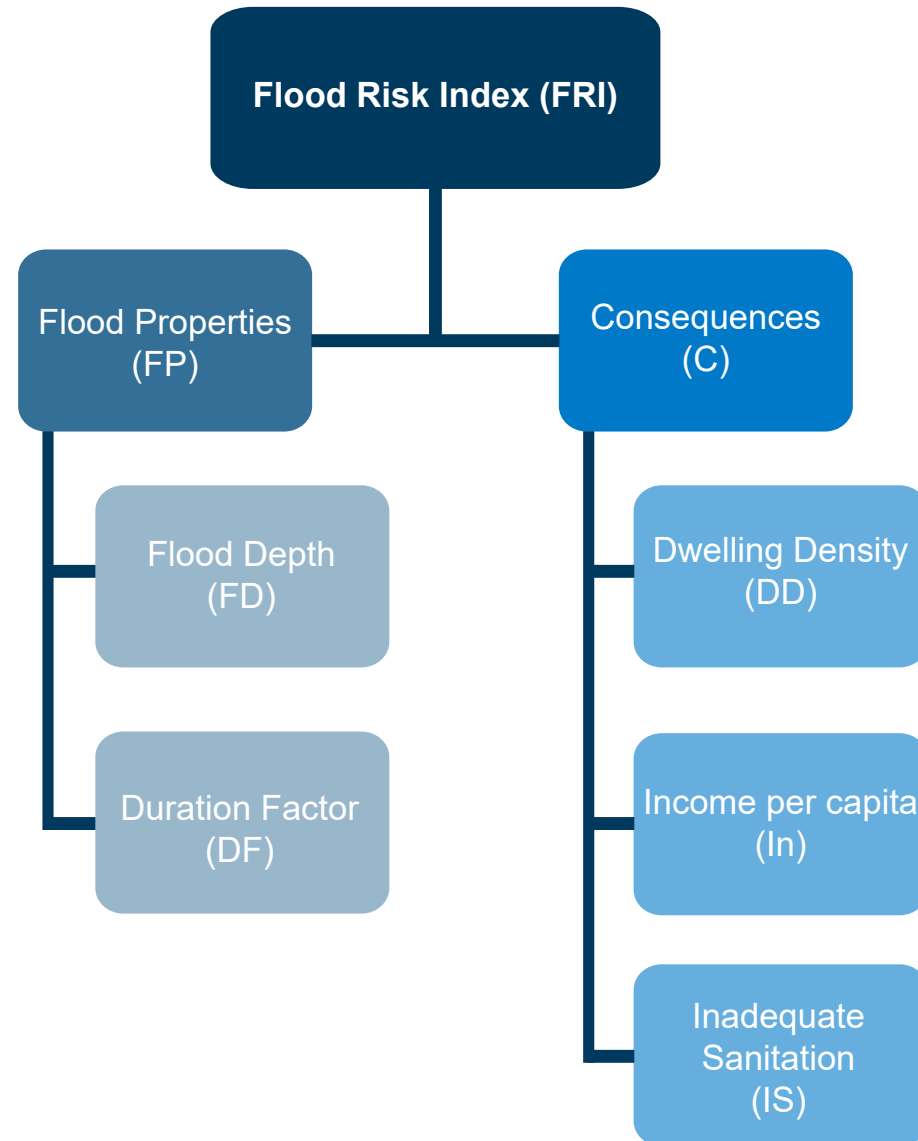



# Multicriteria indexes

## Urban River Restoration Index

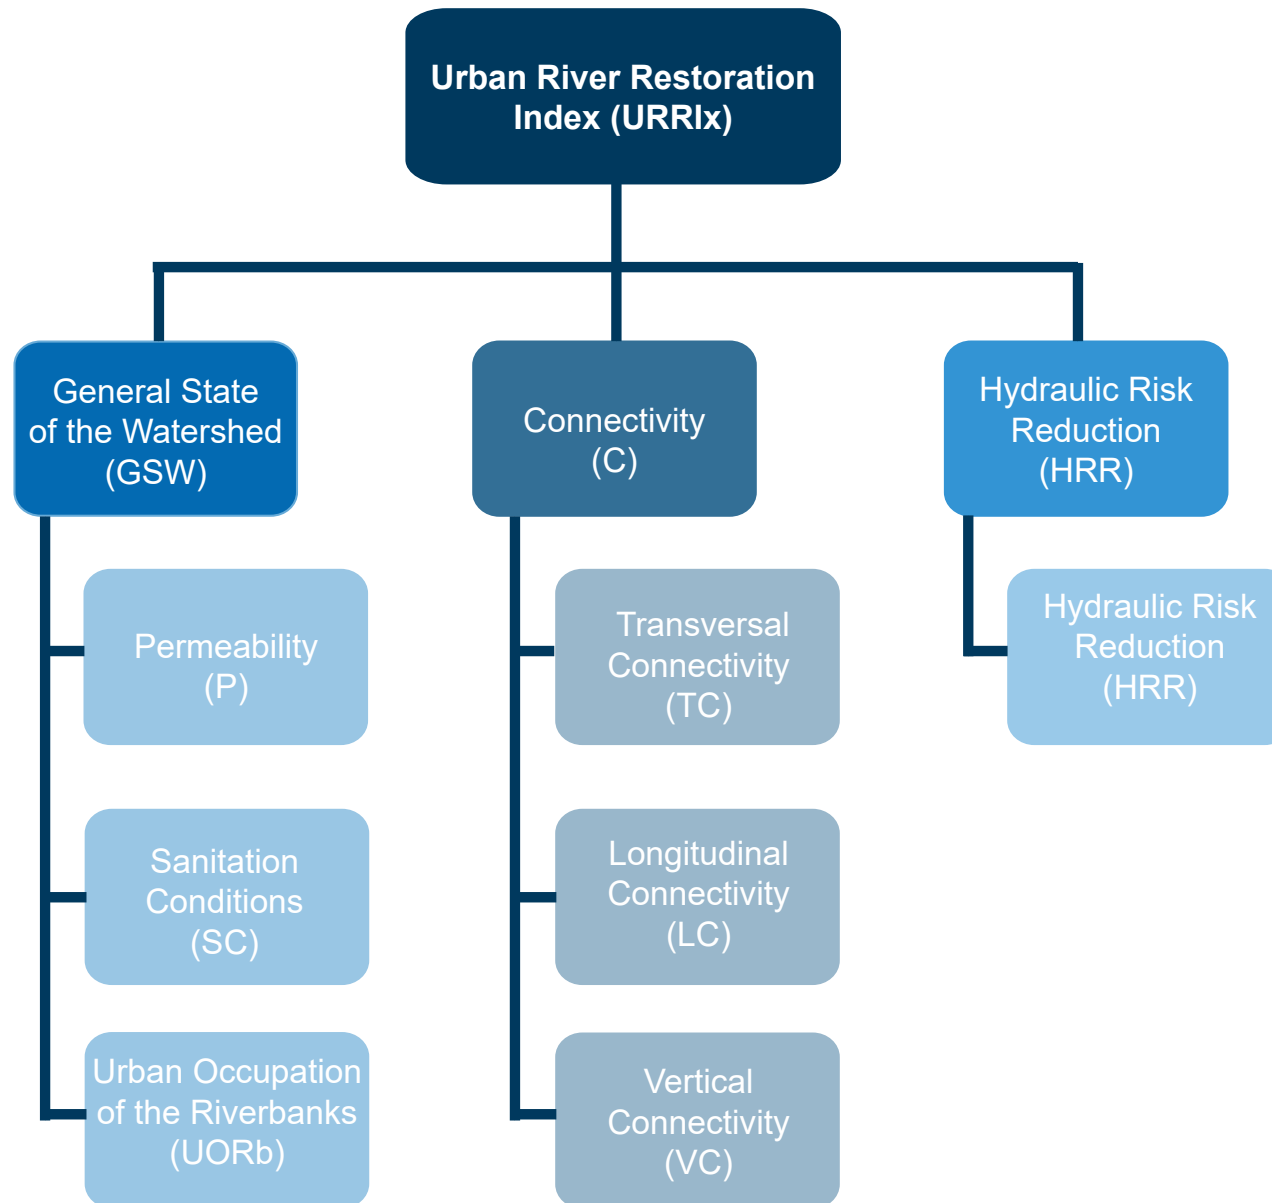



# Multicriteria indexes

## M-FResI

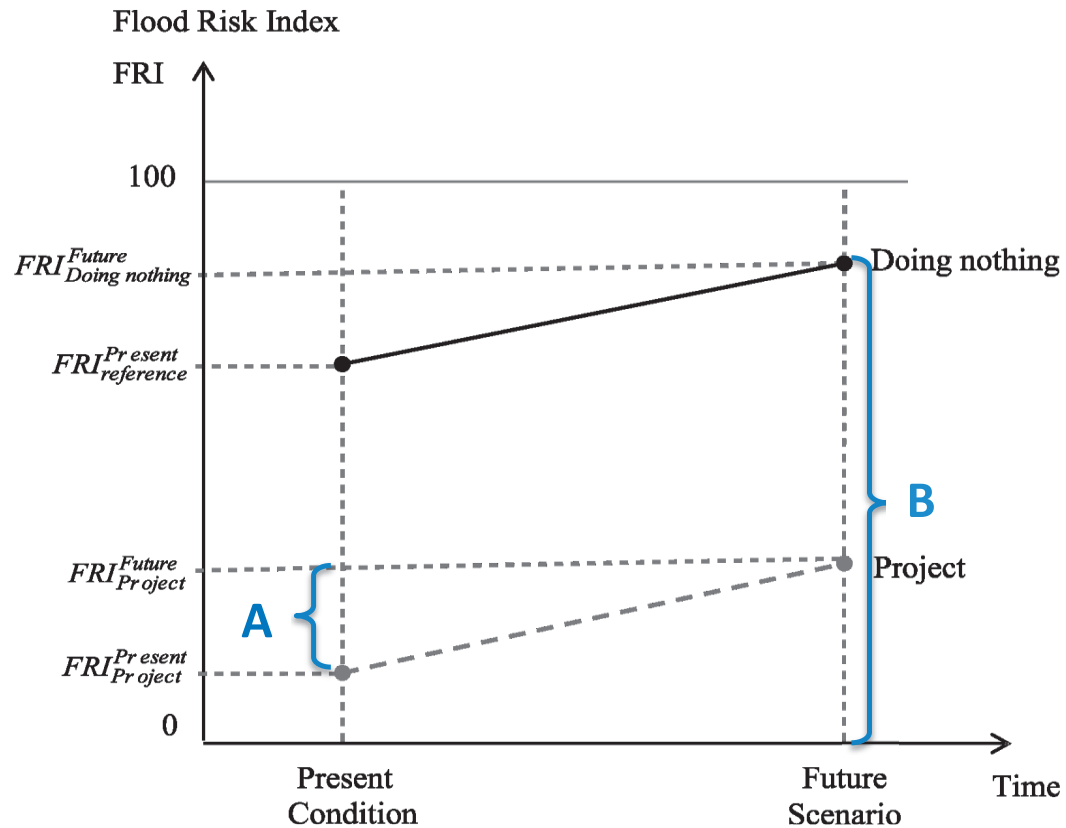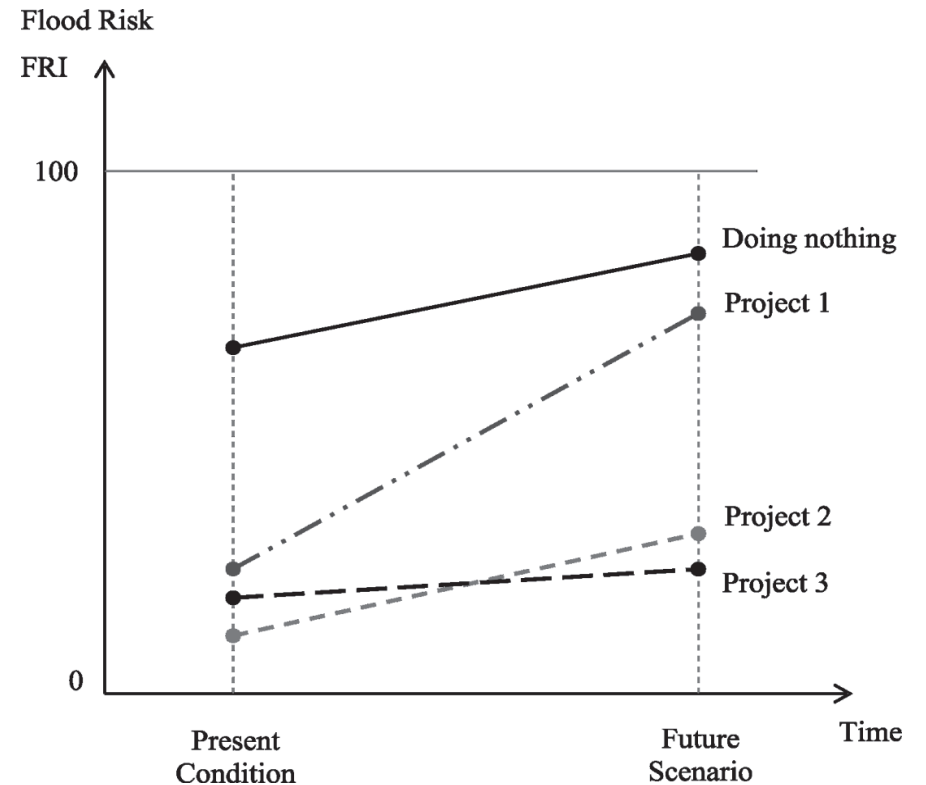

$$mFResI = 1 - \frac{(FRI_{Project}^{Future} - FRI_{Project}^{Present})}{FRI_{Doing nothing}^{Future}}$$

A
B



# Current Situation (CS)

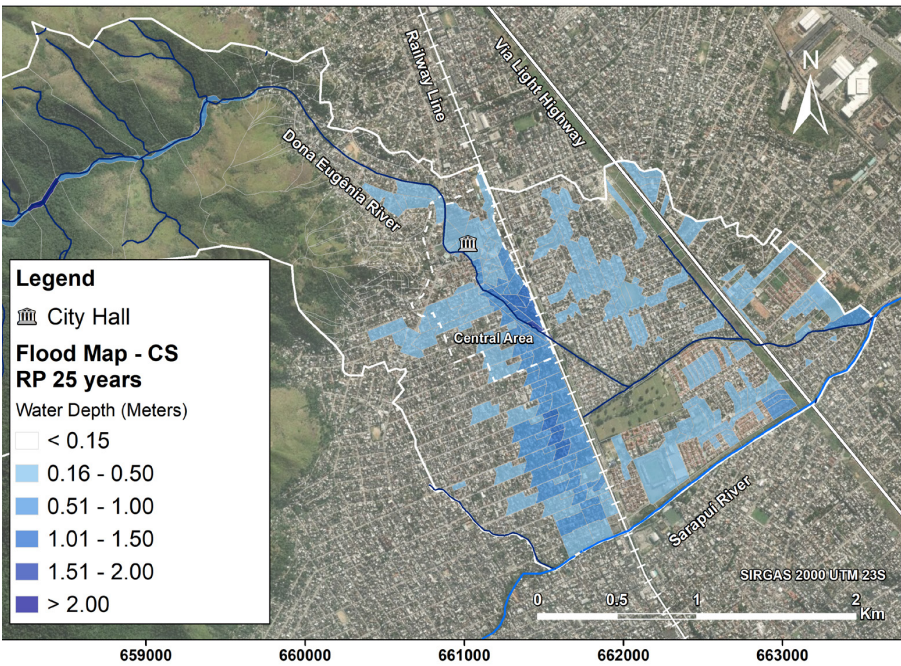

(a) Flood Map

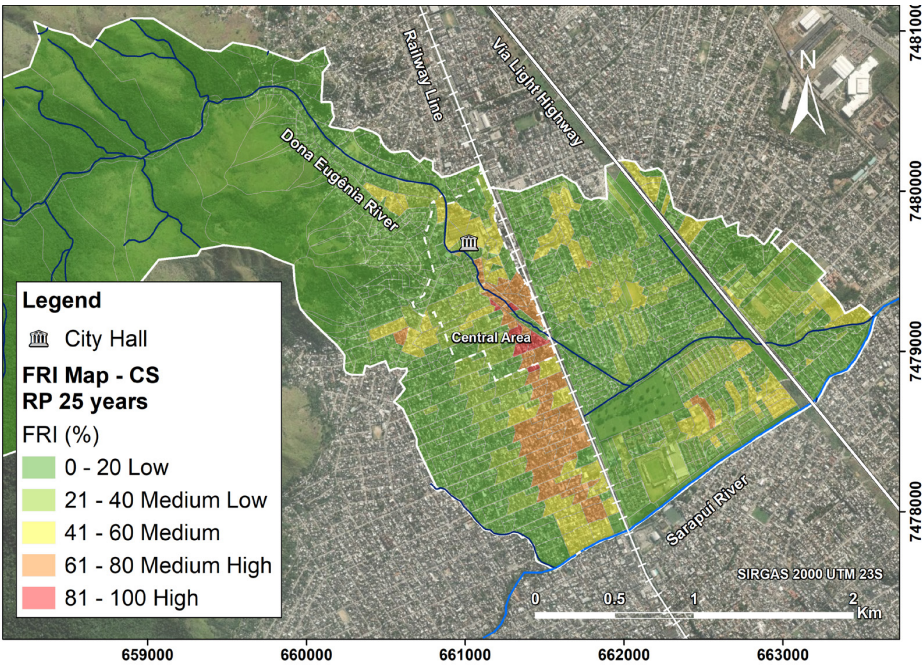

(b) FRI Map

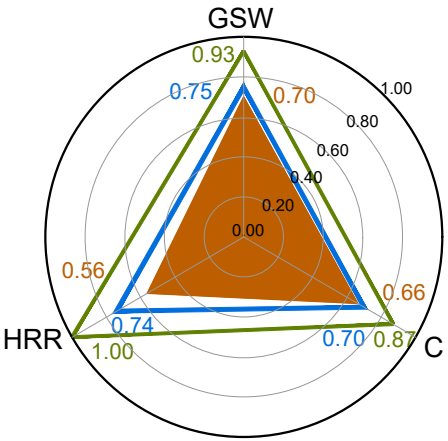

**URRIx:**  
Reach 1: 0,93 | Reach 2: 0,73 | Reach 3: 0,64

(c) URRIx Graph  
Dona Eugênia Watershed

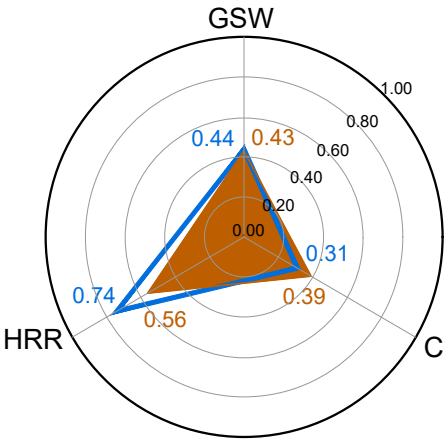

**URRIx:**  
Reach 2: 0,50 | Reach 3: 0,46

(d) URRIx Graph  
Urban Watershed

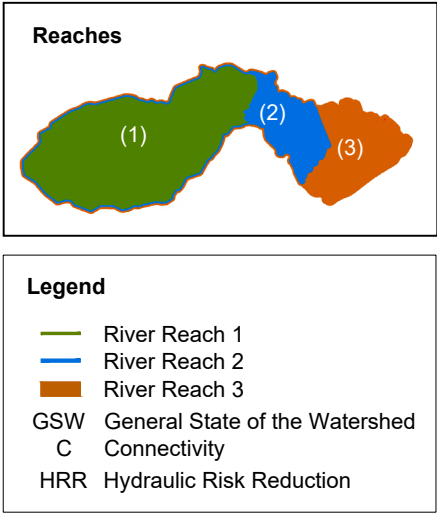



# Usual Drainage Design Alternative (Alt.UDD)

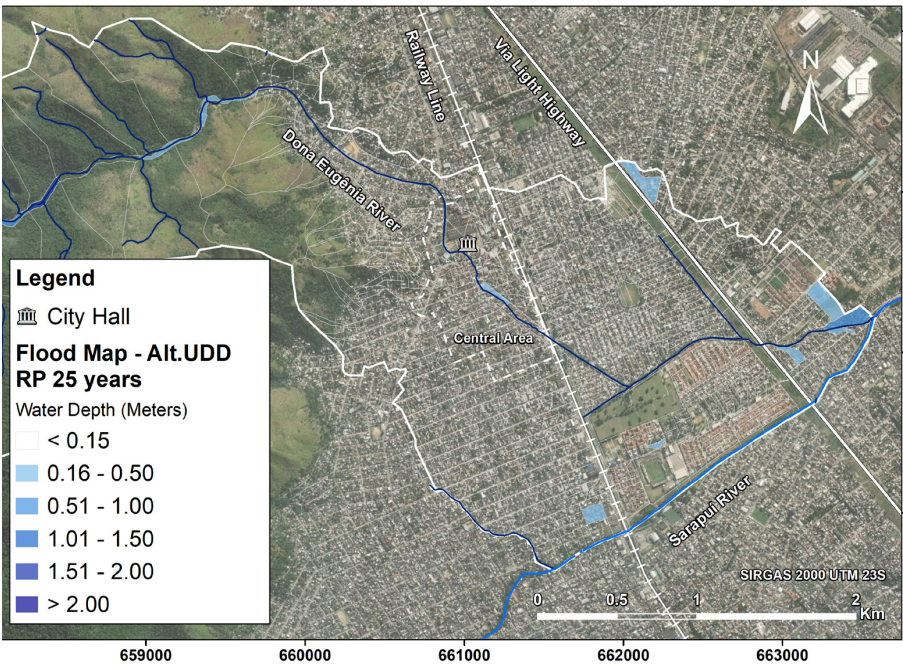

(a) Flood Map

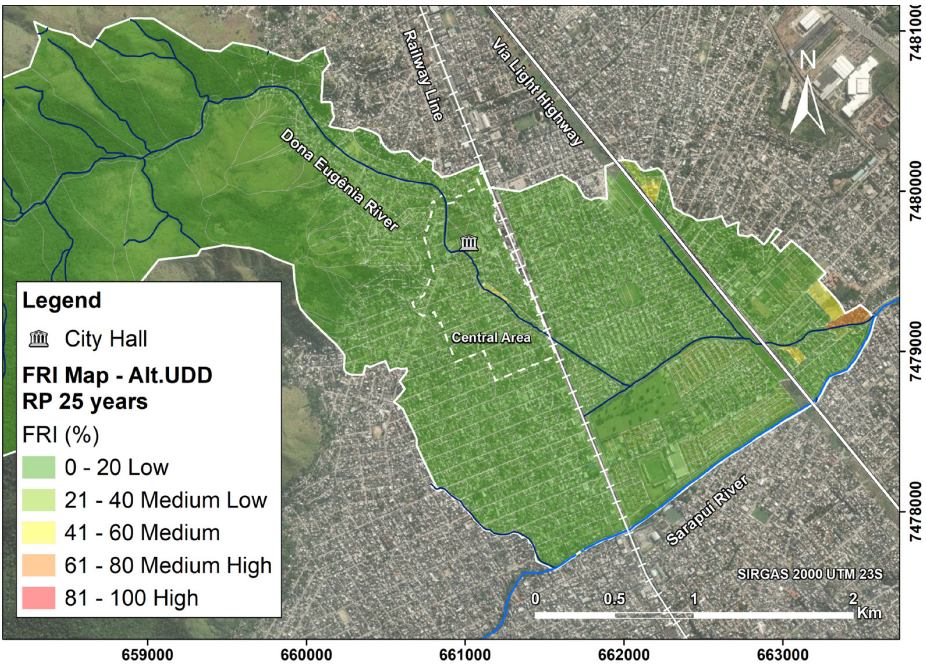

(b) FRI Map

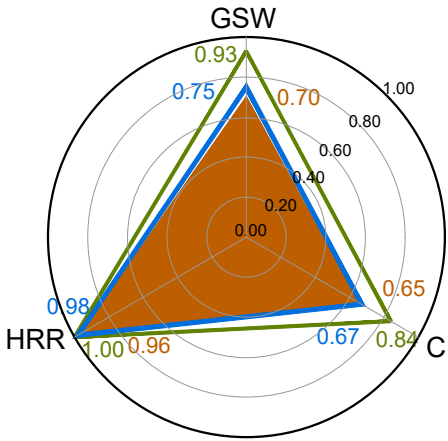

(c) URRIx Graph  
Dona Eugênia Watershed

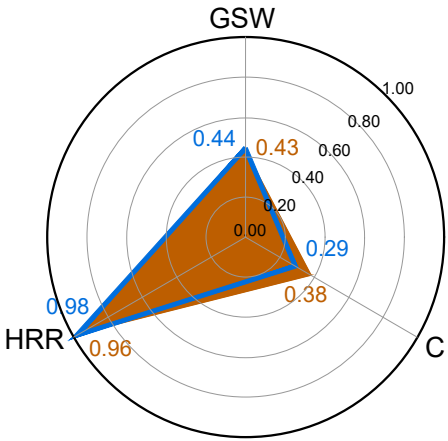

(d) URRIx Graph  
Urban Watershed

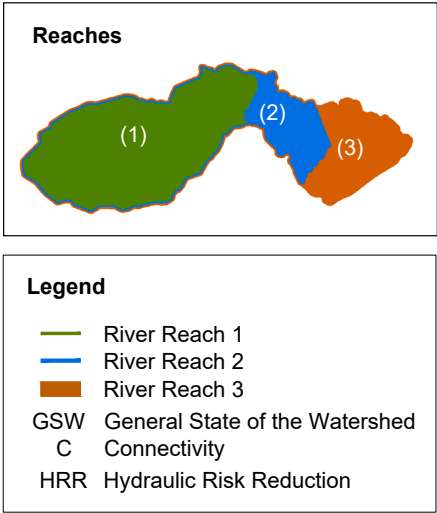



# River Restoration+Sustainable Urban Drainage Alternative (Alt.RR+SUDS)

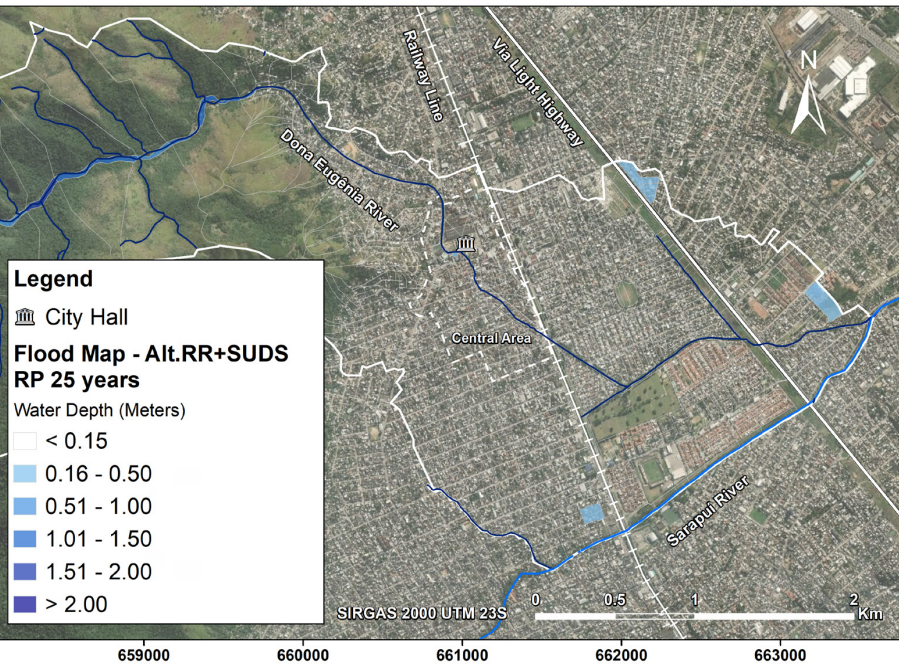

(a) Flood Map

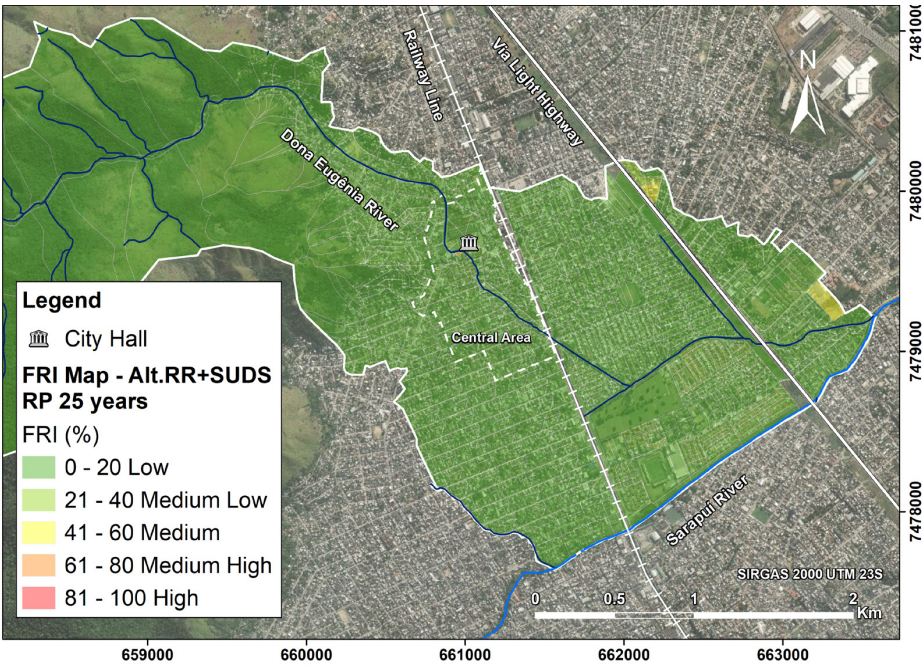

(b) FRI Map

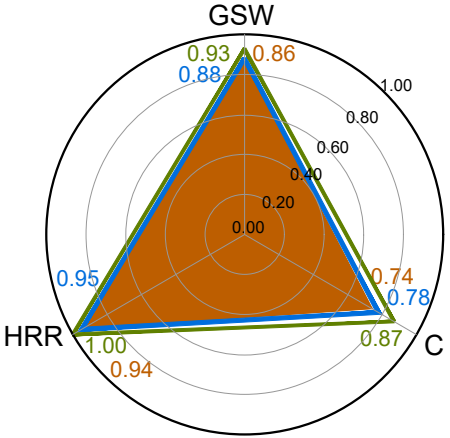

**URRIx:**  
Reach 1: 0,93 | Reach 2: 0,87 | Reach 3: 0,85

(c) URRIx Graph  
Dona Eugênia Watershed

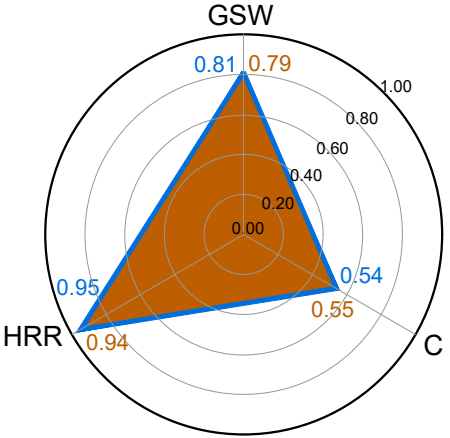

**URRIx:**  
Reach 2: 0,77 | Reach 3: 0,76

(d) URRIx Graph  
Urban Watershed





# Current Situation evolving to Urban Saturation (FRA\_US)

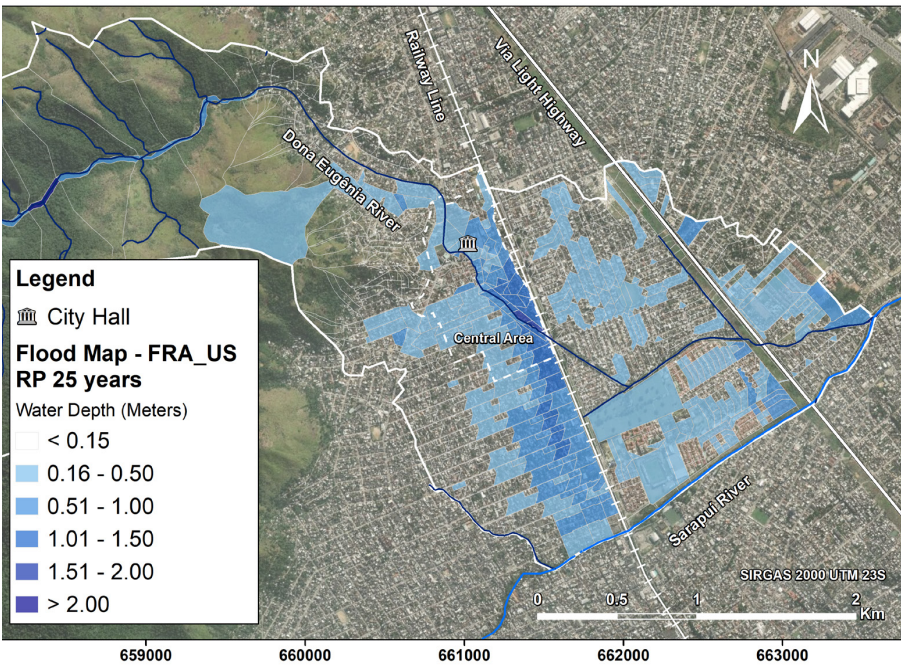

(a) Flood Map

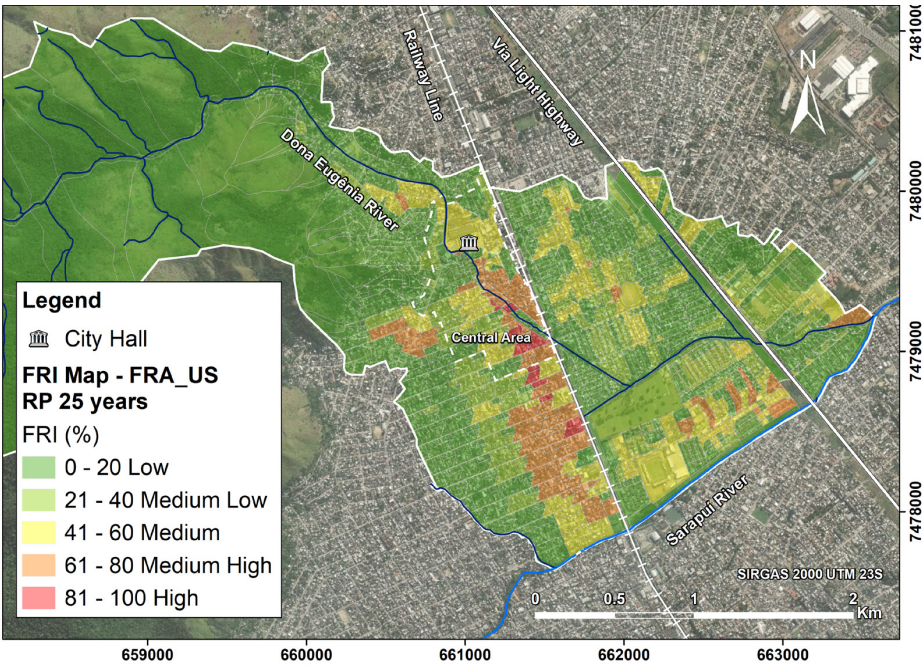

(b) FRI Map

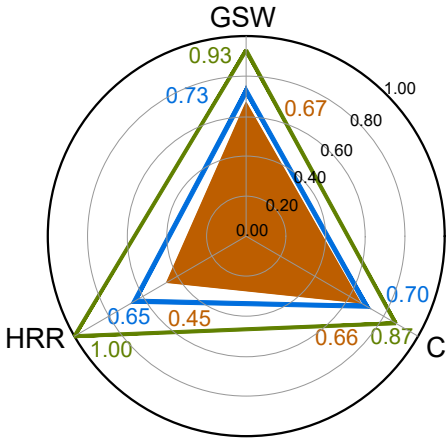

(c) URRIx Graph  
Dona Eugênia Watershed

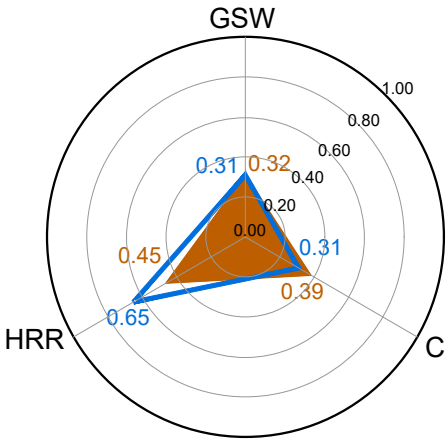

(d) URRIx Graph  
Urban Watershed

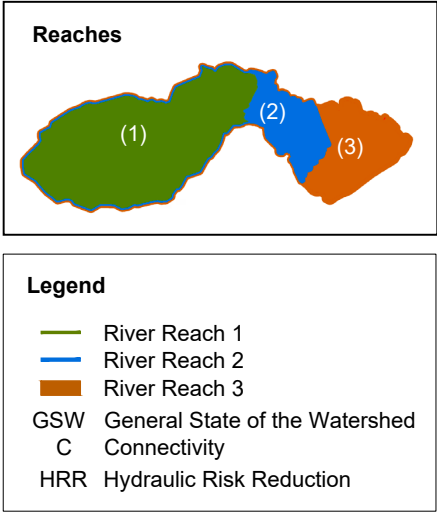



# Usual Drainage Design Alternative under Urban Saturation (FRA\_Alt.UDD<sub>US</sub>)

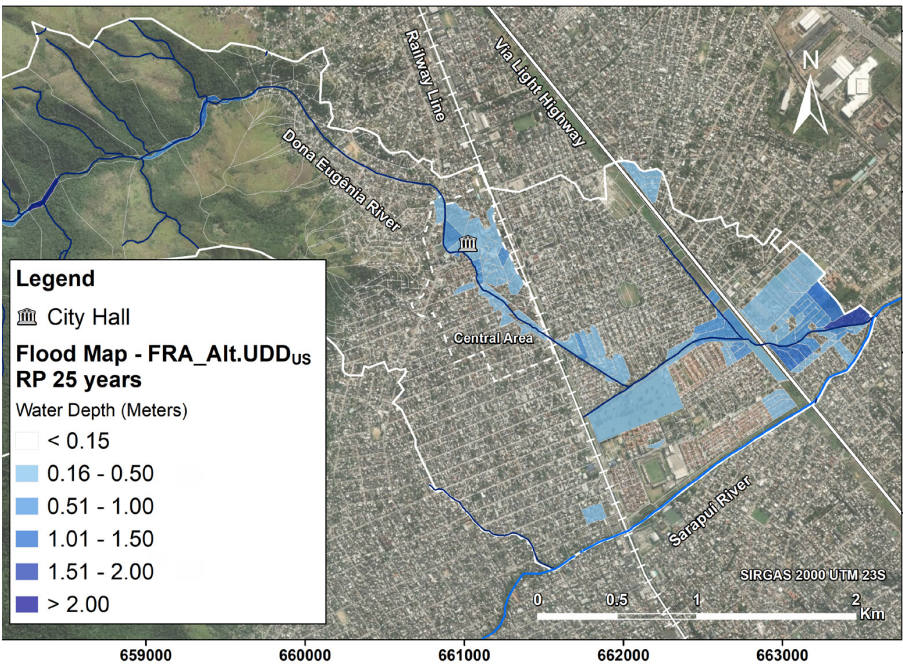

(a) Flood Map

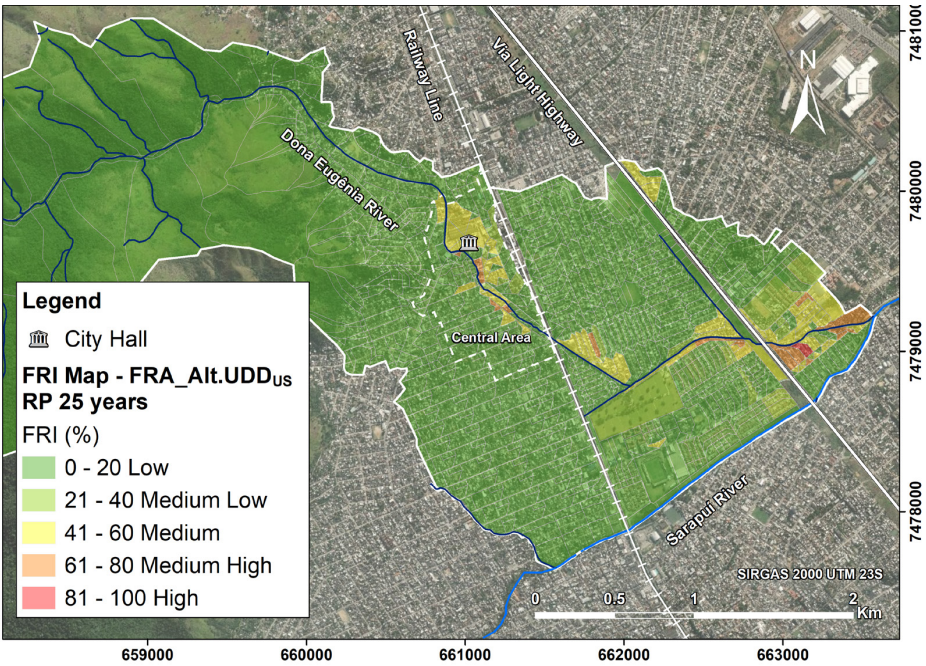

(b) FRI Map

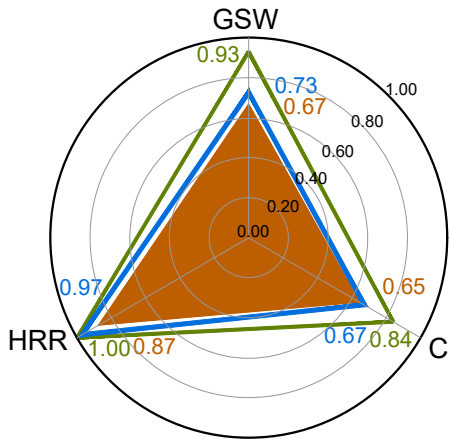

URRIx:  
Reach 1: 0,92 | Reach 2: 0,79 | Reach 3: 0,73

(c) URRIx Graph  
Dona Eugênia Watershed

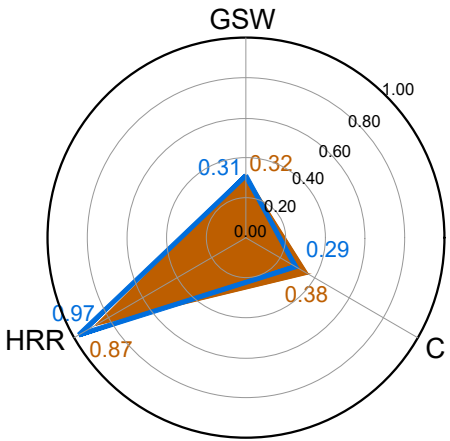

URRIx:  
Reach 2: 0,52 | Reach 3: 0,52

(d) URRIx Graph  
Urban Watershed





# River Restoration+Sustainable Urban Drainage Alternative under Urban Saturation (FRA\_Alt.RR+SUDS<sub>US</sub>)

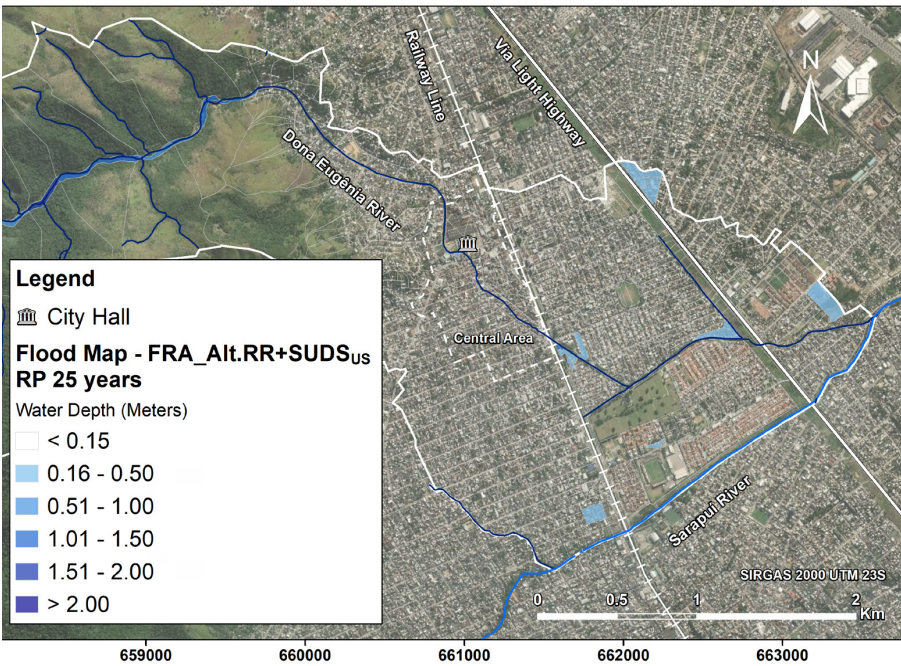

(a) Flood Map

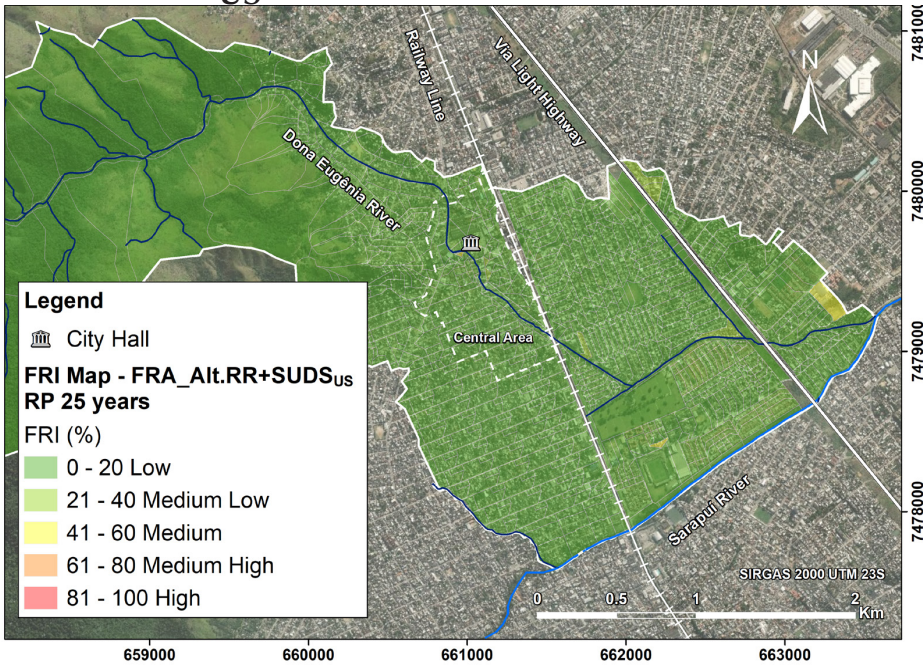

(b) FRI Map

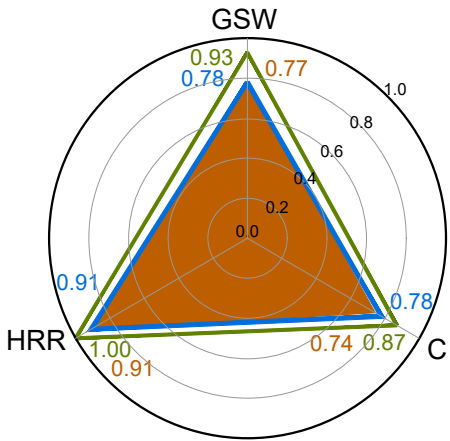

URRIx:  
Reach 1: 0,93 | Reach 2: 0,82 | Reach 3: 0,81

(c) URRIx Graph  
Dona Eugênia Watershed

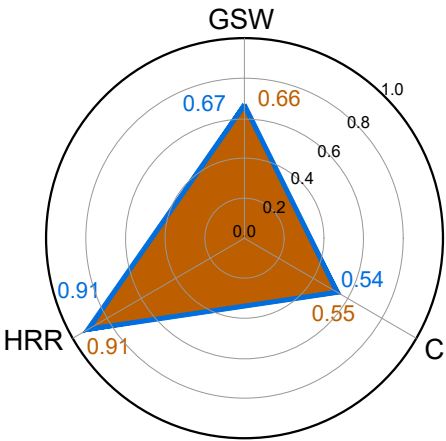

URRIx:  
Reach 2: 0,71 | Reach 3: 0,71

(d) URRIx Graph  
Urban Watershed



Legend  
— River Reach 1  
— River Reach 2  
— River Reach 3  
GSW General State of the Watershed  
C Connectivity  
HRR Hydraulic Risk Reduction



# Water

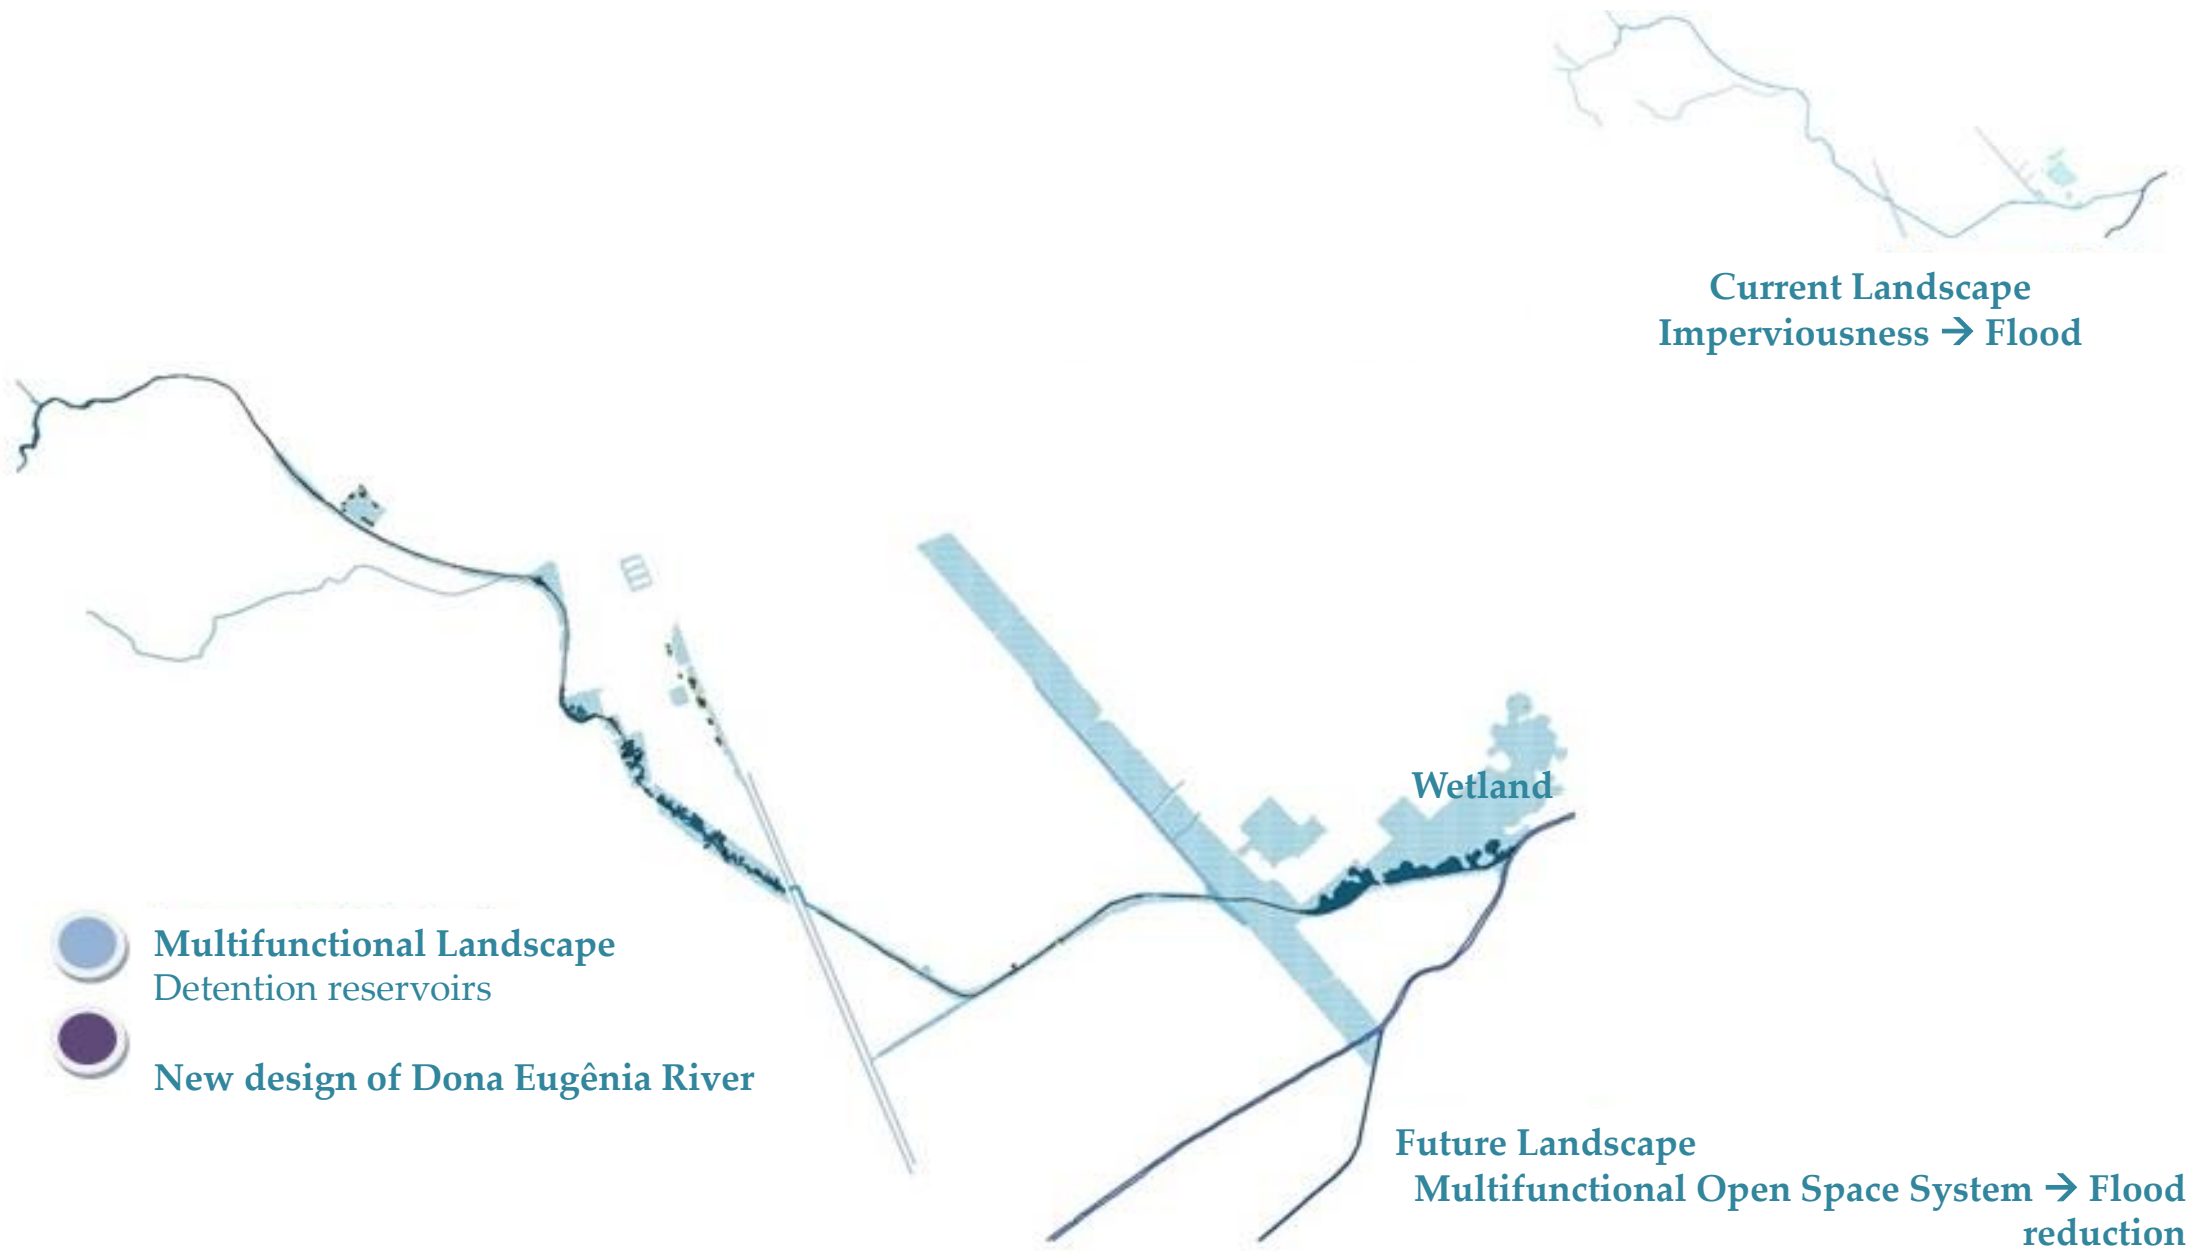



# Vegetation

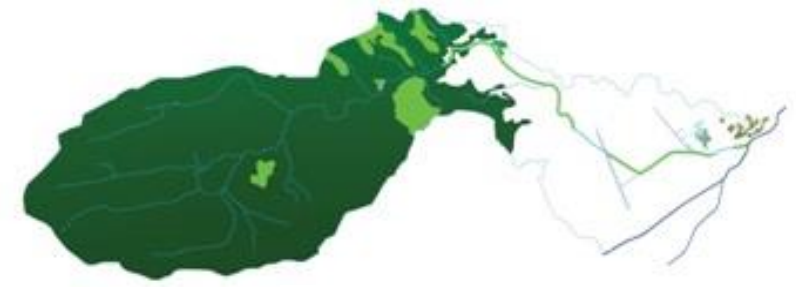

**Current Landscape**  
Degraded urban vegetation

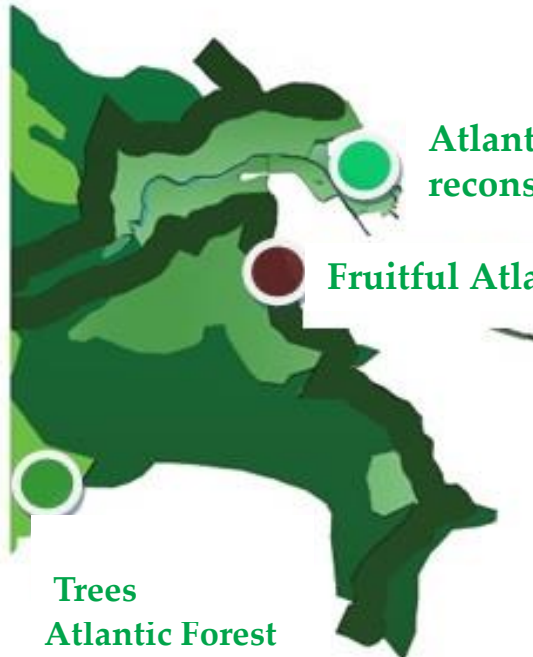

**Trees**  
**Atlantic Forest**  
**Environmental Protection Area**

**Atlantic Forest**  
**reconstitution**

**Fruitful Atlantic Forest vegetation**

**Urban**  
**vegetation**

**Wetland**  
**vegetation**

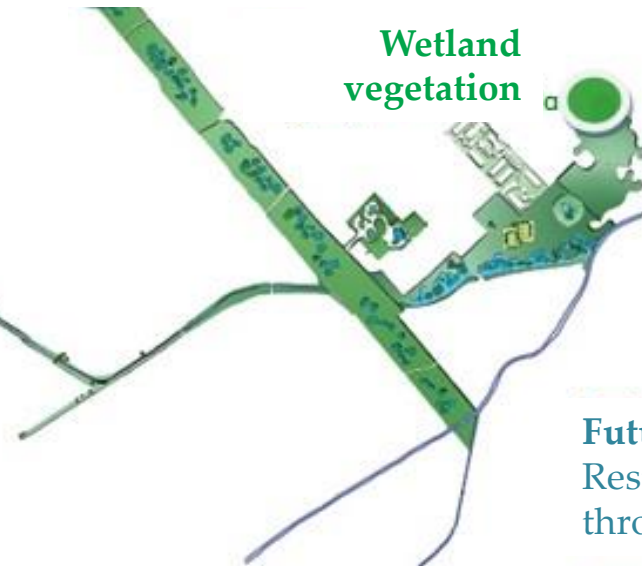

**Future Landscape**  
Restoration of the degraded vegetation  
through green corridors and parks



# Infrastructure - Services

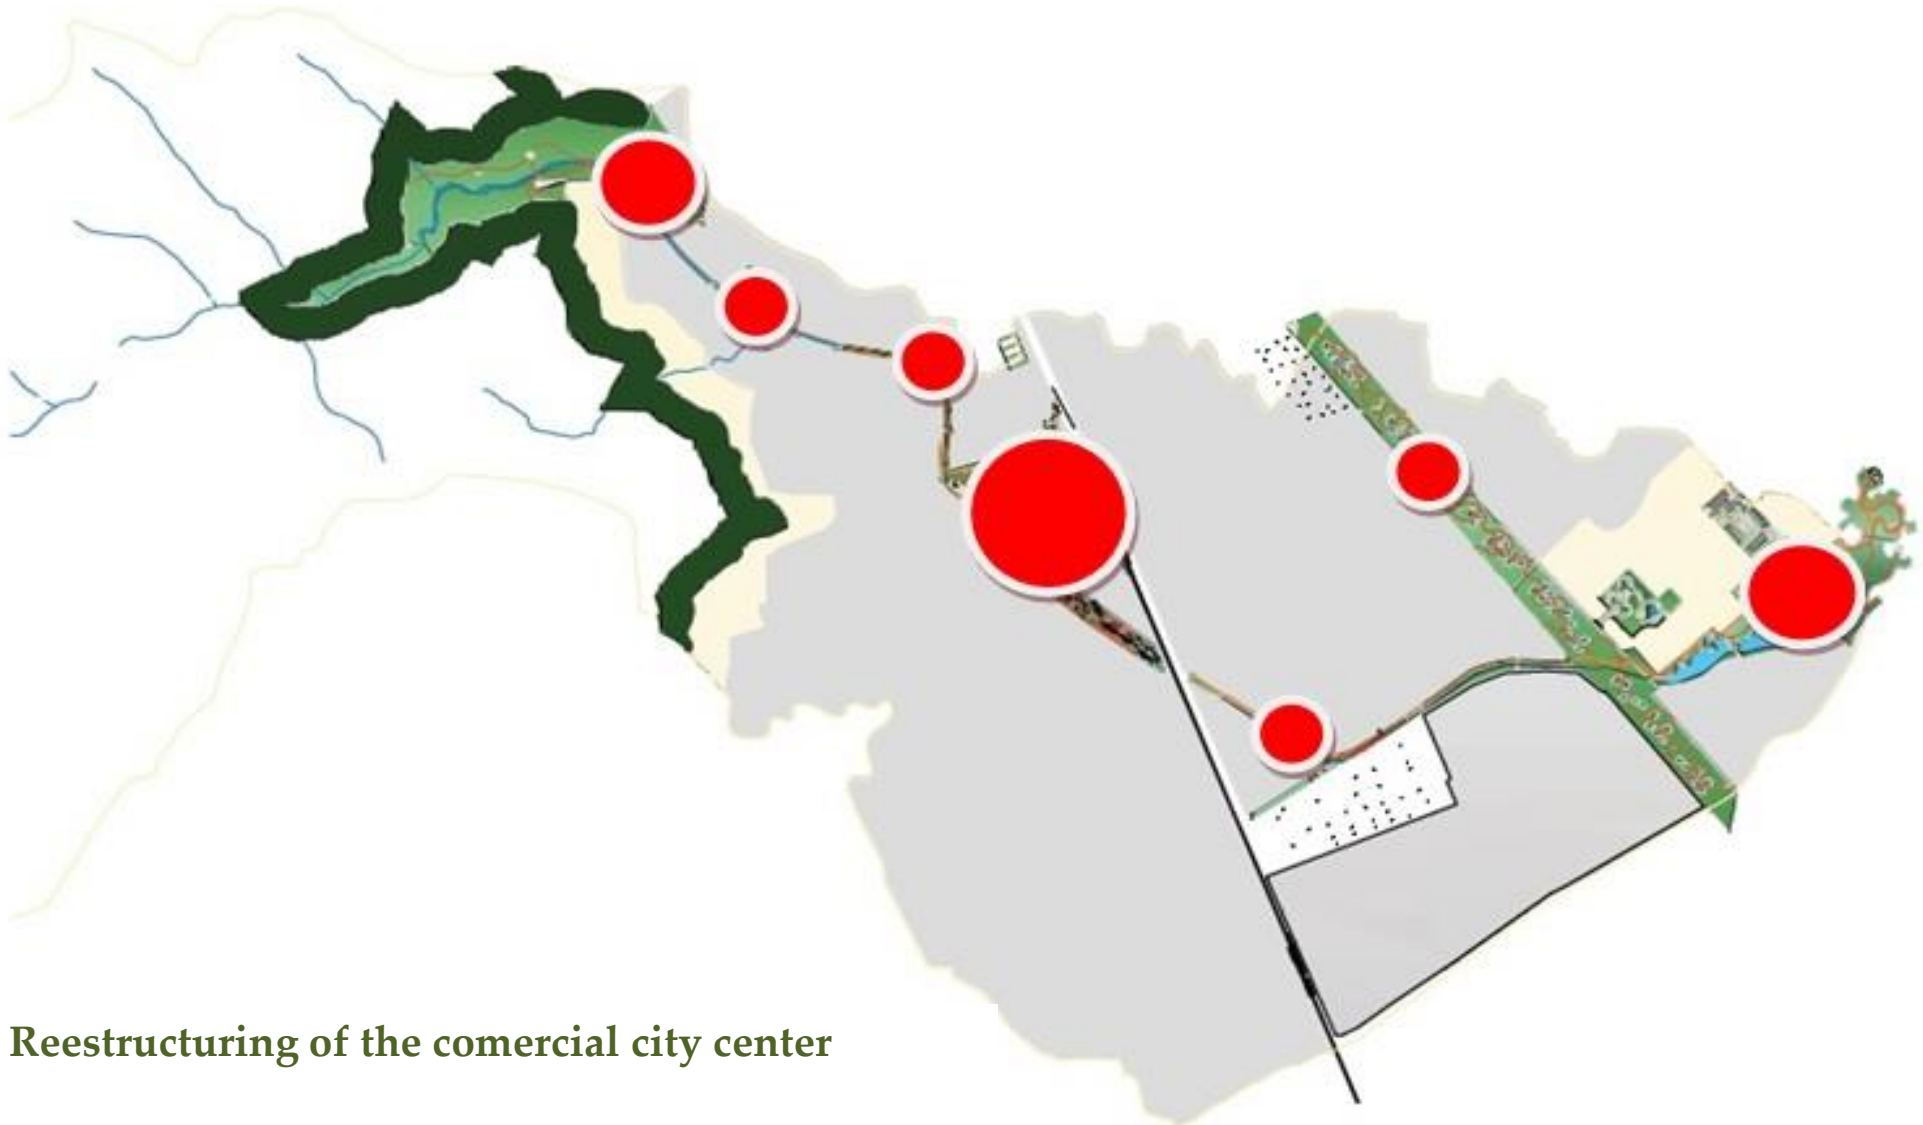

- Reestructuring of the comercial city center
- New business opportunities arising from revitalized city areas



# Infrastructure - Housing

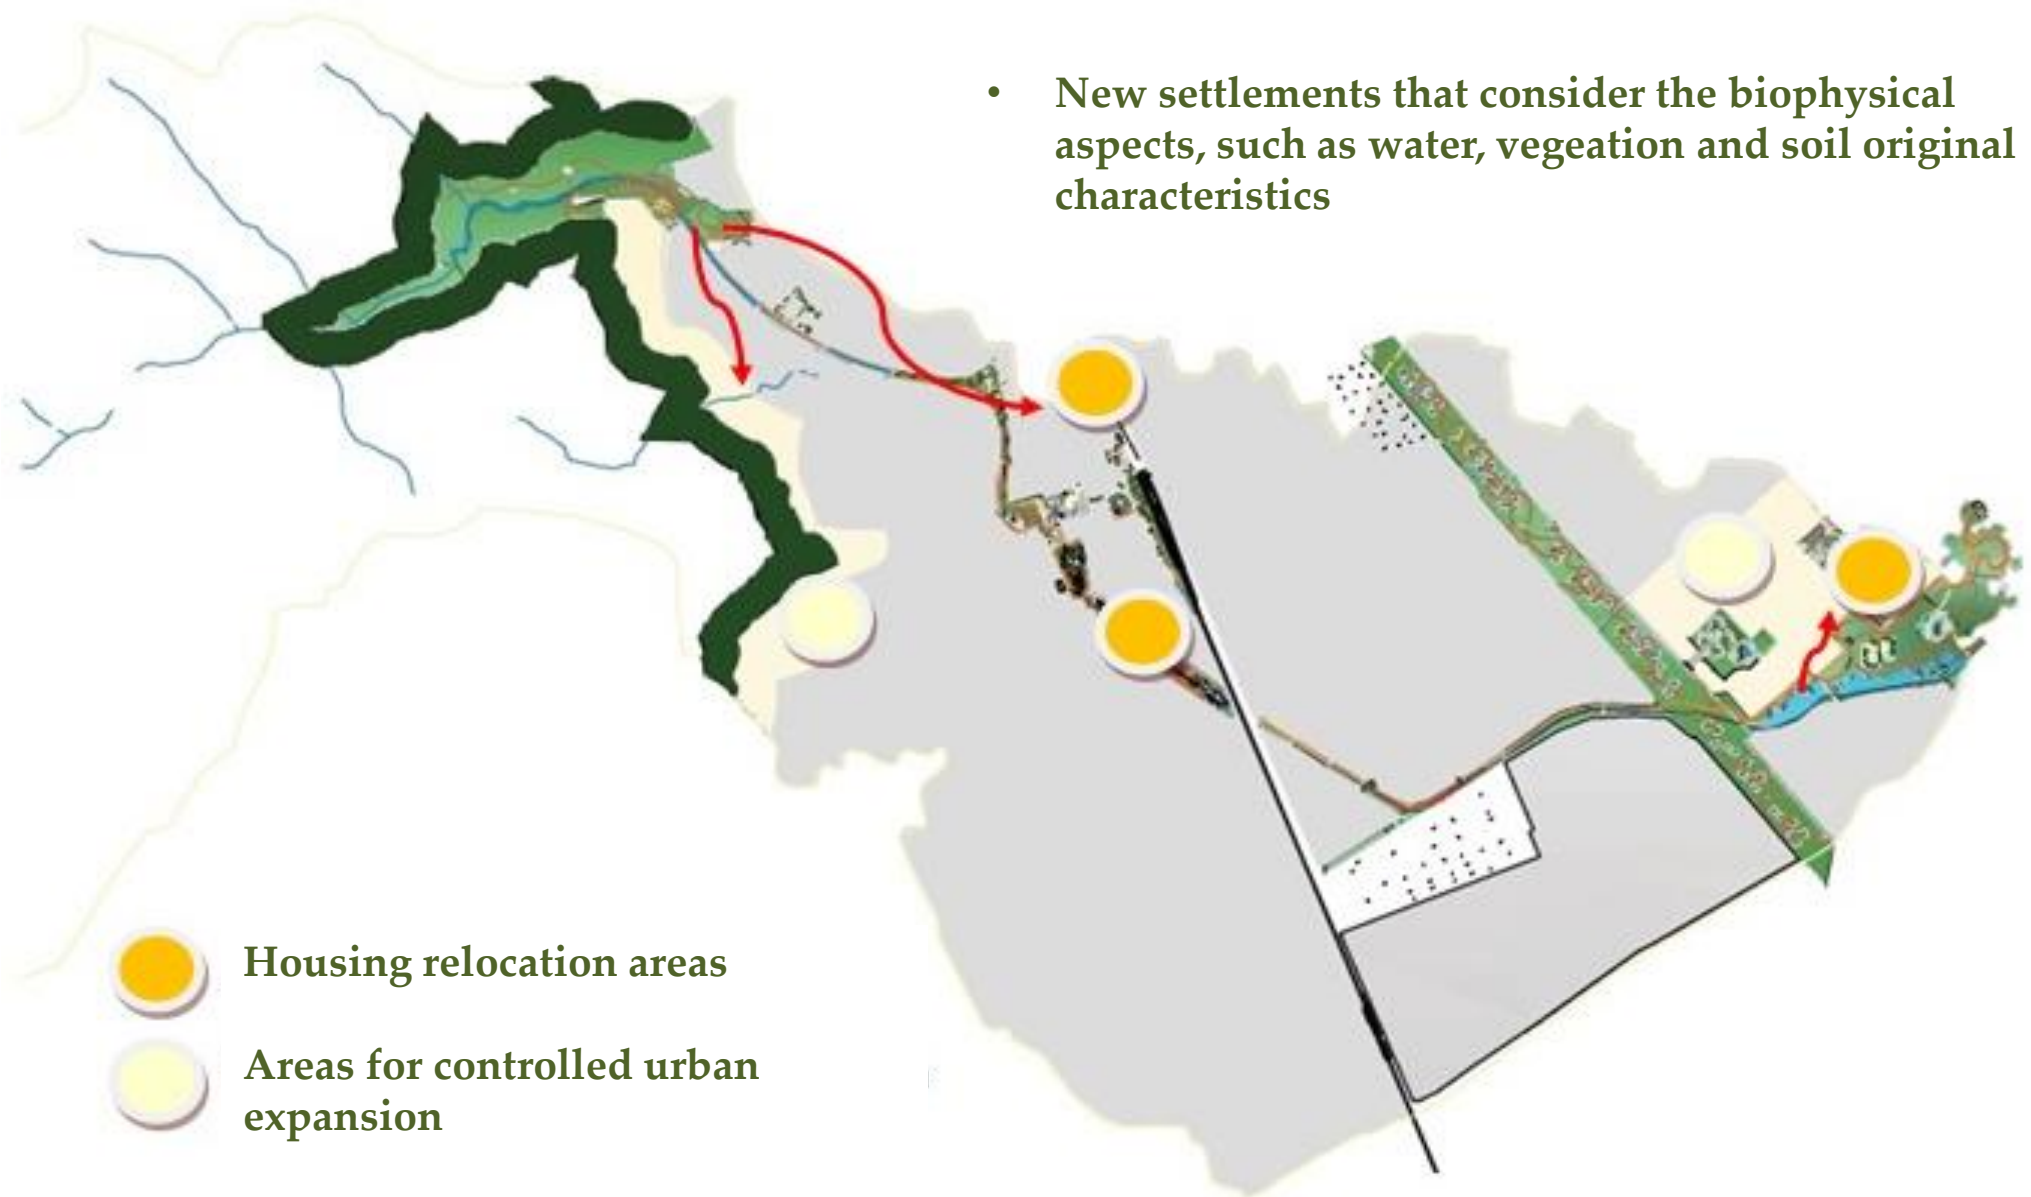



# Multifunctional Systems

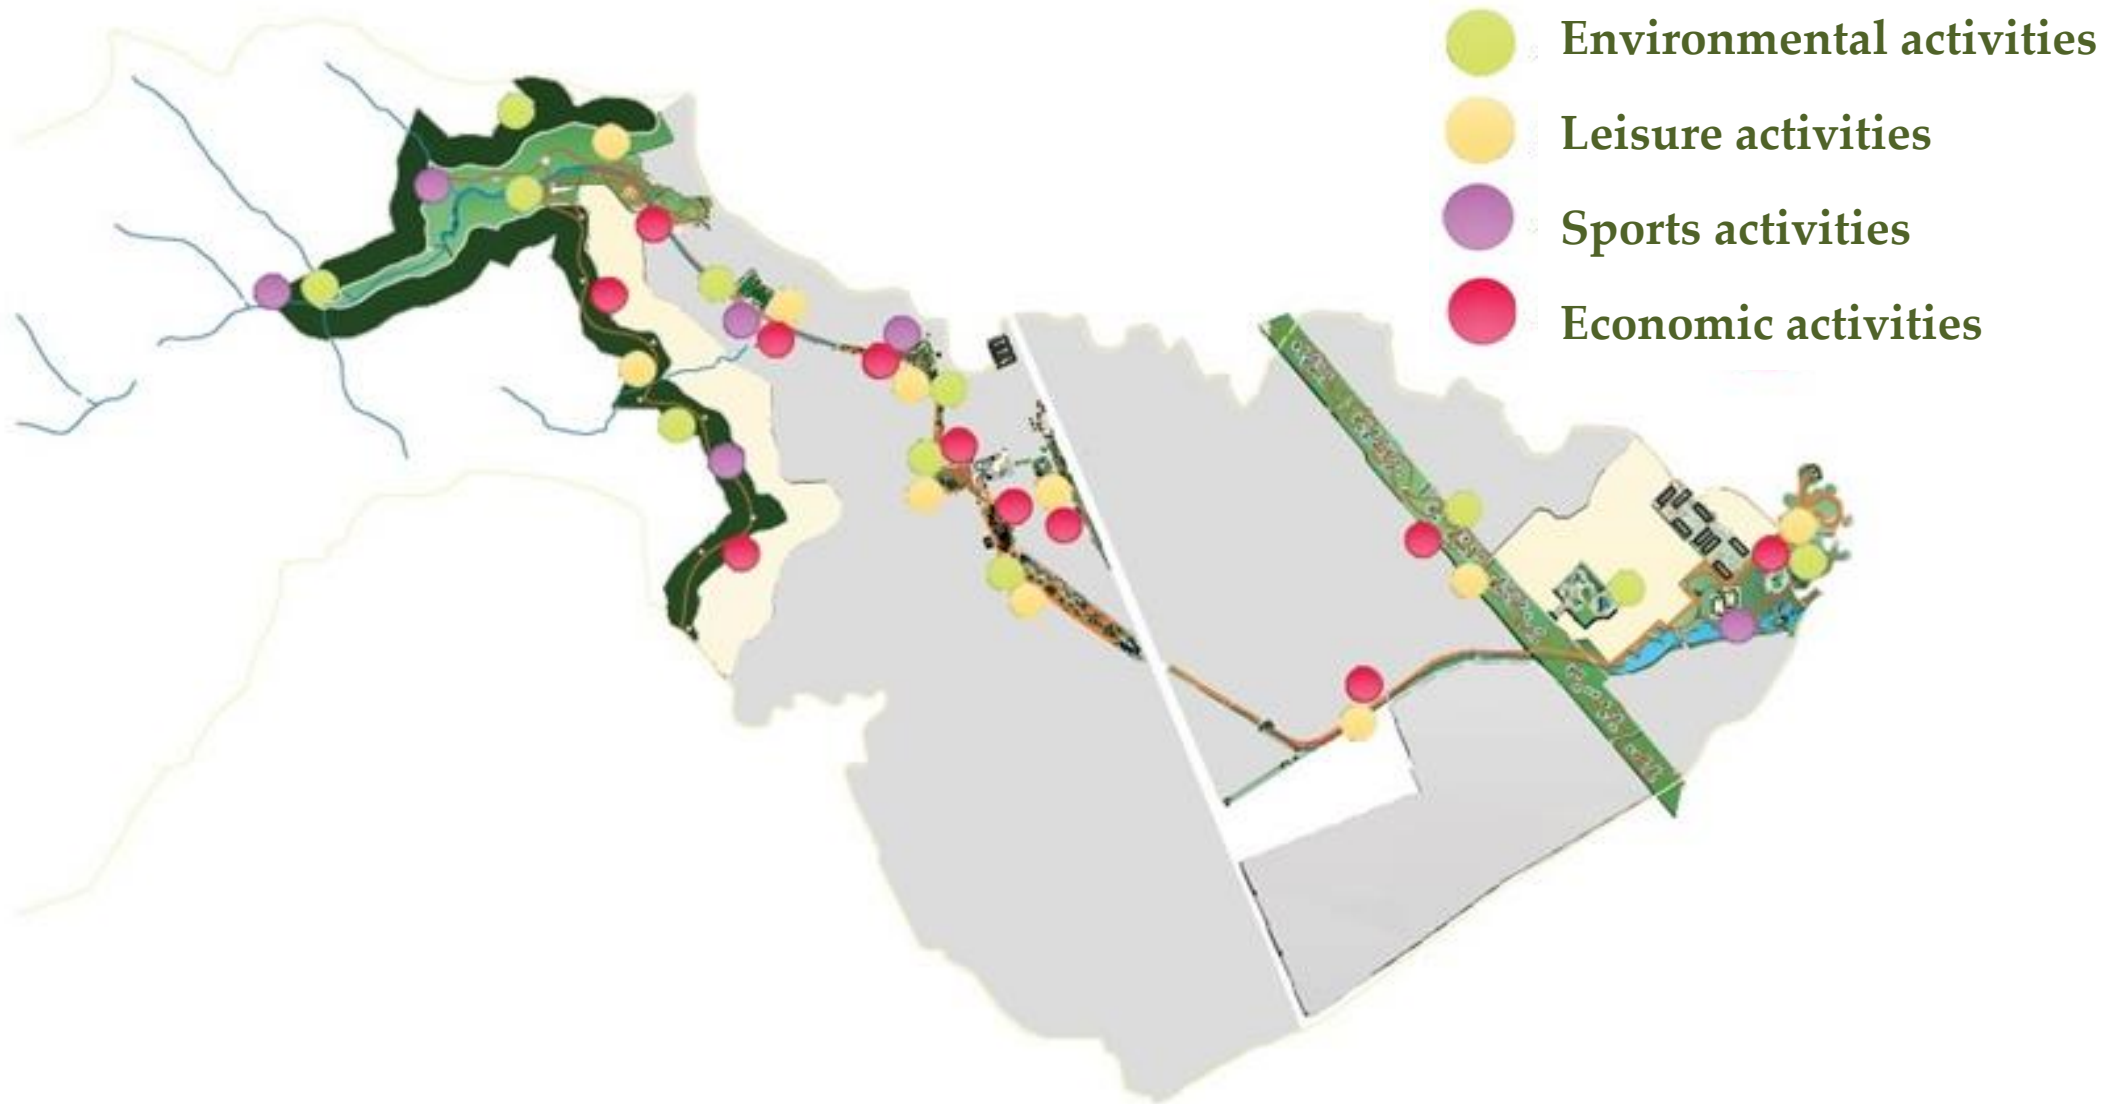

Supplement: s1 [file s1]
